# Supplementary material for: Epigenetic remodeling by vitamin C potentiates plasma cell differentiation
Source: eLife. 2022 Sep 7;11:e73754. doi: 10.7554/eLife.73754 (PMC9451539; doi:10.7554/eLife.73754)
Supplement: Supplementary file 1. — (a) Differentially expressed genes (DEGs) between naïve and day 4 mock B cells. (b) DEGs between naïve and day 4 vitamin C (VC) B cells. (c) DEGs between day 4 mock and day 4 VC B cells. (d) Components of B27 serum-free supplement. [file elife-73754-supp1.xlsx]

## Sheet: Supplementary File 1a
Supplementary File 1a. Differentially expressed genes between naïve and day 4 mock B cells.
Gene	logFC (Mock/naive)	AveExpr	P.Value	adj.P.Val
Gm16557	11.4073	5.16418	5.88901e-16	7.05611e-14
Gm29233	9.78884	4.35876	7.37695e-15	5.18805e-13
Basp1	9.03956	6.74846	2.27847e-15	2.03784e-13
Gm42538	8.86137	3.88993	2.83998e-14	1.47754e-12
9330151L19Rik	7.99316	5.04069	9.44914e-12	1.74588e-10
Gm15350	7.98658	5.21755	7.00748e-12	1.38538e-10
Gm15347	7.97998	4.22586	4.27826e-13	1.29132e-11
Tmem176b	7.94287	3.96075	5.09507e-13	1.51292e-11
BC037039	7.80981	5.68302	6.20779e-14	2.82133e-12
Apol7d	7.80129	3.8942	3.78164e-12	8.08248e-11
Gm2788	7.67525	5.7658	8.61308e-14	3.66195e-12
Htr7	7.50582	3.21287	5.5734e-12	1.13041e-10
Gm45774	7.40309	3.16603	5.09396e-11	7.2713e-10
A930001C03Rik	7.34378	3.1375	9.55916e-13	2.64314e-11
LTO1	7.31309	4.17956	6.35331e-11	8.75296e-10
Gm13070	7.22627	3.8476	1.31387e-11	2.2987e-10
Gm15512	7.16943	3.05188	4.89742e-12	1.02457e-10
Pdzd11	7.14822	5.35974	1.60382e-11	2.67573e-10
Grm6	7.14788	3.5609	3.62473e-11	5.42886e-10
Gm45667	7.02657	2.98324	1.28629e-11	2.26044e-10
Gm16567	6.97836	2.95797	7.68646e-12	1.49716e-10
Gm44985	6.97805	6.22349	3.94553e-13	1.20935e-11
Exosc9	6.94183	6.84043	1.31578e-14	8.09945e-13
Gm29100	6.92591	2.92717	2.56797e-12	5.87821e-11
Ighg2b	6.69252	3.86245	8.05237e-12	1.56016e-10
Ighg1	6.68839	4.51293	1.20919e-10	1.51782e-09
Gm37905	6.6133	4.31689	1.12868e-11	2.0378e-10
E130310I04Rik	6.58452	2.75034	1.99767e-11	3.19789e-10
Gm16556	6.54569	2.73366	5.85021e-12	1.18019e-10
Gm15851	6.44845	2.6816	2.63918e-11	4.1084e-10
Pmch	6.42309	4.38325	1.80782e-10	2.11483e-09
Gm14024	6.36513	4.63776	6.30453e-12	1.26539e-10
Ccdc85b	6.30037	3.55165	1.55042e-09	1.38383e-08
Ighe	6.25743	3.11792	2.18582e-10	2.47643e-09
Lcorl	6.18966	7.04654	4.99904e-15	3.72947e-13
Gm5340	6.18898	2.55586	1.89874e-11	3.06434e-10
Gm44570	6.10496	2.52067	1.68542e-10	1.98076e-09
Gm42456	6.10352	2.51355	8.29561e-11	1.10814e-09
Gm48488	6.05715	2.48912	3.37103e-11	5.10691e-10
Gm43621	6.02886	2.47866	1.08335e-10	1.39954e-09
Gm20556	6.0147	2.46599	4.41283e-11	6.41802e-10
Trim46	5.97803	3.22366	1.10075e-09	1.01929e-08
4930592A05Rik	5.9554	2.4371	5.19533e-11	7.37904e-10
Gm41724	5.92774	2.43378	1.48484e-10	1.80093e-09
Gm38391	5.92324	2.41493	3.08467e-10	3.33669e-09
Cish	5.89392	2.41519	1.33291e-10	1.64697e-09
Nemf	5.88098	8.93929	8.32758e-19	2.74394e-16
Gm10389	5.86572	2.39885	8.70695e-11	1.15528e-09
Ccl22	5.84699	2.37978	3.41414e-09	2.7663e-08
Wdr54	5.8281	2.38298	1.61489e-10	1.92339e-09
Gm49544	5.79725	7.08814	1.03301e-13	4.1679e-12
Cdc23	5.77818	8.15722	5.58055e-18	1.22586e-15
Rccd1	5.76179	6.64297	1.33147e-14	8.09945e-13
Gm15419	5.74576	2.34023	1.61499e-10	1.92339e-09
6530437J22Rik	5.73934	2.32778	1.93441e-10	2.23614e-09
Gm38124	5.72956	2.33469	2.706e-10	2.98869e-09
4933431E20Rik	5.71965	2.33412	1.13871e-09	1.04952e-08
Syt12	5.70363	2.30971	1.54635e-10	1.8641e-09
Gm12743	5.6751	5.28253	6.44368e-11	8.84663e-10
Lef1os1	5.66777	5.83877	4.62296e-11	6.69566e-10
Gm9136	5.65067	2.28275	2.08062e-10	2.37768e-09
Prss23os	5.63543	5.89795	1.15266e-11	2.07164e-10
Gm11149	5.62271	2.28165	5.09864e-10	5.25e-09
Ccdc24	5.59118	2.78383	3.71807e-10	3.92033e-09
Gm38037	5.58344	6.24111	3.00818e-13	9.74947e-12
Gm36099	5.57797	2.25229	2.37164e-10	2.65651e-09
Spsb2	5.56237	4.74939	1.446e-10	1.77097e-09
Gm15401	5.4985	2.21041	6.0409e-10	6.03174e-09
Gm36569	5.47589	2.73364	8.17686e-10	7.79067e-09
Gm13372	5.45411	2.20322	5.60676e-09	4.22269e-08
Tmem176a	5.41637	2.17085	7.6181e-10	7.32895e-09
Hdac11	5.40542	2.1622	5.03094e-10	5.19383e-09
2410017I17Rik	5.37952	2.68448	7.01824e-10	6.8015e-09
Gm2366	5.35317	2.14617	1.02414e-09	9.59588e-09
A230056P14Rik	5.34509	2.13584	6.31301e-10	6.25605e-09
Tmc8	5.31975	5.32852	1.9398e-10	2.23614e-09
Mtrex	5.30222	5.33824	1.75475e-11	2.90304e-10
Gpr15	5.28529	3.81792	4.8209e-09	3.7303e-08
Gm14549	5.28032	3.68214	2.52229e-09	2.09932e-08
Rp1l1	5.26977	2.62378	3.5271e-08	2.15885e-07
Ippk	5.2586	4.5503	1.52716e-10	1.8466e-09
Gatb	5.21997	2.06435	1.95751e-09	1.69365e-08
Gm45507	5.20925	9.33096	2.08286e-19	1.02946e-16
Gm9831	5.20645	2.06908	1.33704e-09	1.207e-08
Ceacam-ps1	5.14401	2.03472	1.46786e-09	1.31907e-08
Nt5c3b	5.10849	2.79476	5.20381e-09	3.96452e-08
Gm29629	5.10694	2.01467	1.74311e-09	1.53502e-08
Gm20528	5.09808	2.00751	2.15265e-09	1.82652e-08
Elovl1	5.09006	4.61235	1.6561e-10	1.96054e-09
Gm15063	5.07377	3.99039	7.28056e-10	7.0213e-09
Gm11832	5.05932	2.75964	7.03799e-09	5.24072e-08
Chid1	5.05608	3.67161	1.91988e-08	1.261e-07
Ints8	4.9915	4.69472	3.85442e-10	4.05329e-09
Gm26592	4.96413	2.4754	1.66701e-08	1.11718e-07
Sap18	4.94461	3.76659	1.59379e-09	1.41614e-08
Numb	4.93984	4.46359	2.14121e-09	1.82464e-08
Gm48840	4.93448	7.04678	5.65783e-13	1.65711e-11
Stab1	4.9152	3.50752	7.84678e-08	4.43865e-07
Chpf2	4.86722	2.42051	8.70908e-09	6.34175e-08
Lrrc41	4.82767	6.84008	5.94525e-14	2.73343e-12
Gm17041	4.78323	5.71818	2.56554e-10	2.8415e-09
Garre1	4.77782	3.95059	5.35221e-08	3.13521e-07
Gm10521	4.76247	3.14169	2.11898e-08	1.3751e-07
1110046J04Rik	4.73938	3.90299	2.73326e-09	2.25152e-08
Ubxn6	4.72202	8.25258	1.60182e-16	2.48037e-14
Dhcr24	4.71917	2.34187	1.89477e-08	1.24657e-07
Gm49227	4.70947	4.1255	2.72787e-08	1.71752e-07
Gm12744	4.6254	8.69333	4.03637e-19	1.50621e-16
Ccnyl1	4.60514	3.59503	7.68553e-09	5.68011e-08
Top2a	4.53004	2.77693	1.01814e-07	5.55272e-07
4933428G20Rik	4.52811	3.02259	2.27282e-08	1.46363e-07
Gm28535	4.49885	5.2439	1.17771e-10	1.49732e-09
4921515L22Rik	4.49271	2.23558	1.41532e-07	7.41213e-07
1700023B13Rik	4.45804	5.06554	2.56432e-10	2.8415e-09
Ung	4.44948	3.56037	3.65445e-08	2.22303e-07
Mfn1	4.42473	3.50724	1.9113e-07	9.78923e-07
Rps18-ps4	4.423	4.63225	1.5697e-08	1.06277e-07
Gm22551	4.41312	2.96387	1.57949e-07	8.19592e-07
9330171B17Rik	4.38217	2.95634	2.28546e-08	1.467e-07
Gm12660	4.36573	6.778	1.3248e-12	3.4237e-11
4932702P03Rik	4.36142	2.86613	1.18404e-06	4.89716e-06
Klhdc2	4.30752	4.78491	1.2902e-08	9.07732e-08
Lef1	4.29911	4.12205	1.32419e-08	9.26697e-08
Gm44238	4.28577	7.33291	4.12816e-14	2.01515e-12
Gm37422	4.24881	7.46142	2.73994e-15	2.35516e-13
A030001D20Rik	4.21297	3.64349	1.04598e-08	7.47885e-08
Lctl	4.20282	6.60878	1.38394e-13	5.1141e-12
Metap2	4.17194	4.7723	9.06545e-10	8.57531e-09
Gm26588	4.17097	3.37656	4.50276e-07	2.09705e-06
Lrrc59	4.15575	5.47664	1.05232e-10	1.37323e-09
G430095P16Rik	4.15329	2.59873	2.07418e-07	1.04895e-06
Mcm6	4.08355	2.56304	8.00061e-08	4.5192e-07
A230020J21Rik	4.05751	8.71624	5.54493e-18	1.22586e-15
Gm15518	4.04858	5.63568	1.85063e-10	2.15217e-09
Fancd2os	4.0371	4.18762	1.5003e-08	1.02279e-07
Wdr5b	3.99065	7.57188	9.56589e-14	3.89933e-12
Pomgnt1	3.94461	7.33429	1.82115e-14	1.02869e-12
Ldha	3.9127	2.99481	7.49848e-07	3.25646e-06
Gm29054	3.91	6.31139	5.15312e-12	1.06678e-10
Fam227b	3.90626	5.81689	5.07526e-11	7.27086e-10
Gm26738	3.89795	6.63979	3.29476e-13	1.0422e-11
Mterf4	3.89727	3.40806	1.62609e-07	8.42669e-07
Gm47863	3.8761	4.24449	9.08044e-08	5.02155e-07
Gm40645	3.8742	3.62485	9.83186e-07	4.1489e-06
4930597O21Rik	3.86633	6.15626	3.74374e-12	8.04497e-11
Gm49179	3.86511	3.40008	3.49237e-06	1.27741e-05
Rnf113a1	3.86216	2.70018	3.60768e-07	1.73326e-06
Maff	3.84149	4.71971	9.02265e-09	6.54598e-08
Gtpbp6	3.82107	6.4283	5.40266e-10	5.51993e-09
BC001981	3.80005	4.22768	5.12093e-08	3.01761e-07
Gm13571	3.79949	8.56901	1.52113e-17	2.86407e-15
Gm47513	3.76444	5.87828	2.99131e-10	3.25831e-09
Rrm2	3.75085	2.89016	6.87571e-07	3.02746e-06
Gm11946	3.73096	5.77299	9.73867e-10	9.14649e-09
Gm45819	3.72301	3.39751	1.14316e-05	3.64813e-05
Gm15743	3.7108	7.24136	1.5838e-13	5.79848e-12
Phox2a	3.69535	3.38848	3.67569e-07	1.75952e-06
Rmdn3	3.69418	4.17064	7.57741e-08	4.31095e-07
Gm37759	3.68241	7.22216	1.57662e-14	9.08612e-13
Clhc1	3.67775	2.88291	1.84622e-06	7.34401e-06
Mlx	3.66698	3.73971	1.24213e-05	3.92911e-05
Gm26577	3.66306	7.93681	3.49592e-15	2.86577e-13
B230206H07Rik	3.65943	3.661	7.04072e-07	3.08294e-06
4930483K19Rik	3.65215	7.97565	1.37838e-15	1.39746e-13
mt-Ty	3.6468	5.7672	8.48642e-09	6.20246e-08
mt-Te	3.63322	7.58867	3.39061e-13	1.06401e-11
Tacc3	3.62285	2.81717	1.12832e-06	4.69618e-06
BC049715	3.6097	3.50275	5.01447e-07	2.28952e-06
Gm26811	3.60507	5.86638	2.0075e-09	1.73311e-08
Trappc4	3.59598	3.47762	2.64295e-06	1.00002e-05
Gm5106	3.5909	4.65125	1.40867e-08	9.71793e-08
Pkm	3.58356	5.25824	1.37616e-08	9.55828e-08
Gm6277	3.57614	3.61823	6.34433e-07	2.80285e-06
Gm10461	3.52989	3.30078	2.80707e-07	1.38049e-06
Krr1	3.52811	9.6083	4.19026e-19	1.50621e-16
Gm2065	3.52803	6.50639	2.74005e-12	6.15576e-11
Gm31749	3.51376	3.04811	1.00302e-06	4.21459e-06
Jam3	3.50103	3.28831	3.44336e-07	1.6624e-06
Tlcd3b	3.49741	11.6967	5.77311e-20	4.94028e-17
Gmnn	3.47184	2.74826	9.92427e-06	3.21381e-05
Rhof	3.44771	5.45566	5.85506e-10	5.90584e-09
Gm29331	3.43929	3.65926	2.23109e-07	1.11951e-06
Rapgef3os1	3.40122	3.53225	4.73903e-07	2.19159e-06
1700020L13Rik	3.38646	5.08831	7.41836e-09	5.50322e-08
Smcr8	3.38644	4.66409	3.07952e-08	1.90554e-07
Gm17040	3.37288	4.75234	6.0046e-07	2.66168e-06
Gm15792	3.35981	6.60509	8.89564e-12	1.69103e-10
Mfsd3	3.35545	5.55293	6.51272e-10	6.39768e-09
Gm14817	3.35489	3.24653	1.96101e-06	7.73065e-06
Keap1	3.35083	4.85583	6.63789e-06	2.27044e-05
Gm37787	3.31925	9.50844	3.48799e-19	1.50621e-16
Fam222a	3.31181	3.64876	4.38447e-07	2.04678e-06
Wee1	3.29495	3.09461	6.79626e-06	2.31859e-05
Cd84	3.28659	4.68149	1.07898e-07	5.82825e-07
Aldoa	3.28622	4.51922	5.02802e-07	2.29305e-06
Gm14091	3.26416	7.54659	2.74979e-14	1.46721e-12
5031425E22Rik	3.23786	6.09285	3.34825e-11	5.09192e-10
A330035P11Rik	3.2209	2.89875	1.49447e-05	4.63825e-05
Pced1b	3.18595	5.38497	2.03667e-09	1.75065e-08
Gm2453	3.15131	5.75627	6.0175e-10	6.03174e-09
Gm15247	3.12675	3.89185	3.87911e-05	0.000109479
Gm2895	3.1241	5.78644	1.91453e-09	1.6601e-08
2600006K01Rik	3.12007	3.34202	2.21684e-06	8.58512e-06
Eif4a2	3.09402	6.90451	3.61337e-12	7.85014e-11
Hmgb2	3.08459	4.12547	5.32577e-06	1.86026e-05
Gpr62	3.06906	3.24269	5.84171e-06	2.01907e-05
Rapgef3os2	3.05395	3.22213	7.02101e-06	2.38293e-05
Polg	3.04807	6.96751	1.35743e-12	3.48524e-11
Gm36189	3.03238	3.56944	1.04044e-05	3.35282e-05
Gga3	3.03037	6.35321	1.10049e-09	1.01929e-08
Gm17509	3.00932	6.33617	3.03007e-10	3.29145e-09
Slc43a1	2.99748	5.74577	1.22015e-09	1.10908e-08
Gm12043	2.99481	4.6823	6.97049e-08	4.01184e-07
Slc16a11	2.95106	4.36625	1.02554e-06	4.3001e-06
Cdc123	2.94368	3.27659	1.95369e-05	5.90587e-05
Scd2	2.9427	3.5842	5.77065e-06	1.99625e-05
Gm17035	2.94126	8.08477	2.87639e-12	6.38947e-11
Pim1	2.93816	4.02405	9.5388e-07	4.05117e-06
Gm10475	2.93589	4.0153	2.97093e-06	1.10717e-05
Gm48342	2.93305	10.4208	5.93891e-20	4.94028e-17
Nusap1	2.91871	6.17395	1.86184e-09	1.6287e-08
Gm44198	2.90374	4.4173	2.12065e-06	8.27746e-06
Gng13	2.89949	6.40633	2.88071e-11	4.43203e-10
Frs3os	2.89291	3.85844	2.30651e-06	8.87154e-06
Bmyc	2.89274	5.17205	4.50703e-08	2.69603e-07
Ubap1	2.87149	5.86872	1.46308e-08	1.00103e-07
Gm26885	2.86468	10.8055	6.10369e-20	4.94028e-17
Mgat2	2.86448	4.98038	1.42647e-07	7.46064e-07
A930004D18Rik	2.86445	3.12779	2.05525e-05	6.16109e-05
D10Wsu102e	2.86334	4.50219	5.27776e-07	2.38222e-06
Gm48574	2.86011	5.6904	4.41462e-09	3.46338e-08
Gm10143	2.8601	11.2383	6.25433e-20	4.94028e-17
Gm47112	2.85616	6.24447	5.35619e-10	5.48662e-09
Vps29	2.85069	6.78994	1.0341e-11	1.87771e-10
Cops6	2.84328	7.48324	6.49508e-14	2.91836e-12
Dclre1c	2.82915	5.83149	3.43221e-09	2.77525e-08
Rufy1	2.82471	5.67232	1.79549e-09	1.57763e-08
mt-Ta	2.82256	8.42417	6.45375e-15	4.63966e-13
B4galt1	2.80113	4.36132	1.77875e-06	7.09704e-06
Gm45453	2.78336	4.89557	1.14882e-07	6.14674e-07
Gm11788	2.76989	7.04818	9.24836e-12	1.72491e-10
C130083M11Rik	2.75241	6.2091	1.05865e-10	1.37695e-09
Gm42838	2.74478	4.89854	3.70321e-07	1.76629e-06
Bysl	2.70174	9.66486	4.03508e-18	9.9717e-16
mt-Tc	2.69818	6.54579	1.51664e-09	1.35674e-08
Kctd10	2.67896	4.3297	2.88601e-06	1.08061e-05
Gm45760	2.66941	10.1787	3.3895e-18	8.93472e-16
Gm46218	2.66537	6.43196	4.2016e-10	4.37188e-09
Sub1	2.66447	3.72443	4.95734e-05	0.000135932
Gm12999	2.65698	9.87952	2.0618e-18	5.82312e-16
Gm10602	2.65039	7.3102	2.5206e-12	5.86263e-11
BC037032	2.64759	8.2955	3.90736e-15	3.08994e-13
Hirip3	2.64266	4.52597	5.08676e-07	2.30735e-06
1810014B01Rik	2.63148	12.8179	1.16843e-19	6.59998e-17
Malsu1	2.6152	7.29288	1.22932e-11	2.17969e-10
Hif1a	2.59098	4.56893	6.25332e-05	0.000168431
G530011O06Rik	2.58527	4.50813	1.72116e-06	6.89509e-06
A430088P11Rik	2.58316	4.42303	2.39562e-06	9.16969e-06
Gapdh	2.57895	3.589	3.73362e-05	0.00010613
Ezh2	2.57828	3.56214	0.000123421	0.000309257
Gm16712	2.57794	9.43311	3.07159e-16	4.18795e-14
St3gal6	2.57599	4.22586	3.33449e-06	1.22761e-05
Rhno1	2.57085	3.55011	2.91518e-05	8.463e-05
mt-Tp	2.55362	9.47384	7.83552e-17	1.2909e-14
Acat3	2.55143	11.1815	7.49663e-20	4.94028e-17
Gm10874	2.53618	5.81637	3.81357e-09	3.0586e-08
Tnk1	2.52548	3.96802	2.70967e-05	7.88956e-05
Tspan31	2.52327	5.76171	5.69205e-09	4.27878e-08
Trip4	2.52219	4.93901	4.46098e-07	2.08004e-06
Gm28626	2.51881	5.51362	1.18681e-08	8.42487e-08
Glt8d1	2.51814	3.61699	6.72049e-05	0.000179565
Mir1905	2.5037	4.3832	2.51323e-06	9.53677e-06
Rnf146	2.50173	9.10818	6.70577e-16	7.79842e-14
Hdgf	2.501	4.60127	1.08335e-06	4.52668e-06
Slc25a35	2.50095	6.979	3.4338e-11	5.18216e-10
Lmnb1	2.4948	3.704	1.07814e-05	3.46302e-05
Gm41396	2.49196	8.39681	1.10182e-13	4.40058e-12
Trim24	2.49087	4.82597	5.32273e-07	2.39978e-06
Gm13199	2.48666	8.41272	2.25502e-12	5.4368e-11
Dnah11	2.48439	7.03873	8.32354e-12	1.59763e-10
Mxd3	2.4807	9.21301	2.14575e-15	2.02007e-13
Cfap410	2.47357	5.77972	9.93411e-07	4.17867e-06
4930524O07Rik	2.46187	10.3641	1.51444e-17	2.86407e-15
Gm8774	2.46171	4.48658	6.41026e-06	2.20019e-05
Gm44085	2.46062	5.84485	9.86032e-08	5.39941e-07
2310033P09Rik	2.45868	3.7286	1.36211e-05	4.26427e-05
Gm50092	2.43875	4.91608	3.48508e-06	1.27593e-05
Gm50336	2.42982	5.68776	3.1872e-08	1.96602e-07
Ezh1	2.42888	3.3071	7.33086e-05	0.000193607
mt-Tn	2.42515	7.01759	5.24234e-10	5.38395e-09
Gm9905	2.42336	8.3367	8.62041e-15	5.77714e-13
Ybx3	2.42148	4.94545	4.88387e-07	2.24544e-06
Snrpf	2.4054	3.70615	5.98958e-05	0.000161989
0610038B21Rik	2.40149	4.54214	8.65976e-06	2.84155e-05
Wdr61	2.38539	4.07098	1.45244e-05	4.51491e-05
Dxo	2.38049	4.79837	1.44589e-06	5.85764e-06
Clec4g	2.3792	4.81765	5.26851e-06	1.84188e-05
mt-Nd2	2.3785	7.91238	8.92775e-13	2.50357e-11
1700101I11Rik	2.3672	4.86188	3.03758e-06	1.12881e-05
Mki67	2.35452	4.53302	1.4188e-05	4.42422e-05
Mroh8	2.35083	8.74774	7.47898e-15	5.18805e-13
Ccdc116	2.35011	5.51442	1.20877e-07	6.43269e-07
Gm47210	2.34969	6.54164	2.23965e-10	2.52295e-09
Gm44732	2.34449	4.90645	6.02182e-07	2.66632e-06
Pank2	2.33775	3.39342	9.21965e-05	0.00023718
Smco3	2.31935	3.47079	0.000105919	0.000269674
Cdh23	2.31385	4.73766	1.23984e-06	5.10129e-06
Gm31834	2.30486	9.33528	8.31744e-16	9.39633e-14
Fndc9	2.30153	8.18575	2.03376e-13	6.97015e-12
Pip4p1	2.29495	10.771	1.81201e-16	2.65359e-14
Csnk1d	2.28377	4.66811	1.57983e-06	6.36762e-06
A230087F16Rik	2.27765	6.63326	8.21025e-10	7.80369e-09
Gm11110	2.26997	5.7809	3.02222e-08	1.87596e-07
Gm15760	2.22865	5.20019	1.65855e-06	6.65777e-06
Klc1	2.22429	4.0022	5.75384e-05	0.000155827
Gm42529	2.21584	4.10195	2.62091e-05	7.64988e-05
Vps35	2.21098	4.60056	8.27393e-06	2.73767e-05
Gm50068	2.20823	5.8021	1.35928e-08	9.49575e-08
4731419I09Rik	2.20154	6.27161	6.86033e-09	5.11807e-08
Pdha1	2.1974	5.35461	3.7231e-07	1.7715e-06
Gm14302	2.19372	5.25295	2.34139e-06	8.9795e-06
Sdf2	2.19125	5.48141	9.06889e-08	5.02155e-07
4933408J17Rik	2.18642	8.70877	6.9028e-12	1.37154e-10
Riox2	2.18194	5.9498	3.28541e-08	2.02344e-07
Eif1ax	2.17661	4.40499	0.000133964	0.000332304
Gm44775	2.17633	5.80862	3.43604e-08	2.10637e-07
Gm17147	2.16775	3.65682	0.000246259	0.000575138
Tbc1d17	2.15852	13.5006	1.7928e-18	5.45287e-16
Cct2	2.15849	3.44612	0.00130254	0.00260376
Akap9	2.15067	6.87931	1.14815e-09	1.05331e-08
1600012H06Rik	2.14999	7.85786	1.27056e-12	3.34919e-11
Thyn1	2.14704	4.48537	2.9875e-05	8.66025e-05
Txnrd2	2.14625	5.06408	1.35057e-05	4.23487e-05
Primpol	2.14544	6.60192	4.26103e-10	4.42208e-09
A930035D04Rik	2.13989	4.98402	1.22311e-06	5.04818e-06
Gm50394	2.13965	7.99702	8.23742e-13	2.34322e-11
C030005K06Rik	2.13696	6.40911	2.61134e-09	2.16009e-08
1700060J05Rik	2.13488	5.70275	1.09253e-07	5.88535e-07
P2rx3	2.12768	8.74188	1.80175e-13	6.36081e-12
1700030C12Rik	2.12036	7.73913	2.54582e-12	5.87821e-11
Rnaseh2a	2.11845	8.6893	2.78302e-14	1.46721e-12
Gm12905	2.1177	7.1102	1.96878e-10	2.25639e-09
Scyl3	2.09515	6.78615	7.52056e-09	5.56859e-08
Nek6	2.09075	10.7934	1.18137e-17	2.4585e-15
Atf5	2.08693	8.71409	1.35678e-13	5.06106e-12
Arl5c	2.08018	4.77664	4.9422e-05	0.00013561
Ccn6	2.07535	4.19302	0.000189816	0.000454592
Eme1	2.07362	8.36911	7.27953e-12	1.42491e-10
Gse1	2.06627	7.25301	5.20676e-11	7.37904e-10
Mroh2a	2.05891	8.22319	3.0925e-12	6.79319e-11
Gm26642	2.05746	9.08127	1.58559e-14	9.08612e-13
Dhx57	2.05642	4.19981	7.18707e-05	0.000190212
Dhx58os	2.05605	8.19862	7.6242e-11	1.0324e-09
Cdk4	2.05314	9.17578	1.37958e-14	8.26491e-13
Tmem132a	2.05122	8.60732	5.00403e-14	2.38385e-12
Ndufaf3	2.04872	5.62917	2.07455e-07	1.04895e-06
Wsb2	2.04739	4.94809	4.73638e-06	1.6766e-05
Gm49150	2.04711	6.82819	4.15944e-08	2.50326e-07
Ybx1	2.04649	5.86903	5.92903e-08	3.45773e-07
Gm11100	2.04053	9.47511	2.31924e-15	2.03784e-13
Alg3	2.04051	5.50768	5.75916e-07	2.5615e-06
Spcs1	2.03927	4.6992	7.92383e-06	2.64172e-05
Gm20535	2.03923	4.41929	6.08962e-05	0.000164358
Becn1	2.0377	3.91098	0.00029871	0.000684298
Gm16984	2.0375	8.00053	2.21598e-12	5.37545e-11
Ccdc38	2.02642	9.16581	4.12263e-14	2.01515e-12
Gm14233	2.02416	3.78598	0.000213044	0.000504718
Gm26631	2.02263	10.5667	5.35171e-17	9.20029e-15
Syngr2	2.02112	3.7987	0.000482834	0.00105302
Gm26737	2.0202	7.83296	3.21797e-12	7.02975e-11
Ighmbp2	2.01266	3.68341	0.00291009	0.00539958
Tex9	1.99165	5.91611	6.51957e-08	3.76327e-07
Gm10197	1.98627	7.5305	7.81454e-11	1.05456e-09
Gm11491	1.98333	7.85585	2.51095e-12	5.86263e-11
Phykpl	1.98055	12.7787	2.64117e-16	3.72971e-14
Alyref	1.95597	3.94218	0.000255632	0.000593523
Tpi1	1.94071	3.98967	0.000320145	0.000729598
Fkbp8	1.93939	4.73086	6.64564e-05	0.000177787
Klhl42	1.93577	3.85393	0.000208021	0.000493707
Ddb1	1.93351	4.15469	0.000411763	0.000910576
Gm44036	1.92542	5.26658	2.06175e-05	6.17588e-05
Gm13066	1.92348	4.63651	1.62824e-05	5.01408e-05
Xrcc6	1.92269	8.70172	2.36514e-13	7.85863e-12
Aebp2	1.92196	5.6451	1.3075e-06	5.36291e-06
Gm42413	1.92011	10.2796	8.6486e-16	9.49905e-14
Vav2	1.91712	4.71318	1.79226e-05	5.46385e-05
Gm45669	1.91478	6.24419	1.41075e-08	9.71793e-08
Mir1957b	1.90372	5.02713	8.35867e-06	2.76108e-05
Kcnab2	1.90297	3.74794	0.000652733	0.00138164
Gm12868	1.90295	8.96302	1.42003e-12	3.62244e-11
Lonp1	1.89324	3.72491	0.000361658	0.000811114
Gm15829	1.89235	7.87043	3.84263e-11	5.66932e-10
Shc4	1.88702	10.4454	4.05301e-15	3.14227e-13
Gm28914	1.88358	5.16194	5.7048e-06	1.97866e-05
Gm44729	1.8828	9.84082	8.98813e-15	5.92318e-13
AY074887	1.8826	8.07117	1.82518e-11	2.9945e-10
Gm14820	1.88046	9.3164	9.37897e-14	3.89933e-12
Gm15890	1.87954	3.74246	0.00026637	0.000616284
Ercc1	1.87922	6.62669	1.47963e-08	1.01044e-07
Usp34	1.87896	9.16416	1.6305e-13	5.86089e-12
Naa15	1.87691	4.0284	0.000158707	0.000386884
Sem1	1.8734	4.3838	0.000386695	0.000861405
Gm43361	1.87131	8.96394	1.20971e-13	4.73582e-12
Eif2ak1	1.8694	8.6744	1.04248e-12	2.82326e-11
Ppp1r14b	1.86921	4.51796	4.60367e-05	0.000127471
Ccnc	1.85843	7.86596	1.57977e-11	2.64678e-10
Gm48145	1.85724	4.05522	0.000116432	0.000293231
Gm47327	1.8523	7.14677	1.68821e-10	1.98076e-09
9530080O11Rik	1.84148	6.38134	1.22892e-08	8.67708e-08
Gm10653	1.8336	5.85623	5.18134e-07	2.34138e-06
Gm20163	1.83355	3.89887	0.000254018	0.000591164
Psph	1.83216	8.70768	9.42966e-12	1.74588e-10
Tbc1d8	1.8211	7.40338	3.30975e-10	3.53696e-09
Gm5831	1.81492	5.90662	5.08239e-07	2.30735e-06
Trmt13	1.81457	7.27418	8.05906e-10	7.69698e-09
Lrp2bp	1.81423	8.58327	6.40657e-10	6.33289e-09
1700018A23Rik	1.81063	8.92661	1.27215e-13	4.83663e-12
Otulinl	1.80764	5.85801	6.58127e-07	2.90428e-06
AI413582	1.80724	5.25301	2.28893e-06	8.8125e-06
Kif4	1.80406	6.68151	5.39788e-09	4.08874e-08
Prss57	1.80186	5.92602	1.2543e-06	5.1554e-06
Gm49727	1.8006	8.53162	4.66008e-12	9.90642e-11
Loxl3	1.79951	9.53112	6.0868e-13	1.744e-11
Gm17206	1.79934	6.82095	4.0137e-08	2.42663e-07
Gm10550	1.78994	8.48481	2.58761e-12	5.88011e-11
A730017L22Rik	1.78649	3.92456	0.000490979	0.00106784
Gm17080	1.77737	7.92745	1.3422e-11	2.33792e-10
Gm20512	1.77645	9.5478	2.13738e-12	5.31521e-11
Fam166a	1.77328	8.84023	2.4505e-12	5.78821e-11
Rbm18	1.77137	4.79584	2.41908e-05	7.14876e-05
Mcmdc2	1.76928	6.30599	2.83578e-08	1.77135e-07
Gm37676	1.76611	8.53869	4.73489e-12	1.00116e-10
Lrrc57	1.76558	5.29117	7.20596e-06	2.43494e-05
Smim27	1.76441	8.77115	1.03079e-12	2.81085e-11
Ufsp2	1.76091	5.41017	2.02037e-05	6.07686e-05
6430562O15Rik	1.76053	8.69592	5.12724e-13	1.51292e-11
Gm14573	1.7563	6.11988	3.14936e-07	1.53357e-06
Fgf22	1.75518	6.37804	2.97658e-08	1.85345e-07
Ppm1g	1.74731	3.55051	0.00092147	0.00189963
Ivns1abp	1.74553	5.72814	6.51586e-06	2.23449e-05
Ddit3	1.74469	6.90998	2.6633e-08	1.67954e-07
Gm28989	1.7432	7.34822	1.86712e-09	1.62971e-08
Gm10459	1.74141	9.00978	8.84724e-13	2.49871e-11
Tada1	1.73977	3.89564	0.00372996	0.00679957
4930558J22Rik	1.73321	4.71983	0.000157198	0.000384153
Gm26672	1.72808	4.54415	6.86716e-05	0.000182724
Gm43031	1.72729	4.88657	3.95105e-05	0.000111113
Ddx28	1.72637	5.15581	1.61402e-05	4.97415e-05
Rundc3a	1.72509	4.62982	5.78018e-05	0.000156433
Gm11201	1.72459	6.74859	1.39717e-08	9.65809e-08
Gtf2a1	1.72172	3.77225	0.00141655	0.00281035
2610020C07Rik	1.72115	9.85474	1.62522e-13	5.86089e-12
Sqstm1	1.72035	7.19754	4.69053e-09	3.6569e-08
Rrp7a	1.71923	8.22806	9.59945e-12	1.76541e-10
2010009K17Rik	1.71664	3.76043	0.00096936	0.00198902
Exoc3l	1.71511	4.38105	0.000537093	0.00115417
Gm28913	1.71277	5.12527	2.43134e-05	7.17427e-05
2310001H17Rik	1.71004	6.12544	2.35153e-05	6.95953e-05
Orc2	1.70567	4.08419	0.000371822	0.000831083
Gm16062	1.70159	9.18353	2.15548e-12	5.32674e-11
Cfap157	1.7002	5.03883	3.27572e-05	9.42662e-05
Gm10138	1.69681	10.1628	5.25896e-15	3.85073e-13
Gm9823	1.69525	11.0813	2.24937e-15	2.03784e-13
Mars1	1.68843	5.84345	2.90426e-06	1.08642e-05
Mical3	1.68788	4.95034	3.22616e-05	9.29077e-05
Lrrc24	1.68502	4.98887	1.93177e-05	5.84856e-05
Nudcd1	1.67475	8.90017	1.81006e-11	2.98208e-10
Gm47958	1.67418	6.29968	8.03071e-08	4.52973e-07
Thoc6	1.67315	6.13432	2.40688e-07	1.20466e-06
Gm10676	1.67169	4.81263	9.36459e-05	0.000240595
Usp16	1.66985	5.54451	3.07772e-06	1.14266e-05
Gm48746	1.66823	5.2968	3.66948e-05	0.000104457
Ruvbl2	1.66183	7.16795	2.78586e-09	2.29008e-08
Mrpl13	1.65574	6.79245	4.99922e-09	3.8457e-08
Mrpl10	1.64948	4.5487	0.000151087	0.000370594
Gm20604	1.64688	8.29894	1.72471e-11	2.86533e-10
Hnrnpd	1.64122	6.13983	1.93216e-07	9.87049e-07
Gm28800	1.63644	6.14306	1.00536e-06	4.21996e-06
Gm44002	1.63276	7.5949	5.43575e-10	5.53942e-09
Thra	1.632	3.8772	0.00100508	0.00205485
Mrpl27	1.63155	4.03932	0.000507389	0.00109809
Rpl10a	1.63061	3.7178	0.000976613	0.00199976
D430001F17Rik	1.62802	9.66158	5.39442e-14	2.53923e-12
Pdzd9	1.62763	9.89559	2.03329e-14	1.13234e-12
Ercc2	1.61566	4.42535	0.000279647	0.000644362
Gm13008	1.60425	8.64701	1.00566e-11	1.84091e-10
mt-Cytb	1.60412	8.79017	2.9579e-10	3.23081e-09
Ube2m	1.60325	4.82569	6.02202e-05	0.000162644
C77080	1.59337	5.23483	1.3684e-05	4.27448e-05
Jmjd6	1.5915	4.40402	0.000665026	0.00140465
Gstz1	1.58942	7.66407	7.67188e-08	4.35842e-07
Hsp90b1	1.58351	7.41609	4.17966e-08	2.5116e-07
Gm15726	1.58351	5.55722	5.43769e-06	1.89433e-05
Gm17590	1.58208	5.9756	8.13848e-06	2.69736e-05
Ccdc117	1.58053	5.07065	8.96839e-05	0.000231469
Atp8b2	1.57952	3.85271	0.00138822	0.00275692
Cyb5r3	1.57633	4.87817	0.00032752	0.000744262
Gm37256	1.57228	5.10759	2.01083e-05	6.06007e-05
mt-Rnr2	1.56958	5.67044	0.000413456	0.00091381
Gm17108	1.56856	10.1612	3.4669e-13	1.07938e-11
Ywhae	1.56733	4.85609	0.000311451	0.000710605
Hars2	1.56159	8.10143	2.92816e-09	2.39213e-08
Gm10734	1.56022	8.43385	5.44279e-11	7.686e-10
mt-Tq	1.55661	6.94677	3.07162e-07	1.49756e-06
Mrpl47	1.55502	9.84567	1.84363e-13	6.45107e-12
Gm33051	1.55379	10.7665	1.18814e-14	7.57727e-13
Gm50149	1.54785	5.62001	6.99041e-06	2.37866e-05
Mlst8	1.54672	4.80966	8.64075e-05	0.000224036
Gm1976	1.54662	5.92697	1.22103e-06	5.0449e-06
Gm44986	1.54533	7.99587	6.89921e-11	9.37438e-10
Gm17661	1.54446	6.88805	1.13717e-07	6.10918e-07
Pde12	1.54294	4.67372	0.000358077	0.000803539
Tgm4	1.54205	7.2451	1.69272e-08	1.12677e-07
Gm15945	1.53556	5.64637	1.12823e-05	3.60342e-05
Marcks	1.53498	7.12457	3.20925e-07	1.55698e-06
4930455C13Rik	1.5335	8.75349	1.37565e-11	2.37526e-10
Dis3l	1.53313	5.09696	4.72349e-05	0.000130151
Ankrd49	1.5318	6.05022	1.40895e-06	5.73147e-06
Gspt1	1.52821	4.62228	0.000483418	0.00105371
Dusp2	1.52781	5.21851	0.000181969	0.000436859
mt-Nd5	1.52363	9.47701	1.03526e-11	1.87771e-10
Pcbp2	1.52335	4.93795	5.68406e-05	0.000154254
Gm44771	1.51289	7.69758	3.26773e-09	2.65856e-08
Tk1	1.5115	7.29775	2.12142e-08	1.3751e-07
Suz12	1.51056	3.80434	0.00204267	0.00391884
Gm9754	1.50871	9.22507	1.0528e-12	2.83181e-11
Dock3	1.50385	4.26972	0.00137248	0.00272841
Tcf3	1.50328	4.88996	0.000286539	0.000659473
Larp1	1.50276	4.37111	0.000423176	0.000932686
0610005C13Rik	1.50052	6.87447	1.76721e-08	1.17045e-07
Gm21691	1.49885	6.91713	5.12969e-08	3.01827e-07
Dnajc14	1.49739	8.72951	2.37935e-11	3.74819e-10
Cd81	1.49697	3.83024	0.00236199	0.00447714
Kdm1b	1.49641	10.1097	2.01464e-13	6.97015e-12
Tomt	1.49037	9.83075	2.77351e-13	9.06317e-12
Gm10658	1.49036	6.71784	4.20955e-07	1.97503e-06
Gm9988	1.4899	7.77547	2.26442e-08	1.46061e-07
Gm43791	1.48727	5.02486	0.000408781	0.000905501
Gon4l	1.48672	7.21816	3.54586e-08	2.16698e-07
Gpank1	1.48531	4.16925	0.00151717	0.002986
Gm20628	1.48517	4.25506	0.00335633	0.00616392
Paip2	1.4794	5.15831	7.71314e-05	0.000201972
Gm16272	1.47641	8.53947	6.16061e-11	8.54704e-10
Gm45022	1.47576	5.36618	7.11186e-05	0.000188596
Gm15938	1.47156	5.34195	0.000108588	0.000275583
Spef1	1.46872	8.8449	6.2669e-11	8.6641e-10
Gm12356	1.46539	8.26426	1.89579e-10	2.19823e-09
Ydjc	1.4635	8.29291	1.11642e-10	1.42859e-09
Gm48045	1.46298	8.78041	1.40978e-11	2.40988e-10
Cacfd1	1.46106	4.63711	0.000329033	0.000746841
Ipo7	1.45845	4.43647	0.00136321	0.00271543
Gm16121	1.45662	6.64886	1.99342e-07	1.01181e-06
Rps2	1.45501	4.21791	0.0111594	0.0183851
Rpgrip1	1.45474	9.88205	2.04803e-13	6.97015e-12
Lpcat3	1.45372	7.22137	4.85651e-08	2.87464e-07
Pcsk7	1.45335	5.05179	0.000129173	0.000322036
Rapgef3	1.45134	4.16052	0.00391873	0.00710765
Ccnl2	1.45121	4.63638	0.000313581	0.000715052
Gm43684	1.44855	3.90269	0.00888075	0.0149487
Ankrd28	1.44712	4.45818	0.000717213	0.00150443
Zranb2	1.44352	3.96722	0.00350965	0.00643056
Gm12977	1.44155	8.69727	1.36947e-11	2.37495e-10
Pip4k2b	1.43786	3.85379	0.00322998	0.00594569
Mettl5	1.43619	10.053	7.82096e-14	3.36131e-12
Spout1	1.43611	7.20244	1.70498e-08	1.13303e-07
Yipf3	1.43044	3.86067	0.00446548	0.00797855
Snw1	1.42971	5.46431	5.53535e-05	0.000150528
Asxl1	1.42706	4.47427	0.000981681	0.00200909
Rbm3os	1.42697	10.7235	1.26151e-13	4.83663e-12
Gm17122	1.42162	8.84578	1.45118e-10	1.77097e-09
Rapgef1	1.42024	4.21153	0.00333085	0.00612282
Trub2	1.41953	5.06083	0.000110457	0.000279965
Dok4	1.41685	6.45102	4.24276e-07	1.98766e-06
Rxrb	1.41136	4.06916	0.00658587	0.0113963
Sla2	1.40964	10.1535	2.5719e-12	5.87821e-11
Gm48933	1.40535	7.54116	3.59896e-09	2.89233e-08
A130006I12Rik	1.40479	4.24361	0.00232731	0.00441564
Top1	1.40447	3.97551	0.00419345	0.00755394
Rab21	1.40238	4.78663	0.000334638	0.00075739
Bcs1l	1.40154	4.03618	0.0017005	0.00331384
Slc24a5	1.40133	8.54761	3.91874e-11	5.73877e-10
Abhd14b	1.40122	4.97375	0.0001965	0.000468896
Gabpa	1.40003	8.07437	2.32639e-10	2.61322e-09
Gm20406	1.39985	8.03203	4.81774e-09	3.7303e-08
Supt20	1.39783	7.17093	2.06153e-08	1.34552e-07
Npm1	1.39412	6.73062	1.74981e-05	5.34532e-05
Gm43118	1.39406	9.33585	1.83581e-11	2.99949e-10
Gm38155	1.39392	6.33834	5.92005e-06	2.03902e-05
Fam83f	1.39243	4.10417	0.00634213	0.0110034
Gm8373	1.39172	7.08344	2.41137e-08	1.54032e-07
Fancf	1.38854	3.96363	0.00687484	0.0118239
Gm15927	1.38789	8.72492	3.08859e-10	3.33669e-09
Tmem123	1.38756	5.97758	1.43977e-05	4.47905e-05
Xpa	1.38633	8.09115	1.65726e-09	1.46595e-08
Prpf39	1.3858	9.99613	1.08991e-12	2.91184e-11
Ggnbp1	1.38501	8.45552	5.8894e-11	8.22851e-10
Oip5os1	1.38354	4.79822	0.0002547	0.000592055
Gm17477	1.3823	8.44217	8.12352e-11	1.09253e-09
Rps26	1.3774	5.68839	1.11025e-05	3.5546e-05
Zdhhc2	1.37578	8.50087	4.13632e-10	4.3254e-09
Tomm6os	1.37563	10.1978	7.52199e-14	3.30466e-12
7530414M10Rik	1.37009	5.06527	0.000241569	0.000564852
Gm12500	1.37	7.21858	7.70846e-08	4.37292e-07
Gm50256	1.36689	5.42119	4.53954e-05	0.00012596
Canx	1.36257	4.12543	0.0126404	0.0205174
Tmem262	1.36099	3.87266	0.0181429	0.0284445
Ptcd1	1.35968	9.33509	1.51274e-11	2.55615e-10
B3gntl1	1.35601	7.45311	1.46065e-08	1.00103e-07
Fbl-ps2	1.35005	6.57333	4.8275e-07	2.22541e-06
Gm45053	1.3493	5.91263	1.05228e-05	3.38544e-05
Noxo1	1.34811	4.51813	0.000819269	0.00170674
Mpp1	1.34718	5.70798	1.49938e-05	4.64986e-05
Gm16282	1.34673	5.2903	0.000983772	0.00201233
Hspa9	1.34549	3.94966	0.00470617	0.00836323
Tap1	1.34329	5.66481	3.90622e-05	0.000110087
Gm15884	1.3423	10.859	1.77656e-13	6.32839e-12
Gm13427	1.34137	7.25034	1.18709e-07	6.34291e-07
Gm17089	1.34014	6.0105	3.29329e-05	9.47029e-05
Ccnd3	1.33919	4.62043	0.000530644	0.00114279
2200002D01Rik	1.33724	7.82395	2.1512e-09	1.82652e-08
Cenpq	1.33707	5.40058	0.000140176	0.000345977
Gm15540	1.33676	5.13199	0.000150991	0.00037059
Maip1	1.33359	5.2452	0.000405648	0.000899065
Rpl41	1.33338	4.16849	0.00174304	0.00338838
Gm37539	1.32948	6.0387	2.12406e-05	6.33851e-05
Gm45758	1.32677	6.42572	2.10936e-06	8.24151e-06
Cmtr1	1.32651	7.95073	2.43174e-09	2.03279e-08
Gm11508	1.32541	10.6002	2.3231e-13	7.78435e-12
Wapl	1.32488	4.6738	0.000854817	0.00177705
Gm10644	1.32373	5.95638	1.25732e-05	3.96765e-05
Gm45244	1.32263	4.12911	0.00271943	0.005072
Sod1	1.31984	4.66792	0.0023959	0.00452406
Btbd18	1.31783	4.50911	0.00297466	0.00550647
Gadl1	1.31686	6.13973	4.28894e-06	1.53193e-05
Ccna2	1.31535	8.59656	7.80641e-10	7.49188e-09
H2aj	1.30764	3.79401	0.0209521	0.0323485
Gm10767	1.30505	8.33549	3.24283e-10	3.48427e-09
Rnf34	1.30397	7.9639	6.71322e-09	5.01778e-08
A230005M16Rik	1.30269	10.8634	3.80836e-14	1.90611e-12
Stard6	1.30101	4.3278	0.00360103	0.00657666
Gm48226	1.30069	4.5561	0.00192767	0.00371081
Pfkp	1.29999	7.40582	2.78458e-08	1.74591e-07
Gm17638	1.299	11.9594	3.01065e-14	1.52617e-12
Zbtb12	1.2947	4.21278	0.00406644	0.00734524
Raly	1.29256	4.55374	0.00110464	0.00223642
Gm47483	1.28964	4.71871	0.00065726	0.00139047
E130317F20Rik	1.28725	9.95506	1.78286e-12	4.49007e-11
Dnajb13	1.28636	7.92995	8.48501e-09	6.20246e-08
Ctdnep1	1.28539	5.43206	0.000122873	0.000308077
Cideb	1.28495	6.11904	3.46721e-05	9.93431e-05
Eml5	1.28396	8.71345	3.55771e-10	3.77136e-09
Txlng	1.28178	4.30979	0.00175801	0.00341246
Gm44170	1.28133	10.7011	1.3284e-13	5.00237e-12
Gm15672	1.27961	7.06803	1.0159e-07	5.54817e-07
Inpp5e	1.27547	9.45348	1.29999e-10	1.61134e-09
Dek	1.27293	5.11386	0.000889341	0.00184301
Phax	1.27173	4.71107	0.000864791	0.00179684
Btd	1.27059	4.03027	0.00376762	0.00686189
Otulin	1.26804	4.91764	0.00188973	0.00364487
Gm17092	1.26783	11.4796	7.66905e-14	3.33224e-12
Gm49383	1.2647	7.88876	2.85925e-09	2.34553e-08
Eif3b	1.26467	4.48469	0.00127223	0.00254962
Macroh2a1	1.26017	5.55773	4.477e-05	0.0001244
C030014I23Rik	1.25867	4.69181	0.00182064	0.00352364
Myo19	1.25786	6.55628	3.36843e-06	1.2378e-05
Gm15964	1.25756	9.98686	3.8866e-10	4.0763e-09
U2surp	1.25746	3.90513	0.0051669	0.00910829
Map3k12	1.25626	11.7908	3.55141e-15	2.86577e-13
Serhl	1.25251	9.32136	2.21099e-11	3.4969e-10
Gm16796	1.25064	6.84565	5.34539e-07	2.40725e-06
Rhoq	1.25063	7.49887	2.13831e-08	1.38378e-07
Gm16163	1.25059	7.15535	1.41345e-07	7.41213e-07
B430218F22Rik	1.25027	9.50354	3.81387e-11	5.64795e-10
Tmed5	1.24982	9.11925	4.78844e-11	6.89005e-10
Inppl1	1.2496	4.10303	0.0133887	0.0215901
Tjp3	1.24913	4.50193	0.0021802	0.0041645
Mcm9	1.24623	9.12879	9.99141e-11	1.31687e-09
Hoxb3os	1.24566	4.29365	0.00290808	0.00539958
Yipf2	1.24185	9.39409	6.86495e-10	6.66929e-09
Gm26787	1.24124	7.22858	1.02125e-07	5.56199e-07
6430511E19Rik	1.23526	4.08702	0.00676568	0.0116577
Rhbdd3	1.23269	9.73047	2.18325e-12	5.36185e-11
Gm17134	1.23063	10.9491	1.25729e-13	4.83663e-12
Tmpo	1.22573	4.11762	0.00523717	0.00920755
Sco2	1.22342	7.17614	3.80145e-07	1.80444e-06
Rmi1	1.22025	10.1484	2.42986e-12	5.78776e-11
Gm42884	1.22017	5.8878	2.69473e-05	7.85185e-05
Eaf1	1.21554	6.71562	7.34566e-07	3.19876e-06
Calm3	1.21475	4.82217	0.00209349	0.00400467
Gm17017	1.21341	9.52371	1.59869e-10	1.9188e-09
Endog	1.21175	8.20377	3.47787e-09	2.80643e-08
Gm10535	1.21033	5.28048	0.000526668	0.00113547
Gm38316	1.20794	8.05061	7.256e-09	5.3929e-08
Arpc1b	1.2063	6.74965	6.61642e-06	2.26505e-05
Ap4m1	1.20524	9.40722	1.22796e-11	2.17969e-10
Gm12898	1.20377	6.97321	5.43426e-07	2.44449e-06
Snapin	1.20216	6.43247	5.85509e-06	2.02049e-05
0610040F04Rik	1.19908	7.29756	1.88184e-07	9.65083e-07
Gm11842	1.19499	3.85329	0.0170793	0.0269265
Dnajc19	1.19241	9.17476	4.79202e-11	6.89005e-10
Atp1a1	1.19231	4.19942	0.0118395	0.0193684
Surf2	1.19138	7.1224	7.173e-07	3.13341e-06
Atl1	1.19026	10.4671	8.08884e-12	1.56016e-10
Prorp	1.18561	6.37857	3.74861e-06	1.36106e-05
Gm16793	1.18535	6.84505	4.3579e-06	1.55375e-05
B230322F03Rik	1.18506	7.05581	9.22078e-07	3.92454e-06
Pspc1	1.18199	4.37789	0.0125891	0.0204508
Gm45732	1.1797	7.49704	4.12803e-07	1.94544e-06
A930028N01Rik	1.17873	3.9473	0.0205498	0.0318269
Hsp90aa1	1.17864	6.13393	0.000128537	0.000320654
Ttll5	1.17544	5.36122	0.00047545	0.00103863
Gm43729	1.17412	4.10545	0.00642135	0.0111311
Tvp23a	1.17254	10.8474	3.2891e-13	1.0422e-11
Rpl28	1.17195	6.18644	2.66375e-05	7.7673e-05
Smyd5	1.17176	4.97192	0.00109035	0.00220977
Map3k15	1.16942	10.0049	2.26878e-12	5.43682e-11
Acss2	1.16614	4.93003	0.000754848	0.00157752
Gm11592	1.16519	6.62631	3.29108e-06	1.21503e-05
Spopl	1.16443	4.43494	0.0150391	0.0240067
Rad54l	1.16306	5.877	3.7494e-05	0.000106502
Gm15559	1.1615	8.48258	4.0967e-09	3.25268e-08
Gm29773	1.15684	6.9013	2.46257e-06	9.38055e-06
Tbcb	1.15671	7.12974	3.93281e-07	1.86009e-06
1700027A07Rik	1.15516	5.91723	0.000101449	0.000258793
Abi1	1.15462	4.61847	0.00413891	0.00746589
Lsmem2	1.15294	7.99132	3.81507e-06	1.38266e-05
Stat3	1.14914	5.45282	0.000365534	0.000819342
mt-Nd1	1.14809	7.17531	0.000223886	0.000527875
Gm11583	1.1463	9.96791	1.96489e-10	2.25639e-09
Gm14232	1.14229	4.35525	0.00448389	0.00800782
Gm14471	1.14154	8.93837	3.46364e-10	3.69143e-09
Entr1	1.14151	5.18932	0.00137866	0.0027393
Gm45187	1.14108	9.29242	1.03617e-10	1.35663e-09
BC024978	1.14025	9.75549	1.45916e-11	2.47619e-10
Ccdc73	1.13997	7.8731	2.46322e-08	1.56703e-07
Yrdc	1.13933	5.33421	0.000552841	0.00118543
Igsf6	1.1345	3.8514	0.0115938	0.0190136
Mtdh	1.13301	6.41676	1.24699e-05	3.93817e-05
Gm45236	1.13139	7.55537	8.30062e-08	4.65541e-07
Crbn	1.12322	8.79002	3.14509e-08	1.94308e-07
Gm16033	1.12017	8.43696	1.73079e-08	1.14825e-07
Rnf139	1.11951	5.92372	7.51432e-05	0.000197551
Oaz3	1.11573	9.14674	7.98024e-10	7.64016e-09
Rpl22l1	1.11393	4.92742	0.00174604	0.00339256
Mea1	1.11278	7.87997	1.95058e-07	9.95175e-07
Gm44616	1.1081	7.02525	2.42931e-06	9.27173e-06
Dalrd3	1.10642	9.18568	2.23306e-09	1.88665e-08
Tmem88	1.10622	8.17322	9.76595e-09	6.99539e-08
Gm17949	1.1027	6.28796	2.52362e-05	7.41889e-05
Hspd1	1.10159	4.12736	0.0101516	0.01692
4930556J24Rik	1.10088	9.8723	1.14254e-09	1.0506e-08
Gm9502	1.09834	7.8637	8.23658e-08	4.62605e-07
Ptma	1.09582	7.17097	0.000964317	0.0019797
Nif3l1	1.09445	9.32779	4.14219e-09	3.28221e-08
Scpep1os	1.09284	8.81731	2.30243e-09	1.93698e-08
Polr3h	1.0915	7.90644	8.61086e-08	4.80895e-07
Gm4430	1.0899	6.60217	9.98581e-06	3.22844e-05
Lrwd1	1.08791	8.53903	3.93254e-09	3.12862e-08
Nol3	1.08677	6.72257	1.23083e-05	3.90271e-05
Sptbn2	1.0856	4.0645	0.016936	0.0267433
Stk11	1.08514	3.92956	0.014447	0.0231175
Gm10252	1.08507	12.1728	2.30167e-14	1.264e-12
Plppr3	1.08465	11.3527	4.77057e-13	1.429e-11
Ncl	1.08094	6.71414	0.000669483	0.00141331
Gm15243	1.08081	6.81717	3.94814e-06	1.42566e-05
Cct5	1.07771	4.01869	0.0285763	0.0427348
Hcfc1r1	1.07509	8.16309	2.06218e-08	1.34552e-07
Plpp1	1.07397	7.1181	3.53447e-06	1.28977e-05
B230334C09Rik	1.07222	5.52968	0.000354572	0.000797938
Gm42858	1.06994	6.86173	4.1833e-05	0.000117227
Gm37710	1.06956	4.63572	0.00749538	0.01278
Plod3	1.06886	6.81051	1.33324e-05	4.18717e-05
Tbc1d10b	1.06703	4.63543	0.00676607	0.0116577
Pabpc1	1.06386	5.37871	0.00104408	0.00212469
Gm16059	1.06228	8.04229	4.99262e-08	2.9508e-07
Tubb5	1.06012	4.57344	0.00663753	0.0114784
Gm16982	1.059	8.18532	2.47795e-08	1.57268e-07
Gm43126	1.05844	7.97095	9.89072e-07	4.16929e-06
Ost4	1.05689	7.01074	9.5844e-06	3.10884e-05
Pdia3	1.05261	4.90725	0.0025894	0.00485697
Gm37500	1.05162	5.85561	0.000344214	0.000775954
Gm10130	1.0515	4.23023	0.0155998	0.0248615
1700120K04Rik	1.051	4.52536	0.00491946	0.00870314
Tbc1d22bos	1.04934	6.63896	8.08566e-06	2.68661e-05
Rad51	1.04669	6.98801	7.55649e-06	2.54e-05
Calr	1.04583	5.32826	0.00677557	0.0116684
Gm45133	1.04402	8.51415	8.61174e-09	6.28244e-08
Mtf1	1.0427	6.98406	2.91046e-06	1.08771e-05
BC028777	1.04156	5.31203	0.00118719	0.00239009
Cebpd	1.03995	7.193	4.1889e-06	1.50026e-05
mt-Nd4	1.03903	6.79874	1.32925e-05	4.18128e-05
Gm6598	1.03796	7.90962	1.20409e-07	6.41643e-07
Nudt5	1.03729	7.37233	4.21079e-07	1.97503e-06
Cpsf2	1.03644	6.25734	0.000168523	0.000407547
Gm48141	1.0351	5.60363	0.000557144	0.00119401
Chmp4b	1.03488	4.99185	0.00420969	0.0075758
Thoc1	1.03281	7.06128	5.98117e-06	2.05827e-05
Fbxl12	1.03006	5.63873	0.000658896	0.00139245
Tcp1	1.02969	4.49999	0.011318	0.0186154
Ankrd42	1.02664	6.3669	6.00458e-05	0.000162284
Cops3	1.02472	5.13762	0.00289871	0.00538857
Gm28592	1.02466	7.13711	1.34476e-05	4.21998e-05
Gm13068	1.02149	6.36699	0.000132775	0.000329768
Psme3ip1	1.0214	5.73067	0.000378731	0.000845569
Atic	1.02098	4.88677	0.00285218	0.00530707
Gm7008	1.02085	8.04779	3.63245e-07	1.74094e-06
Tcerg1	1.02075	4.59273	0.0073655	0.0125856
Nkiras1	1.01961	9.83679	2.22514e-10	2.51377e-09
Mypop	1.01946	6.96527	7.21121e-06	2.43494e-05
Nkapd1	1.01886	7.09671	1.94562e-05	5.88598e-05
Gm26646	1.0161	7.37278	5.67766e-07	2.53666e-06
Tmem80	1.01585	5.5111	0.000581131	0.00124339
Slc48a1	1.01477	6.55228	4.46119e-05	0.000124135
Tyw5	1.01402	7.56136	3.61424e-07	1.73431e-06
Mrm1	1.01155	5.42656	0.00100664	0.00205699
1500002C15Rik	1.00945	9.56473	4.146e-10	4.3254e-09
Doc2a	1.00707	9.65547	1.10848e-09	1.02404e-08
Gm42893	1.00631	7.06975	1.29805e-05	4.08639e-05
Mrpl19	1.00541	7.40456	2.59167e-06	9.825e-06
Gm15853	1.00459	7.30092	2.44779e-06	9.33323e-06
Gm45242	1.00416	7.27725	8.47539e-06	2.79264e-05
Agbl5	1.00276	10.4874	3.28827e-11	5.02329e-10
Ppip5k2	1.00252	5.24321	0.0014863	0.0029311
Gm17029	1.00223	9.25284	2.52725e-09	2.09932e-08
Gm43737	1.00202	9.22877	7.72168e-08	4.37414e-07
1810008B01Rik	1.00028	7.65796	5.71765e-07	2.54877e-06
Gm6934	-1.00028	6.25589	0.000113037	0.000285772
Gm16759	-1.00178	7.15682	7.00434e-06	2.37931e-05
Gm20531	-1.00252	11.7434	1.31992e-12	3.4237e-11
Gm44040	-1.00283	7.26153	2.82878e-06	1.0622e-05
Mir6357	-1.00856	6.04587	0.000485977	0.00105812
Gm20659	-1.0105	6.25111	0.000356216	0.000800727
Malt1	-1.01203	4.08279	0.0289167	0.0431948
Pptc7	-1.01221	5.32326	0.00218928	0.00417982
Mrgbp	-1.01231	4.36533	0.0222563	0.0341886
Gm42733	-1.0126	6.3166	0.000127956	0.000319405
Lamtor4	-1.01371	4.76345	0.00738044	0.0126057
Gm22249	-1.01901	4.42439	0.0232618	0.0355949
Bet1l	-1.01935	6.32144	0.000392424	0.000871221
Gm10634	-1.01941	6.20637	0.000467607	0.00102207
Lipt1	-1.02049	4.22719	0.0154408	0.024628
Man2c1	-1.02055	4.48937	0.0103529	0.0172142
Nedd9	-1.02214	5.8622	0.000684396	0.00144325
Ctbs	-1.02341	3.797	0.0310952	0.0462049
Gm43660	-1.02385	6.77758	3.60307e-05	0.000102863
Zeb2	-1.02828	5.64719	0.00143398	0.00283782
Gm29477	-1.02965	7.70948	9.51565e-07	4.04568e-06
Pde7a	-1.02994	5.51924	0.00167418	0.00327061
Cpsf4l	-1.03168	4.25149	0.0183427	0.0287122
1700120B22Rik	-1.03451	8.44243	6.23021e-08	3.61206e-07
Ddx42	-1.03518	5.32242	0.00345428	0.00633498
Rasal3	-1.03968	4.90511	0.0121185	0.0197594
Zfp974	-1.04276	4.65637	0.0106057	0.0175975
Gm43592	-1.04287	4.35125	0.0108065	0.0178708
Vcl	-1.04396	5.10297	0.0086604	0.0146026
Lztr1	-1.0444	5.88758	0.000302044	0.000691135
Gm49085	-1.04545	6.96357	1.07623e-05	3.45967e-05
E130116L18Rik	-1.04659	6.54541	2.02101e-05	6.07686e-05
Tpm3	-1.04706	4.55253	0.00791628	0.0134454
Gm26513	-1.0476	5.91929	0.000165191	0.000400714
Cmah	-1.04766	5.15564	0.00295261	0.00547076
Slc31a2	-1.04774	5.81829	0.000303747	0.000694229
Ccni	-1.04945	4.4243	0.0113307	0.0186286
Gm16731	-1.05236	8.94665	1.90962e-09	1.65948e-08
9330104G04Rik	-1.05263	4.16686	0.0214642	0.0330489
Gm26782	-1.05275	4.85715	0.00495131	0.00875168
A430035B10Rik	-1.05433	6.48017	0.0001127	0.000285285
Gm28529	-1.05581	8.32206	1.63383e-08	1.09867e-07
Esco1	-1.05874	5.39351	0.00118162	0.00238009
Kif22	-1.05962	4.80559	0.00706865	0.0121203
Gm10817	-1.06923	6.7075	2.54554e-05	7.4722e-05
Gm42928	-1.06967	9.70864	1.28706e-10	1.60033e-09
Ypel1	-1.07227	6.62897	1.8341e-05	5.5742e-05
Leng9	-1.07283	8.51803	5.48014e-07	2.45953e-06
Tdo2	-1.07298	4.56536	0.0204678	0.0317123
Gm30054	-1.07414	6.7228	9.96514e-06	3.2244e-05
Hnrnph3	-1.07435	4.72347	0.0164836	0.0260704
Dapp1	-1.07538	4.17796	0.0126111	0.0204781
Itga4	-1.07561	6.45438	7.78127e-05	0.000203621
Gm44101	-1.08016	7.8776	8.91883e-08	4.95296e-07
Znfx1	-1.08179	4.83882	0.00617535	0.0107423
Gm32401	-1.08221	8.39	7.30986e-08	4.18281e-07
Kdm3b	-1.08358	3.51648	0.0271425	0.0408532
Kmt2d	-1.08403	4.25082	0.0135064	0.0217621
Kmt2e	-1.08613	5.00865	0.00676642	0.0116577
Pgls	-1.08983	4.44134	0.019104	0.0297859
Ovol1	-1.09041	4.05834	0.0217554	0.0334582
Raf1	-1.09308	6.78648	7.85055e-06	2.6195e-05
Scand1	-1.09387	5.61746	0.000326241	0.000742208
Shmt1	-1.09437	6.9288	2.71213e-06	1.02229e-05
Ppp2r5a	-1.09536	5.71235	0.00118839	0.00239129
Gm26724	-1.09741	7.54088	4.0613e-07	1.91856e-06
Tmem208	-1.09805	6.54956	4.40418e-05	0.000122635
Orm2	-1.09964	5.18092	0.00186406	0.0036024
D530033B14Rik	-1.10046	5.81733	0.000126781	0.000316872
Snx21	-1.10103	7.46028	2.27434e-06	8.7734e-06
Pkn1	-1.10112	4.14997	0.0137836	0.0221546
Scn4a	-1.103	3.6075	0.023607	0.0360116
Gm20402	-1.10317	10.3135	4.85011e-12	1.02007e-10
Ghrl	-1.10352	4.53699	0.008789	0.0148006
Sh2b3	-1.10486	5.56967	0.00205595	0.0039424
Gm14508	-1.10616	4.37619	0.021153	0.0326204
Sp140	-1.10791	5.27493	0.00704829	0.0120906
Ier5	-1.11023	4.9952	0.00248568	0.00468241
Zfp746	-1.11024	4.18079	0.0111901	0.0184204
Gm45051	-1.11113	8.01204	2.58983e-08	1.63843e-07
Gm44226	-1.11565	8.33233	2.44852e-07	1.22241e-06
Brpf1	-1.11627	3.81778	0.0178	0.0279958
Gm20511	-1.1209	10.2629	2.05164e-11	3.2579e-10
Mrps34	-1.12229	4.31329	0.0170279	0.0268561
Gm15893	-1.12313	4.58272	0.00751001	0.0127939
Lysmd1	-1.12343	4.66921	0.00563539	0.00987255
Lmbrd1	-1.12418	4.92582	0.00290183	0.00539185
Pi4ka	-1.12516	7.78034	8.18771e-08	4.61171e-07
Abhd11os	-1.12557	5.06292	0.00114732	0.00231454
Serinc4	-1.12627	9.70187	2.55733e-10	2.8415e-09
Man2a2	-1.12795	4.73218	0.00487122	0.00862167
Hnrnpk	-1.12993	7.00638	2.01915e-06	7.92036e-06
Rassf5	-1.13045	4.03418	0.0106645	0.0176802
Lrig1	-1.13062	3.67492	0.0195979	0.0304839
Dgcr8	-1.13091	3.90221	0.0156626	0.0249215
Vps9d1	-1.13247	5.75035	0.000420335	0.000927976
Gm10840	-1.1337	6.24753	9.18192e-05	0.000236517
Zbtb7b	-1.13388	4.01122	0.0146621	0.0234522
C920021L13Rik	-1.13444	8.64946	5.11969e-09	3.91564e-08
Mir6244	-1.13714	3.90483	0.0155319	0.0247634
Ppp1r18	-1.1391	5.6593	0.000255632	0.000593523
Mir135a-1	-1.14347	4.5047	0.00623426	0.0108353
Gm48283	-1.14575	8.14461	1.51989e-07	7.89702e-07
Dock11	-1.1465	4.18779	0.0139756	0.0224267
Gm12276	-1.14792	3.88295	0.0188587	0.0294267
Lrrc51	-1.14897	5.87905	0.0148596	0.0237298
Gm16573	-1.15231	8.26481	1.10105e-07	5.92318e-07
Hectd1	-1.15335	4.92284	0.00228488	0.00434556
Akap13	-1.15421	5.43207	0.000687874	0.00144982
Os9	-1.15672	5.72902	0.000509636	0.00110235
Chd7	-1.15867	3.62034	0.0170037	0.0268286
Phf10	-1.16239	5.73737	0.000127152	0.000317598
Cog5	-1.16281	7.24073	5.17532e-07	2.34133e-06
Gm15978	-1.1666	8.09751	8.98441e-09	6.53021e-08
Gm36423	-1.16703	9.13349	3.11363e-10	3.35458e-09
Zfp473	-1.168	4.74568	0.00754154	0.0128421
B630019A10Rik	-1.16845	6.14548	0.000157868	0.000385314
Atg16l2	-1.16985	6.5381	7.67081e-05	0.00020113
Qk	-1.17041	3.91186	0.0121774	0.0198472
Fbxw2	-1.17072	6.04888	4.6121e-05	0.000127529
Psip1	-1.17493	7.06246	3.44503e-06	1.2636e-05
Baz2a	-1.1781	5.8786	0.000149657	0.000367542
Scd1	-1.17979	5.74862	0.000390022	0.000867019
BC051537	-1.18038	10.782	2.02705e-11	3.23184e-10
Sult6b1	-1.18114	4.26178	0.0119914	0.0195764
Ncf1	-1.18216	4.11135	0.0133795	0.0215841
Usp24	-1.18422	3.78003	0.0131654	0.0213082
Inka2	-1.18427	4.09949	0.00741063	0.0126518
Ncor1	-1.18507	6.82398	1.66267e-06	6.66756e-06
Gm39326	-1.18839	6.88977	3.93981e-06	1.42395e-05
Tmem67	-1.18921	5.09144	0.00166347	0.00325291
Hmox2	-1.18976	6.37955	1.56834e-05	4.84849e-05
H2-D1	-1.19243	6.27896	2.52753e-05	7.42487e-05
A630072L19Rik	-1.19266	9.72537	1.57719e-11	2.64678e-10
Gm15777	-1.19336	6.80249	8.60866e-06	2.82948e-05
Gm26891	-1.1938	4.562	0.00401905	0.00726959
Gm16599	-1.19673	6.55358	1.57335e-05	4.86018e-05
Pkd2l2	-1.19734	8.73434	3.88422e-09	3.10267e-08
Bcl9l	-1.2065	8.18026	5.2209e-09	3.96989e-08
A230072E10Rik	-1.20651	5.99387	0.000154127	0.000377116
Gm49864	-1.20723	5.89466	0.00011281	0.000285381
H2-Aa	-1.21003	5.30898	0.00283132	0.00527321
Smarcd1	-1.21016	4.11182	0.0234674	0.0358539
Gm5901	-1.21285	5.23068	0.000580246	0.00124217
Sgf29	-1.21499	5.14903	0.00104232	0.0021233
Gm36043	-1.21765	8.55821	1.21122e-08	8.5827e-08
Gm50254	-1.21865	7.89428	4.81074e-08	2.85182e-07
Fgf2	-1.2192	7.40752	2.43456e-07	1.21697e-06
Gm47641	-1.21964	4.86203	0.00253318	0.00476055
Gm25600	-1.22036	4.46702	0.00368475	0.00672336
9330175E14Rik	-1.22067	4.89059	0.00164293	0.00321591
B230319C09Rik	-1.22208	3.49383	0.0139655	0.0224205
Rabep2	-1.22405	5.05698	0.00108327	0.00219655
Gm16575	-1.22515	8.98894	1.20104e-10	1.51239e-09
Gm13331	-1.22631	5.90233	3.05566e-05	8.83839e-05
Ubtf	-1.22968	5.81502	7.68489e-05	0.000201365
Gm38058	-1.2312	5.41914	0.000176164	0.000423694
Gp1ba	-1.234	5.5657	0.000234873	0.000550172
1700034H15Rik	-1.23727	6.52702	4.94067e-06	1.73494e-05
Rfx1	-1.23744	3.56214	0.0279769	0.0419495
E130307A14Rik	-1.23744	8.42472	2.38899e-09	2.00554e-08
Zhx3	-1.23871	4.91925	0.0010301	0.0020995
Gm50315	-1.23885	8.25989	2.70671e-09	2.23431e-08
4930470G03Rik	-1.2399	8.9739	1.02395e-10	1.34509e-09
Gngt2	-1.24078	7.1976	1.59886e-06	6.4312e-06
Clic3	-1.24201	6.19413	2.31637e-05	6.86061e-05
D630008O14Rik	-1.24361	8.63192	2.92593e-10	3.20474e-09
C730034F03Rik	-1.2442	7.79008	1.63351e-08	1.09867e-07
Gm16042	-1.24475	9.77065	1.4503e-10	1.77097e-09
Gm38160	-1.24622	6.77774	5.7359e-06	1.98771e-05
Ryr1	-1.24636	5.75704	0.000135874	0.000336621
Trp53tg5	-1.24639	4.11301	0.00590235	0.0103083
Map3k3	-1.24726	6.28933	5.75078e-05	0.000155827
Proz	-1.25065	6.95175	1.96718e-06	7.74723e-06
Clstn1	-1.25413	5.04728	0.00102833	0.00209804
Fbxl3	-1.25529	4.61665	0.00250834	0.00471823
Galnt6os	-1.25535	7.65521	3.7108e-08	2.25384e-07
Idua	-1.26259	4.75051	0.0024914	0.00469094
Pdcd2	-1.26266	4.32085	0.0039434	0.00714584
Gm15886	-1.26407	9.70496	1.17317e-11	2.09897e-10
A130010J15Rik	-1.26573	8.79462	4.38139e-09	3.44414e-08
Arid1b	-1.26752	4.73398	0.00207466	0.00397442
Son	-1.26791	7.0786	1.4305e-06	5.80717e-06
Gli1	-1.26797	5.93576	8.32535e-05	0.000216711
A730061H03Rik	-1.26819	6.7812	6.95965e-07	3.0576e-06
Iffo2	-1.26863	4.03522	0.0110057	0.0181698
Nek11	-1.26929	4.96094	0.000703081	0.00147655
Gm42502	-1.27106	4.08409	0.00436943	0.00782815
B4galt3	-1.27423	4.91949	0.000613495	0.00130839
Cherp	-1.27788	4.96607	0.00116524	0.00234829
Tuba4a	-1.28198	5.56717	0.000191296	0.000457582
Gm45411	-1.28259	6.04887	1.69176e-05	5.18946e-05
C030006K11Rik	-1.28762	4.58572	0.00521533	0.00917324
Gm16093	-1.28951	7.93498	5.962e-09	4.4732e-08
Hdac5	-1.28991	4.592	0.00168251	0.00328201
Gm26879	-1.29097	8.27058	4.35957e-09	3.44067e-08
Itpkc	-1.29222	3.72062	0.0101549	0.01692
Dgkd	-1.29421	4.46091	0.00382925	0.0069613
Abcb10	-1.29543	5.37872	0.00207025	0.00396789
Flicr	-1.30048	5.03776	0.000642923	0.00136453
Gm37127	-1.30232	6.58627	1.89737e-06	7.50222e-06
Tor4a	-1.30495	6.6195	2.10175e-05	6.28617e-05
4732487G21Rik	-1.31021	8.25178	5.5916e-09	4.21931e-08
4732471J01Rik	-1.314	8.71177	1.66318e-10	1.96305e-09
Gm17315	-1.31773	5.723	0.000155268	0.000379673
Ciita	-1.32169	3.60976	0.00980563	0.0163662
Cd19	-1.32767	5.85127	0.000333579	0.000755425
Gbp9	-1.32828	3.86073	0.00512387	0.00903648
Ddx17	-1.32886	4.08041	0.0123978	0.0201732
Itpr3	-1.32922	3.5677	0.00966771	0.0161428
Cd72	-1.32925	9.58311	3.29042e-11	5.02329e-10
Rell2	-1.32953	7.20513	8.35297e-08	4.67814e-07
4933430L12Rik	-1.33003	7.02858	3.35813e-06	1.23517e-05
Sirt3	-1.33138	4.2616	0.00402425	0.00727567
Gm48900	-1.33206	6.19997	2.11727e-05	6.32303e-05
Mindy1	-1.33233	5.69438	0.000590229	0.0012615
Raver2	-1.33434	4.23914	0.0035091	0.00643056
Arsg	-1.33741	4.61382	0.00173662	0.00337922
Gm49886	-1.33819	3.93819	0.00683452	0.0117648
Gnl1	-1.33891	5.51935	0.000107238	0.000272682
Naa35	-1.34324	6.59987	6.09043e-06	2.09223e-05
Gm43604	-1.34498	4.73806	0.00131245	0.00262093
Gm17968	-1.34552	4.59985	0.000970092	0.00198949
Stat6	-1.34573	4.68871	0.00107874	0.00219058
Fosl1	-1.34618	3.56614	0.0140964	0.0226022
Vwa7	-1.34678	5.5973	6.83146e-05	0.000181896
Eml3	-1.34847	7.19132	8.34647e-07	3.58717e-06
Nelfb	-1.34878	4.61147	0.00109161	0.00221117
Gm43379	-1.35564	4.32253	0.00481446	0.00854416
Tbl3	-1.35567	5.38565	0.000744344	0.00155804
Dcaf15	-1.35636	4.76893	0.00168142	0.00328201
Gm49911	-1.35983	4.66869	0.00261126	0.00489333
Dtymk	-1.3607	3.82508	0.00550719	0.00966079
Opn3	-1.37068	5.98427	4.21339e-05	0.000117908
Msn	-1.374	5.1018	0.00203485	0.00390763
Eif2d	-1.37555	8.42009	1.17511e-09	1.07556e-08
Ifi203	-1.37719	3.93603	0.0114371	0.0187878
Mier1	-1.37793	3.7418	0.0181948	0.0285033
Gm42585	-1.37871	6.73384	2.47186e-06	9.39782e-06
Pik3c2a	-1.38057	4.4835	0.000931875	0.00191808
Plk4	-1.38816	3.72163	0.00423991	0.00761681
Erbin	-1.39319	3.97215	0.0034175	0.00627044
Gm9768	-1.39445	7.34118	2.78455e-08	1.74591e-07
4930458D05Rik	-1.39591	5.83965	1.04426e-05	3.36237e-05
Pcf11	-1.39845	5.26536	0.000261604	0.000605709
Gga1	-1.40084	4.1041	0.00315822	0.00581901
Ddx5	-1.40404	6.2499	0.000203606	0.000484682
Cisd2	-1.40427	3.99152	0.0105743	0.0175528
Tm6sf1	-1.40522	3.3584	0.00644852	0.0111733
Gm14137	-1.40626	4.66849	0.00137009	0.00272501
Arsa	-1.40786	4.98328	0.000222706	0.000525719
Lrrc75aos2	-1.4083	4.76422	0.00064738	0.00137252
Plp2	-1.41102	4.21275	0.00442823	0.00792425
Nlrc3	-1.41167	4.77085	0.00114819	0.00231512
Pex1	-1.41355	6.8213	2.32737e-06	8.94307e-06
Pcnx3	-1.41569	5.06834	0.000158814	0.000386908
Mfsd14a	-1.41598	4.90842	0.000436696	0.000959809
Tnfrsf22	-1.42001	3.91556	0.0129402	0.020978
2010016I18Rik	-1.42319	7.8356	1.29729e-09	1.17379e-08
Zbtb7a	-1.4243	3.92716	0.0044355	0.00793215
6330409D20Rik	-1.42499	7.60498	2.78621e-08	1.74591e-07
Parp8	-1.42686	3.9076	0.00297212	0.00550433
Gm17137	-1.43056	3.3831	0.00789529	0.0134213
Zmiz1os1	-1.43058	6.54706	4.13529e-06	1.48241e-05
Mef2d	-1.43185	4.27249	0.0013207	0.00263607
A930037H05Rik	-1.43625	8.94476	1.71432e-09	1.51304e-08
Tspan32os	-1.43661	6.49937	1.08913e-06	4.54262e-06
Zfp85os	-1.43667	3.84405	0.00435743	0.00781019
Selenot	-1.43837	3.72766	0.00438178	0.00784672
Brd7	-1.44033	4.73195	0.00062424	0.00132773
Appl2	-1.44331	3.4163	0.00485408	0.00860288
Gm8437	-1.44582	6.30757	1.36719e-05	4.27448e-05
Tgfbr2	-1.44587	3.69248	0.00500036	0.0088286
Gm15478	-1.4466	3.98932	0.00271315	0.00506266
Gm38118	-1.44967	5.05816	0.000234055	0.00054858
Pglyrp2	-1.45114	4.23153	0.00264683	0.00494826
Kat5	-1.45568	5.98918	3.29652e-05	9.47269e-05
Orm3	-1.45861	4.07836	0.0107012	0.0177263
Gm37768	-1.4606	5.12275	0.000356663	0.000801276
Gm10209	-1.46077	6.20783	2.36695e-06	9.06871e-06
Etnk1	-1.46712	5.34392	0.000261284	0.000605579
Gm13031	-1.46767	4.27668	0.000950156	0.00195165
Ppp1ca	-1.47093	6.91315	4.1169e-07	1.94251e-06
Gm49584	-1.471	5.30245	0.000134898	0.000334411
Gm15494	-1.47125	6.01564	0.000703172	0.00147655
Mepce	-1.47141	3.60631	0.0102143	0.016998
Zfp668	-1.47743	8.16702	1.38568e-09	1.24806e-08
Prc1	-1.47956	4.92633	0.000299402	0.000685486
Pmel	-1.48023	7.42078	1.82631e-08	1.20756e-07
Msl1	-1.48169	4.41519	0.00225835	0.00429716
Kpna2-ps	-1.48256	6.97229	7.42206e-07	3.22847e-06
Traf3ip2	-1.48351	6.70064	4.93432e-07	2.26076e-06
Iqgap1	-1.48374	3.85817	0.00300562	0.00555857
Etohd2	-1.48808	9.25953	2.07115e-12	5.18311e-11
H2-Eb1	-1.4909	4.84303	0.00421133	0.0075758
Preb	-1.49204	7.71636	9.31646e-09	6.74675e-08
Map11	-1.49218	4.75187	0.000900686	0.00186261
1700016A09Rik	-1.49441	5.29502	6.93457e-05	0.00018427
H2-Q4	-1.49732	6.45985	5.01269e-07	2.28952e-06
BC049352	-1.49756	3.88439	0.0271672	0.0408693
Kdm2b	-1.49766	5.277	4.54605e-05	0.000126052
Klf3	-1.50086	4.92243	0.000157691	0.000385119
Adgra2	-1.50688	4.25893	0.00148155	0.00292464
Snx5	-1.50914	4.20657	0.00130551	0.00260839
Mir6385	-1.51017	5.41263	3.63104e-05	0.000103438
Cdk13	-1.51504	6.81898	9.31162e-08	5.12074e-07
Grb7	-1.51855	5.46582	0.000535592	0.00115157
Fanca	-1.51933	8.31641	2.28344e-09	1.9251e-08
Gm15477	-1.52396	5.65327	1.61389e-05	4.97415e-05
H2-K1	-1.52853	5.31519	7.90805e-05	0.000206256
Gmpr2	-1.52977	8.37088	8.43536e-11	1.12301e-09
Dtx1	-1.53055	6.4241	2.73502e-06	1.02993e-05
Hmcn2	-1.53171	3.41361	0.00466255	0.00830064
Epha1	-1.53192	3.96999	0.00129585	0.0025917
Slc37a1	-1.53453	3.80104	0.00307416	0.00567471
Gm13204	-1.53565	5.6368	2.10992e-05	6.30583e-05
Mideas	-1.54122	4.04009	0.00141873	0.00281185
Leng8	-1.54159	4.96583	0.000324171	0.000738347
Bcl2l13	-1.54162	4.89947	0.000298275	0.000683698
Taf6l	-1.54299	3.58527	0.00726273	0.0124262
AA386476	-1.54643	4.23076	0.00102968	0.0020995
Gm13477	-1.5494	4.08143	0.00163138	0.00319647
Kmt5b	-1.55084	4.00374	0.0016725	0.00326894
Pitpnm1	-1.55351	5.47607	3.09724e-05	8.95211e-05
1700099I09Rik	-1.55569	5.70592	5.67676e-06	1.97067e-05
Gm37270	-1.55794	7.35582	1.39898e-07	7.34602e-07
Gm12462	-1.5598	4.00722	0.00155991	0.00306554
Dus2	-1.56074	5.15138	0.000101202	0.000258497
Setd2	-1.56395	3.62661	0.00637252	0.0110513
Rbm5	-1.57289	3.49043	0.00606359	0.0105572
Hp1bp3	-1.57325	3.5833	0.00253462	0.004761
Mylpf	-1.57345	5.30896	0.00019576	0.000467413
Smim5	-1.57408	5.28164	7.32544e-05	0.000193607
Gm44987	-1.57663	9.48921	5.57487e-12	1.13041e-10
H2-Pa	-1.57964	4.00094	0.00160523	0.00314835
Fam120c	-1.58158	4.36927	0.000622089	0.00132458
Gm43474	-1.58301	9.00989	1.41771e-10	1.74631e-09
Commd1	-1.5869	7.06017	9.43607e-09	6.79603e-08
Erap1	-1.5874	7.76711	1.90919e-09	1.65948e-08
Gm15747	-1.58818	6.95975	4.33634e-08	2.59786e-07
Diaph1	-1.59009	3.70292	0.0043262	0.00776477
1700001K23Rik	-1.59313	4.86364	0.000163055	0.000396263
Xpo7	-1.59478	4.23109	0.000932574	0.00191852
Serp1	-1.59732	5.61696	0.000104388	0.000265946
Gm37376	-1.59829	10.7464	3.04849e-12	6.73393e-11
Malat1	-1.60018	4.68852	0.000538254	0.00115603
Zfp36l2	-1.60102	4.83785	0.00093558	0.00192371
Pdzd4	-1.60145	4.99691	0.000190058	0.000454897
Gins2	-1.6036	9.57756	4.97659e-12	1.03565e-10
Gm37419	-1.60615	6.38726	5.1333e-07	2.32498e-06
Sec13	-1.60689	3.9942	0.00442908	0.00792425
Gm14966	-1.60952	5.96349	2.19049e-05	6.51217e-05
Kat6a	-1.60962	3.98174	0.00222252	0.00423715
Plec	-1.60997	3.78271	0.00265314	0.00495536
Mvd	-1.61367	5.36759	1.18189e-05	3.7596e-05
Ctcf	-1.61411	5.05903	9.47249e-05	0.000243209
Amt	-1.61508	5.14095	0.000115517	0.000291668
Gm50051	-1.61717	3.94095	0.00113757	0.00229722
Prss53	-1.61793	5.68794	4.98109e-06	1.74758e-05
Baiap2l1	-1.61818	3.59287	0.00485629	0.00860294
A930029G22Rik	-1.61957	5.99014	1.96095e-05	5.91878e-05
Cd180	-1.62189	5.5642	8.097e-06	2.68753e-05
Gm29585	-1.62208	10.8324	7.93744e-15	5.41114e-13
A830052D11Rik	-1.62245	7.94159	4.38454e-10	4.53834e-09
Slc35e2	-1.62464	6.93817	4.51606e-07	2.10076e-06
Gm38162	-1.63236	4.94779	9.4936e-05	0.000243435
Ywhaz	-1.63394	4.04744	0.000648661	0.00137449
Ptpn18	-1.63551	6.20301	3.31031e-07	1.60207e-06
Slc35a4	-1.64259	5.62765	8.80112e-06	2.88076e-05
Dazap2	-1.6431	3.97343	0.00176757	0.00342874
Nme7	-1.64353	3.88821	0.00355768	0.00650651
Nrm	-1.64457	5.61357	1.75992e-05	5.36937e-05
Gm45235	-1.64974	5.26155	0.000107783	0.000273716
Cacnb4	-1.65167	5.25139	5.65873e-05	0.000153672
Gfm2	-1.65463	9.30781	4.06559e-13	1.23657e-11
St8sia4	-1.66033	3.43268	0.0041326	0.00745792
Card14	-1.66034	8.27298	3.67335e-11	5.48092e-10
Map4k2	-1.66192	4.43008	0.00042157	0.000930072
Man2a1	-1.66305	4.81515	0.000104273	0.000265824
Ddx54	-1.66321	5.47419	8.98201e-06	2.93027e-05
Pan3	-1.66337	5.56212	7.23431e-06	2.44066e-05
Gm6293	-1.6642	5.73924	8.7649e-06	2.87128e-05
Trio	-1.6686	4.72985	0.000223374	0.000526982
Api5	-1.6706	6.03789	4.7773e-07	2.20671e-06
Gm43850	-1.67123	4.32208	0.001639	0.00320981
Prox2	-1.67265	4.50964	0.000691706	0.00145711
Gm26587	-1.67831	4.80418	0.000484524	0.00105554
Tlnrd1	-1.68071	3.86807	0.000894944	0.00185267
Nudt19	-1.68676	3.98351	0.00417328	0.00752104
Apc2	-1.68881	4.10586	0.00119449	0.00240234
Gm47827	-1.69364	5.37989	1.43471e-05	4.46682e-05
Gm9208	-1.69465	3.40138	0.00174067	0.00338544
D730005E14Rik	-1.69816	7.94204	1.16693e-10	1.4884e-09
Rarres2	-1.69944	7.9883	3.87122e-11	5.69026e-10
Gm44140	-1.70254	5.80254	1.85589e-06	7.37508e-06
Mis18bp1	-1.70721	4.24744	0.000327246	0.000744065
Gm41442	-1.70861	5.20632	9.485e-05	0.000243372
Fxr1	-1.71685	5.01146	6.15923e-05	0.000166123
Ythdc2	-1.7214	4.69726	0.00017165	0.000414349
Armc6	-1.72318	5.26188	7.84144e-05	0.000204654
Gabpb1	-1.72425	4.88509	3.57943e-05	0.000102262
Tmem62	-1.72471	3.38489	0.00179622	0.0034798
Anks3	-1.72674	5.0627	6.75656e-05	0.000180266
Gm37829	-1.73203	5.88698	4.11949e-06	1.47808e-05
Gm38287	-1.73903	5.96217	3.01698e-06	1.12221e-05
Acss1	-1.74115	4.45412	0.000115781	0.000292149
Gm17334	-1.74835	9.33678	7.16507e-14	3.18322e-12
Rangrf	-1.75192	4.11595	0.000443829	0.000973862
Gm28370	-1.75995	6.31932	2.77595e-06	1.04435e-05
Pisd-ps1	-1.76255	4.74815	0.00062358	0.00132704
Zfp335	-1.76446	8.88364	5.71881e-13	1.66266e-11
Pdpr	-1.76636	5.05556	0.00011863	0.000298198
Gm17022	-1.76708	4.81478	0.000351612	0.000791728
4930595D18Rik	-1.76799	4.12304	0.0043225	0.00776166
Carhsp1	-1.77001	5.42654	5.59387e-06	1.94531e-05
Zscan30	-1.77162	5.63028	1.38658e-06	5.65209e-06
2310043M15Rik	-1.77224	5.8228	1.39857e-06	5.69511e-06
Rom1	-1.77368	3.72842	0.00309197	0.00570491
Ccdc74a	-1.77451	3.86476	0.0035232	0.006452
Trex1	-1.77517	5.0263	2.59731e-05	7.59035e-05
Gm26574	-1.77883	4.91831	9.99635e-05	0.000255498
Zbtb2	-1.78296	4.72835	8.78628e-05	0.000227214
Gm19719	-1.78642	4.04233	0.00147393	0.00291104
Pus3	-1.79264	5.70834	8.39304e-06	2.77012e-05
Tead2	-1.79359	7.72178	2.17414e-10	2.47643e-09
9530052E02Rik	-1.79387	6.09379	4.95415e-07	2.26721e-06
Star	-1.79555	5.9222	4.79597e-06	1.69315e-05
Gm17039	-1.79623	7.08374	8.181e-09	6.01258e-08
H3f3aos	-1.79772	4.31455	0.00133734	0.0026666
Hnrnph1	-1.79848	5.9929	3.64696e-06	1.32659e-05
Prkcz2	-1.81085	6.21199	8.13657e-07	3.50457e-06
4930512B01Rik	-1.8121	6.46839	1.85689e-07	9.54765e-07
Ccdc157	-1.81337	4.17966	0.000310134	0.000708007
Emc4	-1.82508	7.05987	1.63296e-08	1.09867e-07
Pik3r2	-1.82844	8.14118	1.81569e-10	2.11777e-09
St7l	-1.82847	6.98876	1.4224e-08	9.78117e-08
Ccdc66	-1.82872	8.43671	8.96225e-12	1.69275e-10
Otub2	-1.83121	5.01186	6.55212e-05	0.000175522
Anxa9	-1.8327	4.07539	0.000390093	0.000867019
Ifi30	-1.83429	5.67025	1.1588e-06	4.81291e-06
Olfr99	-1.83809	6.34173	3.5279e-07	1.70114e-06
Gm44199	-1.83899	6.04201	2.05585e-06	8.04834e-06
Zfp36	-1.84048	3.93531	0.000506453	0.00109667
Gimap6	-1.84085	4.74656	9.03289e-05	0.000232981
Opa3	-1.84203	3.48076	0.0115026	0.0188719
Fbxl17	-1.84321	4.0963	0.000366939	0.000821561
Gm15943	-1.84491	5.55419	3.21826e-06	1.19148e-05
Ccdc142os	-1.84514	7.17131	2.03515e-09	1.75065e-08
Il16	-1.84732	3.31752	0.00172061	0.00334972
Pde8b	-1.84735	3.92673	0.000382431	0.000852385
Gm37847	-1.84881	4.14284	0.000410948	0.000909283
Pwwp2a	-1.85715	3.25885	0.00200687	0.00385577
Mrpl24	-1.85792	6.26895	1.66332e-07	8.59706e-07
D830025C05Rik	-1.86316	5.33846	2.16919e-05	6.46345e-05
Siglecg	-1.86328	3.65538	0.000695375	0.00146329
Snx2	-1.86702	5.5087	5.41428e-06	1.88783e-05
Smim6	-1.86834	5.11115	9.35255e-05	0.000240442
Cp	-1.8694	6.87693	4.81588e-09	3.7303e-08
Gm53028	-1.87135	3.72308	0.000369081	0.000825422
Mcmbp	-1.87273	3.58673	0.000479214	0.0010457
Gm43980	-1.87324	7.34768	2.11696e-07	1.06902e-06
Zfp865	-1.88622	5.52436	9.0056e-06	2.93554e-05
Iglv3	-1.88658	8.99021	2.57736e-11	4.02802e-10
Ero1b	-1.88718	5.47435	7.6174e-06	2.55247e-05
Ttpal	-1.88754	4.92879	8.91367e-05	0.000230357
Pou2f2	-1.88794	3.79812	0.000430127	0.000946951
4930444A19Rik	-1.89365	8.56025	2.62614e-12	5.93358e-11
Gigyf1	-1.89372	5.55862	3.10232e-06	1.14963e-05
Cept1	-1.9006	6.95126	4.13215e-08	2.49063e-07
Tas1r3	-1.90235	4.42686	0.00045911	0.00100572
Gm37564	-1.90305	4.78066	0.000357704	0.000803159
Gm36279	-1.90377	9.68297	3.08701e-13	9.9236e-12
Arid4b	-1.90597	3.4208	0.000885111	0.00183616
Cap1	-1.90965	7.0849	5.47696e-09	4.14071e-08
Adcy5	-1.91082	3.22051	0.00256525	0.00481624
Gm12319	-1.91288	5.68062	1.76945e-06	7.07423e-06
Smg7	-1.91743	5.04009	5.25848e-05	0.000143429
Med12l	-1.91923	3.92912	0.000532428	0.00114539
Chtop	-1.92705	4.6631	4.28814e-05	0.000119741
H2-Ob	-1.92848	3.68152	0.00187338	0.00361687
Stx5a	-1.93092	3.98231	0.000497337	0.00107989
Gm45355	-1.93196	4.63843	0.000163391	0.000396836
Sipa1	-1.93307	3.91101	0.000141985	0.000349569
Slc23a1	-1.93391	4.59318	4.03755e-05	0.000113304
Cd79a	-1.9346	5.06492	0.000325947	0.000741965
Nsd1	-1.94213	4.18983	0.000249996	0.00058249
Gm43460	-1.94467	5.38703	2.41641e-06	9.23138e-06
Filip1l	-1.94806	3.73216	0.000628348	0.00133503
Senp7	-1.95108	3.90427	0.000409087	0.000905671
Med14	-1.95347	3.50551	0.0015757	0.0030935
Gm48899	-1.95437	6.34424	9.87297e-08	5.39941e-07
Lmo2	-1.96184	4.31159	0.000114094	0.00028826
Fchsd2	-1.96449	5.24344	7.68486e-06	2.5729e-05
Gm33280	-1.97328	4.13938	0.000431277	0.000948953
Gm15819	-1.97676	5.84957	1.97725e-07	1.00618e-06
Gm37362	-1.98081	3.90464	0.000131003	0.000325777
Cmtm7	-1.98172	3.38062	0.000816151	0.00170114
Tubb4a	-1.98211	4.21408	6.98412e-05	0.000185461
Hvcn1	-1.98303	7.91366	4.41503e-11	6.41802e-10
Gm49801	-1.98682	4.16247	0.000421755	0.000930072
Ep300	-1.98767	5.40368	1.35535e-05	4.24649e-05
Atrip	-1.98926	4.84571	6.41578e-05	0.000172337
Gbf1	-1.99058	3.53423	0.00120708	0.00242644
Sys1	-1.99425	3.55791	0.000355657	0.000799925
Gm50019	-1.99442	3.75222	0.0121121	0.0197571
Cfap74	-1.99703	4.9168	1.12012e-05	3.58331e-05
Gm45745	-1.99924	5.17395	5.03181e-06	1.76381e-05
Nr2c2	-1.9997	6.08853	6.03647e-08	3.5152e-07
Brpf3	-1.99988	3.50485	0.000911315	0.00188262
Il17c	-2.00051	3.81641	0.00107098	0.0021772
Insyn2b	-2.00798	4.04133	0.000696044	0.00146385
1700084E18Rik	-2.01971	5.43185	9.93139e-07	4.17867e-06
Gm16229	-2.0277	9.22914	2.38549e-14	1.29209e-12
Ablim1	-2.02856	3.59393	0.000718465	0.00150626
Heatr5a	-2.03252	5.09525	4.29146e-05	0.000119749
Gm15122	-2.0338	5.57982	6.34318e-07	2.80285e-06
Fhod1	-2.03432	5.33477	1.88716e-06	7.46929e-06
Gm43388	-2.03449	7.82776	6.79595e-10	6.61852e-09
N4bp2	-2.03918	3.76035	0.000452309	0.000991369
Ak3	-2.03997	7.58642	5.78406e-11	8.10999e-10
Snapc4	-2.04249	3.29813	0.000748512	0.00156593
Ets1	-2.04307	5.74708	4.13459e-07	1.94621e-06
Gm48008	-2.05229	3.41272	0.000415739	0.000918341
Slc30a7	-2.05435	5.79528	5.6234e-07	2.51526e-06
Uba6	-2.05714	5.25951	5.45766e-05	0.000148722
Gm10832	-2.05798	3.64685	0.000476657	0.0010407
Fbxo24	-2.05983	5.68351	5.06414e-07	2.30421e-06
Hsd11b1	-2.06126	5.62327	7.56089e-06	2.54e-05
Mthfd1	-2.06263	3.95801	7.82087e-05	0.000204283
Ccdc97	-2.06662	4.6278	2.94885e-05	8.55449e-05
Hdgfl3	-2.07144	9.09767	1.47416e-14	8.69977e-13
Gm38384	-2.07248	6.07356	2.67813e-07	1.32445e-06
Stk10	-2.07683	3.15664	0.00046395	0.0010152
Sgpp2	-2.07932	7.47122	1.62524e-10	1.92979e-09
Krtcap3	-2.07974	4.85193	3.2188e-05	9.27634e-05
Pold1	-2.08092	4.22621	0.000101426	0.000258793
Gpr137b-ps	-2.08359	5.96985	4.23362e-08	2.54017e-07
Tmc3	-2.08542	5.65135	4.81295e-06	1.69611e-05
Gm12869	-2.08665	3.61999	0.000249696	0.000582477
Gm26964	-2.09051	6.34726	2.45048e-08	1.56277e-07
Gm13620	-2.0929	6.27273	3.64365e-08	2.21987e-07
Atp2a3	-2.10089	3.84226	0.000350232	0.00078907
Ripor1	-2.1044	4.15674	0.000205971	0.000489724
Zfp740	-2.10488	5.19337	3.58552e-06	1.30665e-05
Tatdn1	-2.10924	4.40351	4.9742e-05	0.000136299
Sptbn5	-2.10955	6.07916	3.81719e-07	1.80973e-06
Ms4a1	-2.11419	3.91839	0.00107922	0.00219058
D830024N08Rik	-2.11721	4.06028	0.000368974	0.000825422
Ubl5	-2.11793	8.71166	9.56474e-14	3.89933e-12
E130215H24Rik	-2.12003	6.96229	1.24067e-09	1.12514e-08
Arhgap27os2	-2.12019	4.31329	0.000461781	0.00101101
Tmem9b	-2.12097	3.19914	0.000366157	0.000820276
Mphosph8	-2.12663	5.76639	1.11155e-06	4.63125e-06
Wdr33	-2.13341	5.15272	1.54291e-06	6.23153e-06
A930015D03Rik	-2.13426	5.95097	1.14002e-07	6.1162e-07
Gnal	-2.13667	8.58182	5.58451e-14	2.59778e-12
Ago2	-2.14733	4.04791	6.51707e-05	0.000174713
Cbx7	-2.14917	7.31737	7.05765e-10	6.82297e-09
Gm14048	-2.14939	4.79779	1.12647e-05	3.6007e-05
Nans	-2.15672	3.96597	0.000519178	0.00111993
Mtfr1	-2.1572	6.29849	1.03745e-07	5.63474e-07
4930599N23Rik	-2.16139	7.77781	1.47741e-10	1.79744e-09
Tm9sf1	-2.16214	3.41087	0.000544361	0.00116788
Clec2i	-2.1654	3.07048	0.0019388	0.00372861
Cmc1	-2.16875	4.64574	3.83737e-05	0.000108456
Nrbp1	-2.17582	4.84703	1.95978e-05	5.91878e-05
Gpr182	-2.1785	5.18433	7.16731e-06	2.42426e-05
Rabgap1	-2.17874	3.22213	0.000267724	0.000619052
Tgif2	-2.18548	6.24276	1.24552e-08	8.77857e-08
Rpe	-2.19534	4.85042	7.08733e-06	2.40131e-05
Ptprc	-2.19679	5.92795	5.48819e-07	2.46035e-06
Gm10916	-2.19705	3.35852	0.000492217	0.00106994
Ighm	-2.20831	4.81658	9.60289e-05	0.000245919
Gm27209	-2.20938	4.68297	4.02486e-05	0.000113028
Pygm	-2.21243	3.22946	0.000219214	0.000518715
Vps37b	-2.2134	7.60828	8.81459e-11	1.16565e-09
Ccdc71l	-2.21497	4.2366	6.22559e-05	0.000167798
Iglc2	-2.22187	4.13192	4.14258e-05	0.000116168
Ap1s2	-2.22469	3.75908	7.11649e-05	0.000188596
Nr2f6	-2.23922	5.49128	8.83271e-06	2.88871e-05
Gm47009	-2.24177	4.77624	4.19547e-06	1.50126e-05
Wdr19	-2.25491	3.23824	0.000224826	0.000529459
Gm27240	-2.26048	3.59476	0.000167219	0.000404641
Tnfrsf10b	-2.26637	3.70925	0.000490069	0.00106645
Tsc2	-2.26734	7.39777	9.24733e-12	1.72491e-10
Rcbtb1	-2.27786	3.65487	0.000247756	0.000578291
Haao	-2.28774	4.54573	1.2361e-05	3.9163e-05
Gm48570	-2.29176	3.17745	0.000290806	0.000668515
Txndc11	-2.31171	7.76473	1.69995e-12	4.30872e-11
Abcd1	-2.3149	6.48123	4.45301e-09	3.48658e-08
Fcamr	-2.31578	7.64805	6.12499e-11	8.52753e-10
Gm16209	-2.31613	3.31613	0.000198493	0.000473366
Cytip	-2.3199	4.01533	3.81372e-05	0.000108019
Stard10	-2.32136	5.65759	1.03447e-07	5.62628e-07
Usp18	-2.33226	4.40469	7.59749e-06	2.54796e-05
Zmym1	-2.3416	5.22235	2.16908e-06	8.41748e-06
1700058P15Rik	-2.35243	6.9671	6.65749e-10	6.51577e-09
Gm37850	-2.3615	4.00869	3.1841e-05	9.19646e-05
Fcgrt	-2.36663	3.07631	0.000124421	0.000311564
Prr33	-2.36704	8.05257	5.42472e-12	1.11715e-10
Cep250	-2.37045	3.91684	6.48108e-05	0.000173973
Cd79b	-2.37578	4.89861	3.42139e-05	9.81726e-05
Gm26716	-2.37665	3.81536	7.43029e-05	0.000195732
Sin3a	-2.37722	4.63923	7.71938e-06	2.58227e-05
Trim13	-2.38501	3.21547	0.000187498	0.000449586
Gm16091	-2.38793	7.39116	1.18789e-10	1.50543e-09
Irak3	-2.39095	4.40237	1.16823e-05	3.72215e-05
Olfr173	-2.39648	3.18552	0.000148661	0.000365551
Arhgap27os1	-2.39694	5.78265	9.58273e-08	5.26251e-07
Gm15650	-2.3977	5.47545	4.85916e-07	2.23668e-06
Hes5	-2.4002	4.33703	8.53953e-06	2.81143e-05
Cd37	-2.40231	4.02542	2.27923e-05	6.76074e-05
Stk17b	-2.41509	4.12806	0.000206601	0.000490925
Poc1b	-2.42387	5.72372	4.57843e-08	2.73461e-07
Gm14252	-2.42627	5.50348	2.14323e-07	1.08091e-06
Cdc42bpa	-2.42932	3.85949	0.000119609	0.000300276
Apobec2	-2.43989	3.80075	0.00303088	0.00560095
Cul5	-2.44027	5.07547	7.15371e-07	3.12896e-06
Ppp6r2	-2.44485	4.74047	1.87799e-06	7.44792e-06
P2rx4	-2.45125	5.3596	2.80191e-07	1.37967e-06
Utp20	-2.45196	2.98598	0.000399867	0.000887246
Zeb2os	-2.45306	3.63063	8.61204e-05	0.000223438
Nomo1	-2.45329	5.58315	3.71157e-07	1.76814e-06
Cd27	-2.45363	5.49277	8.91075e-07	3.80898e-06
Klf13	-2.46227	3.86144	3.56798e-05	0.000102008
Esyt1	-2.46318	3.70925	7.95784e-05	0.000207418
Smad2	-2.46334	3.12743	7.28109e-05	0.000192571
Gm41077	-2.46558	4.25941	1.64855e-05	5.06871e-05
Gm46440	-2.46929	3.43702	3.47861e-05	9.95975e-05
Sting1	-2.47204	3.8881	1.54673e-05	4.78916e-05
Slc49a4	-2.4743	3.56673	7.79941e-05	0.000203961
Gm18030	-2.48424	4.15666	6.99883e-05	0.000185727
Sdccag8	-2.48442	6.82244	1.22903e-10	1.53784e-09
Gm20519	-2.49622	3.90631	3.61936e-05	0.000103179
4833422C13Rik	-2.50147	3.34531	0.000657607	0.00139047
4930426D05Rik	-2.50835	7.1206	2.8956e-09	2.37043e-08
Pcolce	-2.51351	4.69992	1.08441e-05	3.48033e-05
BC035044	-2.5172	3.8601	3.73339e-05	0.00010613
Prkcd	-2.52056	6.20615	2.51845e-09	2.09932e-08
Golgb1	-2.52172	3.90213	2.5778e-05	7.53893e-05
Ebf1	-2.52403	3.3525	0.000808042	0.00168513
Scarf1	-2.52936	3.59215	0.000139005	0.000343517
Gm20481	-2.53329	3.84178	0.0080951	0.0137256
Zfhx2os	-2.5389	4.39069	3.44115e-06	1.26335e-05
Btbd6	-2.54073	4.65913	2.87845e-06	1.0788e-05
Mast4	-2.54832	6.88163	2.56309e-10	2.8415e-09
B3gnt5	-2.56489	3.37617	6.78524e-05	0.000180909
Gramd4	-2.57119	5.5076	1.77266e-07	9.13831e-07
Trim8	-2.57232	5.48042	1.99206e-07	1.01181e-06
Mga	-2.57294	3.23803	0.000886491	0.00183806
Tut7	-2.57507	3.15381	0.00028913	0.000665049
Btg1	-2.5754	4.75434	2.18338e-05	6.50082e-05
Gm26801	-2.57741	5.25831	1.2615e-06	5.17963e-06
Naa60	-2.57894	3.04621	0.000333199	0.000754997
Chd2	-2.58999	3.50578	3.00774e-05	8.71253e-05
Gm47861	-2.59288	2.77839	3.21338e-05	9.26747e-05
Tubb6	-2.61037	4.69809	8.25488e-07	3.55166e-06
Aen	-2.62077	3.70036	3.19653e-05	9.2256e-05
C430042M11Rik	-2.63001	4.6746	3.53593e-06	1.28977e-05
4930562F07Rik	-2.63274	9.77229	1.631e-16	2.48037e-14
Scx	-2.63995	3.69224	0.000332509	0.000754036
Gm5711	-2.64603	3.46735	4.61221e-05	0.000127529
Sec22c	-2.64975	4.88475	5.54113e-07	2.48127e-06
Prr29	-2.67014	3.20947	2.44159e-05	7.19823e-05
Susd6	-2.67156	3.03413	2.54805e-05	7.47404e-05
Gm43962	-2.67198	3.17693	0.000276458	0.000637758
Slc7a7	-2.69438	5.26631	1.69689e-07	8.75914e-07
Hopxos	-2.70108	6.62321	3.36041e-09	2.72835e-08
H60b	-2.70141	4.26461	4.21357e-05	0.000117908
Btla	-2.70198	3.88838	0.000200161	0.000477057
Gvin3	-2.70842	3.32893	6.75616e-05	0.000180266
Tut4	-2.71123	4.25081	3.83011e-05	0.000108328
Gm20033	-2.71539	4.41098	1.91106e-06	7.54123e-06
Avpr2	-2.72364	9.90915	4.37469e-15	3.32645e-13
Ciz1	-2.72397	3.61086	2.62154e-05	7.64988e-05
Gm12802	-2.72867	5.82969	2.62203e-08	1.65615e-07
Gm29264	-2.74113	2.98522	9.20249e-05	0.000236892
Pde3b	-2.74337	5.10961	1.3589e-06	5.55645e-06
Serpinc1	-2.7501	7.8084	5.96872e-13	1.72265e-11
Dgka	-2.75055	3.09416	0.000140849	0.000347204
Gm14834	-2.75691	3.78382	2.04633e-05	6.139e-05
Hhex	-2.75861	3.26347	3.43004e-05	9.83494e-05
Heatr1	-2.7597	3.12397	0.000129936	0.000323531
Klhl24	-2.7618	3.09114	0.000206919	0.000491387
Cerkl	-2.76432	7.33459	2.86658e-12	6.38947e-11
Sirt2	-2.76533	6.38834	9.16988e-10	8.65339e-09
Rarb	-2.7671	3.36418	1.88472e-05	5.71485e-05
Ccnb2-ps	-2.76882	5.88608	7.40283e-08	4.21803e-07
Tapbpl	-2.76972	5.71186	6.24389e-08	3.61469e-07
Cass4	-2.77335	4.33011	9.72711e-07	4.11348e-06
Gm45001	-2.77399	3.3007	2.43134e-05	7.17427e-05
Kcnrg	-2.77797	3.26565	1.33127e-05	4.1843e-05
Arhgap25	-2.77908	2.8322	5.53936e-05	0.000150533
Trim12a	-2.78087	2.84636	1.67856e-05	5.15699e-05
Orc1	-2.78175	2.99356	9.16226e-05	0.000236164
Klf2	-2.7904	3.27401	1.60109e-05	4.942e-05
Chil5	-2.80103	4.89819	1.49762e-06	6.05481e-06
Gm17112	-2.80122	5.37918	4.16371e-07	1.95759e-06
Syk	-2.80295	4.26202	3.24249e-06	1.19821e-05
Gm15976	-2.82044	3.22245	0.000249943	0.00058249
Trim5	-2.82708	3.12938	0.00015252	0.000373415
Aff4	-2.82994	3.01824	8.96263e-05	0.000231469
Ccar2	-2.83053	5.79953	1.68707e-08	1.12491e-07
Ankrd11	-2.83156	6.91776	2.79493e-11	4.31686e-10
Rps11	-2.83654	9.03467	4.98162e-14	2.38385e-12
6030442K20Rik	-2.84986	3.56504	6.73661e-06	2.30022e-05
9430025C20Rik	-2.84992	3.68547	9.38479e-06	3.04909e-05
Dusp28	-2.85155	3.00296	8.52608e-05	0.000221499
Glra4	-2.85976	2.88599	7.59319e-05	0.000199359
Pigv	-2.86216	5.70012	4.87475e-09	3.7646e-08
Lrba	-2.86818	3.72174	1.26372e-05	3.98466e-05
9930014A18Rik	-2.86906	7.4596	9.6985e-13	2.66305e-11
Gm15872	-2.87391	4.72173	1.97683e-06	7.77648e-06
Gm17530	-2.87658	2.6275	3.99706e-05	0.000112327
Ddx39a	-2.88074	10.9581	6.03334e-20	4.94028e-17
Epc1	-2.88301	4.29066	4.10443e-06	1.47402e-05
Dmxl1	-2.8882	3.45176	9.99439e-05	0.000255498
Gm22573	-2.90331	2.64138	4.68017e-05	0.000129228
Gm28402	-2.91217	3.6169	0.000148869	0.000365836
Gm47862	-2.91389	3.58479	4.8257e-06	1.69909e-05
Snord35b	-2.9164	5.69309	3.98089e-08	2.41048e-07
Gm6610	-2.92662	3.43886	8.46512e-06	2.79158e-05
1700048M11Rik	-2.93021	3.73188	5.65402e-06	1.9645e-05
Myo5a	-2.93113	4.88533	3.0667e-07	1.497e-06
Clec2g	-2.93422	4.86352	1.34621e-06	5.51026e-06
Ifi27	-2.93855	5.23235	1.49478e-07	7.7973e-07
Gm15408	-2.94247	6.61461	1.07482e-09	1.00232e-08
Cpne5	-2.94465	3.43153	7.47504e-06	2.51543e-05
Irf2bpl	-2.95122	5.0439	5.86621e-06	2.02223e-05
Gpx3	-2.95236	3.44397	0.000118499	0.000298058
Ccdc125	-2.95324	3.88524	8.3101e-06	2.74733e-05
Angptl1	-2.95512	4.80329	1.10595e-05	3.5437e-05
Sfi1	-2.95522	7.6155	1.10578e-12	2.93439e-11
Gm16214	-2.96893	8.8198	1.1548e-15	1.23407e-13
Gm48682	-2.97225	3.88013	2.46761e-05	7.26502e-05
Add3	-2.99198	4.07662	1.23987e-05	3.92509e-05
Gm44148	-2.99387	4.25143	2.14521e-05	6.3968e-05
2310044K18Rik	-3.00429	2.93097	6.79663e-05	0.000181091
Lgals1	-3.02236	3.7958	3.01529e-05	8.72801e-05
5430431A17Rik	-3.02529	3.65121	3.0074e-06	1.1197e-05
Wrap73	-3.02766	3.94629	2.70731e-06	1.02144e-05
Cfap45	-3.02848	3.94258	8.0471e-06	2.67605e-05
Gm20421	-3.04906	5.31763	1.47311e-07	7.69441e-07
Rpl13-ps5	-3.05949	2.72541	1.17914e-05	3.75389e-05
Sgsm2	-3.06698	4.28547	2.63174e-06	9.96735e-06
Gm43461	-3.0779	4.02782	8.35661e-05	0.000217382
Bbs4	-3.08249	3.52206	2.8216e-06	1.06051e-05
Notch2	-3.08789	3.39866	1.00219e-05	3.23746e-05
Gm47248	-3.10133	8.78229	3.37225e-15	2.837e-13
Lyn	-3.10532	4.06948	1.80158e-06	7.17366e-06
4921511I17Rik	-3.10634	3.71008	4.38221e-06	1.55961e-05
Bach2os	-3.12832	8.47298	1.25475e-14	7.87506e-13
Otud1	-3.12932	4.02272	8.64799e-05	0.000224077
Palm3	-3.13354	4.68851	8.69925e-08	4.85146e-07
Gm42870	-3.13401	6.17136	5.11984e-09	3.91564e-08
Gm47177	-3.1358	3.44169	2.0385e-06	7.98833e-06
Ltk	-3.13845	3.05544	3.76925e-05	0.000106913
Rbpjl	-3.14744	3.06046	1.96997e-05	5.94145e-05
1700008B11Rik	-3.15082	4.92951	2.98682e-08	1.8569e-07
Naa25	-3.16444	4.09094	7.4212e-06	2.49944e-05
Tnip2	-3.18069	2.56304	6.02694e-06	2.07222e-05
Gm15991	-3.18878	3.54616	1.77625e-06	7.09422e-06
Gvin-ps7	-3.21435	3.46845	1.0904e-05	3.4967e-05
Ampd3	-3.2191	4.66121	1.06853e-07	5.77973e-07
Mrpl38	-3.22244	3.22492	3.61599e-05	0.000103158
Gm9530	-3.22655	2.56501	3.89896e-05	0.000109961
Prrt3	-3.26077	3.78272	2.84486e-05	8.27103e-05
B3gnt8	-3.26431	3.05521	5.85604e-06	2.02049e-05
Mgat5	-3.26686	3.37023	9.20545e-06	2.99822e-05
Marchf1	-3.26963	3.50275	8.74665e-06	2.86768e-05
Edaradd	-3.27086	3.34475	1.16047e-06	4.81479e-06
Usf3	-3.27259	2.86239	7.16597e-06	2.42426e-05
Mst1	-3.27974	5.54968	1.84829e-08	1.22006e-07
Gm16174	-3.28249	3.76623	2.30401e-05	6.82913e-05
Psd3	-3.29579	2.84011	6.60531e-06	2.26321e-05
Rnf216	-3.2985	4.85843	3.63984e-08	2.21987e-07
Kif9	-3.30336	2.59267	2.47728e-06	9.40937e-06
Gm43413	-3.30336	3.41302	3.23502e-06	1.19657e-05
Cr2	-3.30646	3.90466	9.31152e-06	3.02778e-05
Slc16a6	-3.33058	6.22791	1.06562e-10	1.38146e-09
Gm37844	-3.33531	8.17297	2.06249e-13	6.97015e-12
Retreg1	-3.34845	2.60895	3.89123e-06	1.40768e-05
Arhgef3	-3.38356	2.89101	1.37649e-05	4.29569e-05
Gm10584	-3.38612	6.10249	8.85358e-10	8.39498e-09
Rln3	-3.41558	3.31138	5.74186e-06	1.98803e-05
Gm15342	-3.43285	6.63691	8.7662e-12	1.67447e-10
Gm15336	-3.45231	5.7015	3.55814e-09	2.86535e-08
4930439D14Rik	-3.45386	5.67697	1.39506e-08	9.65809e-08
1700093J21Rik	-3.45553	3.09214	1.03779e-05	3.34699e-05
Polr2e	-3.47476	3.11945	4.93939e-06	1.73494e-05
Gm16083	-3.49566	8.68019	1.62639e-15	1.56848e-13
Gm26789	-3.49863	5.51778	4.89346e-09	3.77169e-08
Gm45548	-3.52245	3.48692	2.59532e-07	1.28918e-06
Brca2	-3.52708	4.32706	7.04029e-07	3.08294e-06
Gm8250	-3.55711	3.14053	3.69118e-06	1.34144e-05
Gm15154	-3.56535	3.53643	8.92408e-07	3.81056e-06
Gm17552	-3.56818	9.14719	1.50891e-15	1.49156e-13
Mybbp1a	-3.59926	4.49103	3.58067e-07	1.72238e-06
Trim12c	-3.60158	4.30957	2.53546e-07	1.26262e-06
Cd55	-3.60847	3.88908	7.50287e-07	3.25646e-06
Icosl	-3.61336	2.62487	3.88974e-06	1.40768e-05
Vim	-3.62199	4.42177	5.71268e-07	2.54877e-06
Sbk1	-3.63701	3.01744	7.17973e-07	3.13341e-06
B430319F04Rik	-3.64686	3.80197	3.86752e-07	1.8314e-06
Oprm1	-3.64929	2.73687	1.37424e-06	5.60758e-06
Gm36956	-3.65657	3.69754	9.65139e-06	3.128e-05
Fam114a1	-3.68286	2.50142	2.40982e-06	9.2151e-06
Tbc1d2	-3.69097	2.77647	7.54243e-07	3.27004e-06
Atxn2	-3.70703	3.4504	5.46236e-06	1.90125e-05
Nfkbiz	-3.71213	2.52567	2.16637e-06	8.41748e-06
Gm50130	-3.71381	3.41673	4.86905e-06	1.71283e-05
Gm15337	-3.73427	6.35247	3.57061e-11	5.36813e-10
Gm34006	-3.74159	2.79264	5.20266e-06	1.82047e-05
Vmn2r84	-3.74535	4.6194	6.26707e-08	3.62281e-07
Slc35g2	-3.74663	3.36292	1.22536e-06	5.05223e-06
Macf1	-3.75052	4.50061	4.33415e-07	2.02568e-06
Slfn5os	-3.78991	6.20218	3.48356e-10	3.70269e-09
Ap1g1	-3.81227	4.14476	1.35688e-07	7.14393e-07
Rftn2	-3.81285	2.82548	4.56703e-07	2.12091e-06
Nxpe1-ps	-3.82778	5.63772	2.18506e-10	2.47643e-09
Gm43668	-3.83111	2.6101	1.37279e-06	5.60744e-06
Gm38244	-3.86628	2.61344	9.68127e-07	4.09847e-06
Gm19261	-3.87673	5.49246	2.57206e-09	2.13206e-08
Gm47243	-3.92158	2.88	3.19881e-07	1.55382e-06
C230038L03Rik	-3.92574	2.38097	2.21454e-07	1.11262e-06
Kdm7a	-3.92687	2.60876	3.08965e-06	1.14601e-05
Gm43990	-3.93597	2.6388	5.75218e-07	2.56127e-06
Gm43769	-3.96362	2.95496	2.92711e-07	1.43596e-06
4930523C07Rik	-3.97245	2.65146	3.68142e-07	1.76014e-06
Mapk12	-4.0382	4.40677	1.36447e-08	9.5103e-08
Gm26581	-4.04727	4.23485	1.54889e-08	1.05229e-07
Gm15356	-4.09385	2.48426	1.84803e-07	9.51448e-07
Gm9937	-4.11321	3.00805	7.33367e-08	4.19037e-07
Dennd1c	-4.12015	2.90119	8.57399e-06	2.82043e-05
Cd302	-4.12917	2.8758	9.62681e-07	4.07979e-06
Gm41555	-4.13551	7.13432	9.46819e-14	3.89933e-12
Usp36	-4.15442	3.67349	2.00875e-07	1.01828e-06
Wwp1	-4.16656	2.5306	1.18939e-07	6.34665e-07
Samd9l	-4.17507	3.42162	4.57009e-07	2.12091e-06
2310015A10Rik	-4.20249	3.56773	2.21283e-07	1.11262e-06
Nacad	-4.21884	6.68016	5.51543e-12	1.12995e-10
Gm29811	-4.25119	2.76624	2.79368e-07	1.37733e-06
Gm28289	-4.26588	6.13375	1.09371e-09	1.01753e-08
Gm43963	-4.29865	6.82174	9.44937e-13	2.63118e-11
Fcrl1	-4.30048	2.54561	1.30879e-07	6.90917e-07
Gm20612	-4.31717	3.62108	1.3779e-08	9.55828e-08
Ralgps2	-4.31947	3.61423	1.13365e-08	8.09109e-08
Pigr	-4.34677	2.07192	2.28073e-08	1.46634e-07
1700071M16Rik	-4.35906	2.0801	1.63961e-08	1.10068e-07
Gm12490	-4.38502	2.066	1.68598e-08	1.12491e-07
Gm10561	-4.40321	3.13489	2.35676e-08	1.50787e-07
Chad	-4.44309	5.41568	3.93024e-09	3.12862e-08
Gm29417	-4.45309	3.9469	6.61079e-08	3.81036e-07
Olfr164	-4.465	3.85329	7.40342e-08	4.21803e-07
Gm13561	-4.46647	3.57209	5.25036e-08	3.08469e-07
Gm33489	-4.49819	2.1375	1.36617e-08	9.5103e-08
Klhl14	-4.50058	5.50015	6.5187e-11	8.91867e-10
Kctd12	-4.50488	2.92775	4.1175e-08	2.48558e-07
Gm10645	-4.5311	3.17234	5.53193e-08	3.23569e-07
Pcnx2	-4.53457	2.70403	1.67219e-08	1.11875e-07
Ptpdc1	-4.54586	2.69606	4.6541e-08	2.77143e-07
Tmem120b	-4.54677	4.23687	1.04481e-07	5.66692e-07
Cd38	-4.55672	5.53963	3.59585e-10	3.80161e-09
Tmcc2	-4.57265	3.10677	7.1011e-08	4.07515e-07
Pdcd11	-4.57821	7.17191	1.17927e-13	4.66285e-12
Cc2d2b	-4.59962	4.73152	2.10908e-08	1.37159e-07
Il24	-4.60908	3.24091	9.3972e-09	6.78039e-08
Fam149b	-4.61551	8.56622	3.62763e-16	4.78122e-14
Gm44401	-4.6578	2.25378	9.3597e-09	6.76567e-08
Zfp318	-4.67058	2.74229	1.29562e-08	9.09927e-08
Gm14965	-4.71609	4.73421	8.99279e-08	4.98703e-07
Gm26560	-4.73049	2.26365	8.30271e-09	6.09071e-08
Gm22720	-4.79097	2.31785	5.20228e-09	3.96452e-08
Cd55os	-4.79586	8.78859	1.35933e-15	1.39746e-13
Gm16170	-4.83996	8.62678	3.72318e-17	6.69157e-15
4632428C04Rik	-4.87679	4.68484	9.35301e-10	8.80519e-09
Ms4a6c	-4.92878	7.96565	9.72422e-15	6.30321e-13
Brwd1	-4.94043	3.65121	9.63098e-09	6.91123e-08
Gm45472	-4.96584	4.04266	1.55657e-08	1.05569e-07
Pex11g	-5.01604	4.4004	5.11748e-08	3.01761e-07
Prkce	-5.03146	3.70374	2.41671e-09	2.0245e-08
Nxpe4	-5.09518	6.3238	2.72784e-11	4.22975e-10
Kcng1	-5.11168	5.15488	2.1917e-09	1.85567e-08
Gm16015	-5.11389	4.85477	1.50415e-09	1.34862e-08
Rapgef4os2	-5.13481	5.18842	1.64893e-09	1.46185e-08
Igkv4-81	-5.15767	2.44991	1.19615e-09	1.09228e-08
Gm28720	-5.16449	2.48293	5.48426e-10	5.56266e-09
Gm16274	-5.17529	2.4621	6.25677e-10	6.23156e-09
Fundc1	-5.18508	2.50213	1.03202e-09	9.64678e-09
Gm3443	-5.28086	2.54751	6.29089e-10	6.24979e-09
Olfr98	-5.4537	3.14372	6.76218e-10	6.60189e-09
Gm15354	-5.4551	5.37685	6.52065e-10	6.39768e-09
Kbtbd11	-5.46656	3.15723	6.42905e-10	6.33927e-09
Ccne1	-5.47445	3.94293	2.04239e-09	1.75176e-08
Rapgef4os3	-5.50883	3.95463	1.80625e-09	1.58357e-08
Gm15908	-5.52916	3.95823	5.48669e-10	5.56266e-09
Gm43198	-5.57034	6.60774	1.30793e-12	3.4237e-11
Gm13594	-5.57436	3.19734	3.28229e-10	3.51712e-09
Lrrk2	-5.59862	2.683	8.24721e-11	1.10541e-09
Sorl1	-5.64466	3.47594	1.20719e-09	1.09983e-08
Sell	-5.76715	2.75265	1.09018e-10	1.39954e-09
Chrnb1	-5.80336	3.31706	6.01439e-10	6.03174e-09
Gm20234	-5.86505	2.82174	2.55961e-11	4.01615e-10
Vmn2r97	-5.87579	4.6916	5.32304e-08	3.12275e-07
Hipk2	-5.91686	2.84153	5.66372e-11	7.96952e-10
Aim2	-6.14209	2.95382	1.23888e-11	2.18684e-10
Gm45694	-6.29982	3.83332	2.73294e-10	3.01004e-09
Sele	-6.33914	3.06764	6.67518e-12	1.33301e-10
Slc4a3	-6.41061	3.10248	1.41399e-11	2.40988e-10
Ighd	-6.47841	3.11579	6.8589e-11	9.35176e-10
6530413G14Rik	-7.01691	7.2939	2.43724e-13	8.03071e-12
Bckdha	-7.18077	3.48342	1.38907e-11	2.388e-10

## Sheet: Supplementary File 1b
Supplementary File 1b. Differentially expressed genes between naïve and day 4 VC B cells.
Gene	logFC (VC/naive)	AveExpr	P.Value	adj.P.Val
Gm16557	11.5605	5.22408	1.60382e-16	3.26005e-14
Gm29233	9.62299	4.24799	1.39618e-13	7.35025e-12
Basp1	9.03345	6.73048	2.02778e-14	1.53337e-12
Gm42538	8.90802	3.898	3.08244e-15	3.37365e-13
Gm15347	8.21637	4.32257	1.10134e-12	3.6353e-11
Htr7	8.19056	3.54491	1.09359e-13	6.06433e-12
Tmem176b	8.13661	4.03976	6.03894e-14	3.69352e-12
BC037039	8.12211	5.82385	1.71686e-14	1.37316e-12
9330151L19Rik	8.0941	5.07555	1.04256e-12	3.55412e-11
Gm15350	8.05543	5.23462	6.67932e-12	1.61507e-10
Apol7d	7.71681	3.81665	7.8522e-11	1.20507e-09
Gm2788	7.60867	5.72288	6.51287e-13	2.50468e-11
A930001C03Rik	7.57148	3.2315	1.49768e-13	7.68996e-12
Gm13070	7.47404	3.95665	6.58992e-13	2.50468e-11
Gm5340	7.29308	3.09202	1.81651e-13	8.78471e-12
LTO1	7.20993	4.10191	1.87225e-11	3.8548e-10
Ighe	7.20343	3.59606	5.18336e-10	6.00402e-09
Ighg1	7.18188	4.74661	3.12981e-12	8.39799e-11
Grm6	7.09397	3.51676	6.23436e-11	9.97258e-10
Gm45667	7.047	2.96179	9.93576e-13	3.41511e-11
Rnf165	7.02089	2.96054	1.24703e-12	4.02045e-11
Gm44985	6.98489	6.20089	2.68269e-13	1.2397e-11
Pdzd11	6.9647	5.24426	2.83851e-11	5.3418e-10
Gm16556	6.94954	2.9133	1.48356e-12	4.67435e-11
Gm37905	6.93659	4.46386	2.36719e-12	6.8847e-11
Gm15512	6.8998	2.88193	4.40226e-12	1.15151e-10
Gm16567	6.89261	2.8779	3.78448e-11	6.69772e-10
Exosc9	6.87654	6.7772	3.86431e-13	1.70112e-11
Ighg2b	6.85463	3.92874	8.99982e-13	3.17205e-11
Gm29100	6.76596	2.80328	9.65283e-11	1.42869e-09
E130310I04Rik	6.74927	2.80958	2.48073e-12	6.98517e-11
Ccl22	6.68655	2.80573	2.3043e-11	4.58545e-10
Cish	6.61538	2.73612	1.30339e-11	2.91441e-10
Gm41724	6.5932	2.7113	5.26433e-10	6.04816e-09
Gm14024	6.54163	4.70631	1.29135e-12	4.12488e-11
Gm45774	6.5367	2.71688	3.81446e-12	1.00407e-10
Trim46	6.48594	3.46169	1.52953e-10	2.14185e-09
Gm48840	6.28201	7.70468	2.28876e-13	1.0817e-11
Gm38391	6.28099	2.57898	8.21327e-11	1.23764e-09
Lcorl	6.20278	7.03748	4.13964e-14	2.82242e-12
Pmch	6.2022	4.24245	1.99854e-09	1.84709e-08
Wdr54	6.20015	2.53618	3.22245e-11	5.85247e-10
Gm42456	6.1117	2.50614	1.52028e-11	3.24248e-10
Gm49544	6.10151	7.22534	1.3805e-13	7.35025e-12
Gm43621	6.09803	2.488	1.27898e-11	2.87529e-10
Gm20556	6.09643	2.49755	1.45251e-11	3.13259e-10
Hdac11	6.04371	2.47325	1.66178e-11	3.47303e-10
Gm44570	6.03071	2.46148	1.35463e-11	2.99676e-10
Gm15851	6.03009	2.44516	1.3044e-10	1.86613e-09
Gm48488	5.9797	2.41738	8.1988e-11	1.23764e-09
Nemf	5.95537	8.95987	1.77332e-19	3.05573e-16
Gm10389	5.89596	2.38236	7.05416e-11	1.09991e-09
Ccdc85b	5.88204	3.3188	3.46712e-09	3.02301e-08
4930469K13Rik	5.8509	2.34273	7.32764e-10	8.06822e-09
Gm16617	5.83711	2.34897	8.26889e-11	1.24153e-09
Gm15401	5.79456	2.34976	5.24952e-11	8.76818e-10
A230056P14Rik	5.75291	2.31961	5.45482e-11	9.03848e-10
4933431E20Rik	5.73926	2.31081	1.72198e-10	2.37143e-09
Tmc8	5.73379	5.52879	2.29848e-11	4.58545e-10
Pelo	5.72671	2.31744	7.06049e-11	1.09991e-09
Gm17041	5.7106	6.15676	9.62374e-12	2.2559e-10
Rccd1	5.69167	6.59421	4.36404e-14	2.83595e-12
4930592A05Rik	5.68635	2.28219	6.42865e-11	1.02049e-09
Cdc23	5.67021	8.08688	2.53935e-17	7.04077e-15
Gatb	5.63131	2.26985	1.02346e-10	1.50077e-09
Gm13192	5.62635	2.25088	1.15344e-10	1.67149e-09
Gm11149	5.62223	2.23181	7.21864e-10	7.98466e-09
Lmo7	5.58594	2.24283	4.1444e-10	4.93885e-09
Rp1l1	5.58308	2.76449	3.1638e-09	2.79368e-08
Gm38124	5.56289	2.20734	7.82131e-10	8.49316e-09
Gm28513	5.55706	2.21037	4.20084e-10	4.9918e-09
Prss23os	5.55175	5.82148	1.46914e-10	2.06424e-09
E230034D01Rik	5.54891	2.20999	1.65062e-10	2.30366e-09
Gm13872	5.54168	2.22777	2.05416e-10	2.73823e-09
Amdhd1	5.54165	2.21632	1.02277e-10	1.50077e-09
Gm12743	5.53759	5.20974	2.65405e-11	5.06339e-10
Gm9136	5.53145	2.20394	1.37206e-10	1.94757e-09
Tmem176a	5.53019	2.21757	2.91399e-10	3.62853e-09
Gm14549	5.49864	3.78231	4.8995e-10	5.72388e-09
Lef1os1	5.49238	5.73272	3.09817e-11	5.67659e-10
Gm37975	5.48637	2.18659	1.35036e-10	1.92333e-09
Gm15419	5.48586	2.16598	8.20119e-10	8.81363e-09
Gpr15	5.48109	3.89701	3.31365e-10	4.05337e-09
Syt12	5.45298	2.19137	1.04856e-09	1.07413e-08
Ccdc24	5.43612	2.6989	2.39909e-10	3.09871e-09
Gm38037	5.4076	6.13198	2.95002e-12	8.07181e-11
4933428G20Rik	5.39732	3.43865	2.50509e-10	3.19728e-09
6530437J22Rik	5.35023	2.10839	8.15623e-10	8.81085e-09
Mtrex	5.33194	5.33633	2.54058e-11	4.96068e-10
Gm36099	5.23968	2.06248	5.01232e-10	5.82298e-09
Chpf2	5.17711	2.58048	6.42285e-09	5.11736e-08
Sap18	5.17619	3.85884	3.85566e-10	4.63459e-09
Ighg3	5.145	2.00267	1.32164e-09	1.29639e-08
Gm16838	5.13774	2.02241	8.19623e-10	8.81363e-09
Ippk	5.11609	4.45263	3.98905e-10	4.78111e-09
Gm36569	5.09733	2.48814	4.45034e-08	2.93793e-07
Mxra8os	5.08782	1.98201	1.37691e-09	1.34112e-08
Elovl1	5.08617	4.60223	9.27224e-10	9.71366e-09
Numb	5.07327	4.51196	1.66395e-10	2.3068e-09
Gm9922	5.06909	1.98385	1.08162e-09	1.09987e-08
E2f8	5.06751	1.9854	1.12635e-09	1.14256e-08
Gm10521	5.03728	3.25118	4.62132e-08	3.01255e-07
Acsl1	5.01691	2.47271	1.78244e-09	1.67719e-08
Gm11832	5.01482	2.7007	2.77419e-08	1.92298e-07
Gm15879	4.99551	1.93792	1.48752e-09	1.43874e-08
Gm15063	4.99508	3.93742	2.15462e-10	2.81795e-09
Chst11	4.98899	2.47543	3.444e-09	3.00916e-08
Klhdc1	4.9837	2.46087	9.1979e-09	7.071e-08
Gm45507	4.98339	9.20097	3.45117e-17	8.44319e-15
Stab1	4.98269	3.52041	6.53748e-08	4.04003e-07
2410017I17Rik	4.97297	2.45765	1.81962e-09	1.70063e-08
Ints8	4.95993	4.66887	2.83637e-10	3.55581e-09
Chid1	4.92927	3.6008	1.22163e-08	9.20431e-08
Spsb2	4.87074	4.3869	1.66013e-09	1.58724e-08
Top2a	4.80931	2.9224	2.14021e-08	1.53203e-07
Gm12744	4.77675	8.75362	3.02448e-18	1.39765e-15
Dhcr24	4.76574	2.34712	5.19435e-09	4.26943e-08
Gm45437	4.74976	2.34383	6.56399e-09	5.21982e-08
1700023B13Rik	4.74676	5.20529	1.91524e-10	2.59166e-09
Ubxn6	4.73534	8.24248	9.10034e-16	1.26161e-13
Cbx3-ps8	4.69381	2.31277	8.30402e-09	6.41941e-08
Lrrc41	4.66593	6.74288	4.11499e-13	1.78273e-11
4933421O10Rik	4.6642	2.31632	1.43935e-08	1.07281e-07
Gm49227	4.6495	4.0695	2.79285e-08	1.93269e-07
Gm26592	4.57269	2.26806	6.87741e-08	4.22498e-07
4932702P03Rik	4.53527	2.93635	4.29513e-07	2.08685e-06
A030001D20Rik	4.49597	3.7694	9.78281e-10	1.01717e-08
Klhdc2	4.49205	4.84544	2.14842e-09	1.97247e-08
Gm3550	4.47071	2.44928	6.72539e-08	4.14384e-07
Metap2	4.46769	4.91205	1.80058e-09	1.69043e-08
Gm13994	4.46606	2.19961	2.81403e-08	1.94411e-07
Rps18-ps4	4.46382	4.63407	1.94017e-08	1.40578e-07
Gm47863	4.43002	4.5035	1.68611e-09	1.6047e-08
Mtbp	4.42885	2.18489	2.06376e-08	1.48241e-07
Gm10461	4.40393	3.71416	2.38037e-09	2.17104e-08
1110046J04Rik	4.35252	3.67598	2.8801e-08	1.97989e-07
Gm20478	4.32759	2.37751	1.46631e-07	8.15273e-07
Mterf4	4.26816	3.55197	3.41451e-08	2.31903e-07
Lrrc59	4.25487	5.50952	1.19452e-10	1.71904e-09
Mfn1	4.2522	3.40331	3.76743e-07	1.86532e-06
Gm28535	4.24795	5.10144	5.29533e-10	6.05431e-09
Ccnyl1	4.24216	3.41512	7.36754e-08	4.48632e-07
G430095P16Rik	4.22841	2.61901	1.1739e-07	6.68425e-07
A230020J21Rik	4.20637	8.77177	8.83238e-17	2.04077e-14
Lctl	4.19253	6.59062	5.00642e-13	2.06155e-11
Gm44238	4.18799	7.27121	4.94037e-12	1.26055e-10
Pomgnt1	4.18349	7.43889	1.62127e-14	1.34097e-12
Gm26588	4.16729	3.36461	2.66061e-08	1.85662e-07
Gm2027	4.15461	2.68224	1.34999e-06	5.78824e-06
Garre1	4.15149	3.62831	7.74547e-08	4.67539e-07
Ung	4.14927	3.38847	8.80802e-08	5.24822e-07
Gm29331	4.13285	3.98863	2.83516e-09	2.54125e-08
Gm37422	4.1288	7.38306	3.20035e-14	2.25598e-12
Gm12660	4.11971	6.63752	3.05306e-12	8.29912e-11
Gm47513	4.01233	5.98694	2.09845e-10	2.77062e-09
Gm37759	4.00856	7.36847	2.09003e-14	1.55222e-12
Gm15518	4.00624	5.61184	2.87214e-10	3.58715e-09
B230206H07Rik	4.00196	3.78686	5.92742e-08	3.72389e-07
Pkm	3.996	5.45289	9.75432e-08	5.75436e-07
Rrm2	3.96793	2.97779	1.58575e-07	8.7122e-07
5031425E22Rik	3.96614	6.44196	9.39038e-12	2.21901e-10
Fam227b	3.94546	5.81631	5.05936e-11	8.55361e-10
Gm13571	3.91466	8.60978	1.51812e-17	4.50991e-15
Gm17040	3.91214	5.02724	7.44706e-09	5.80006e-08
Insig1	3.90049	2.45175	6.14179e-07	2.86364e-06
Fancd2os	3.89998	4.09188	9.96183e-09	7.58814e-08
Gm26811	3.88371	5.99174	1.46261e-10	2.06203e-09
Gm5106	3.87902	4.78677	1.72792e-09	1.63713e-08
Kif7	3.86765	2.68022	1.69933e-07	9.20812e-07
BC049715	3.86554	3.62691	6.01215e-08	3.76008e-07
Gm49179	3.86046	3.37862	5.69132e-07	2.67537e-06
Gm29054	3.85706	6.26244	2.61205e-11	5.01646e-10
Krr1	3.81783	9.73674	3.13455e-19	3.25915e-16
Lef1	3.76718	3.84404	1.08292e-07	6.26405e-07
Gm26738	3.75122	6.55215	5.55707e-12	1.39228e-10
Gm40645	3.75108	3.55357	1.43022e-07	7.99499e-07
Rmdn3	3.74482	4.18519	4.19665e-08	2.79262e-07
Wdr5b	3.73647	7.42491	1.79438e-13	8.7798e-12
4930597O21Rik	3.72296	6.06211	3.33e-11	5.99544e-10
Gm6277	3.71915	3.67001	5.23448e-08	3.35442e-07
Gm11946	3.70783	5.7307	1.59541e-09	1.52888e-08
D10Wsu102e	3.70466	4.88678	3.85541e-09	3.3198e-08
D230025D16Rik	3.68855	3.60752	5.11795e-08	3.28988e-07
6030468B19Rik	3.65483	2.57458	4.62213e-07	2.2301e-06
Gm10475	3.64777	4.34694	9.83054e-09	7.51567e-08
Gm45819	3.61609	3.33679	2.01179e-05	6.37957e-05
Gm2065	3.6051	6.52959	1.11833e-11	2.55557e-10
Gm15743	3.58722	7.16405	1.747e-13	8.75393e-12
Gm26577	3.58462	7.88098	1.64437e-14	1.34097e-12
Ppib	3.55235	2.93969	1.19444e-05	3.98369e-05
Cd84	3.54316	4.79081	6.83206e-08	4.20333e-07
Phox2a	3.53848	3.30708	1.76142e-06	7.37738e-06
Gtpbp6	3.51442	6.26544	5.20679e-10	6.00402e-09
Maff	3.50694	4.5466	4.87462e-08	3.15787e-07
Clhc1	3.50468	2.77047	2.78196e-06	1.10402e-05
Jam3	3.49092	3.26544	1.23727e-07	6.99159e-07
Gm14817	3.47756	3.30609	3.19521e-06	1.25367e-05
Gm31749	3.47486	3.01615	6.40841e-07	2.97462e-06
Mlx	3.45125	3.62495	3.29298e-05	9.96036e-05
Trappc4	3.44749	3.38852	5.05348e-06	1.85503e-05
Marcksl1	3.43581	2.97605	6.4987e-07	3.00646e-06
4930483K19Rik	3.37043	7.82206	5.64881e-14	3.50648e-12
Tlcd3b	3.36831	11.6167	7.06993e-19	5.88077e-16
A930005N03Rik	3.33254	2.93166	1.67989e-06	7.05724e-06
1700020L13Rik	3.32483	5.05165	2.36748e-08	1.67455e-07
Anapc11	3.32306	3.32646	1.69758e-06	7.12436e-06
Pced1b	3.31754	5.42805	5.09957e-09	4.19983e-08
Aldoa	3.28719	4.52337	4.22949e-06	1.59436e-05
Gm14091	3.28002	7.53707	4.35932e-14	2.83595e-12
Gm15792	3.27181	6.54552	2.27418e-11	4.56923e-10
Frs3os	3.25152	4.01808	3.96484e-07	1.94226e-06
Gm37787	3.24878	9.45566	3.58824e-18	1.45447e-15
Mfsd3	3.24757	5.48587	2.83723e-08	1.95689e-07
BC001981	3.24321	3.90879	7.61948e-07	3.46333e-06
Rhof	3.24032	5.32908	4.44246e-09	3.70176e-08
Smcr8	3.23482	4.58582	5.39404e-07	2.5668e-06
Psmb7	3.22333	3.37925	1.29286e-05	4.27765e-05
mt-Ty	3.20329	5.53009	4.53434e-08	2.9674e-07
1810014B01Rik	3.17378	13.0722	1.04671e-19	3.05573e-16
mt-Te	3.16864	7.34042	3.62182e-12	9.59437e-11
Tex2	3.16182	2.904	4.81049e-05	0.000140104
Kctd10	3.15546	4.57481	3.01177e-07	1.53692e-06
Keap1	3.13763	4.75811	1.14132e-05	3.82185e-05
Fam222a	3.13322	3.54447	1.11595e-06	4.87525e-06
Glt8d1	3.10475	3.91194	3.17877e-06	1.24839e-05
Gm17509	3.07327	6.34794	5.42647e-10	6.16631e-09
Gm12043	3.06627	4.69151	1.05022e-07	6.09185e-07
Hmgb2	3.06013	4.11441	1.34735e-06	5.78288e-06
Hirip3	3.04758	4.71269	3.46539e-08	2.34732e-07
Pim1	3.04445	4.07393	1.49015e-06	6.31111e-06
Gga3	3.04394	6.34419	8.38302e-10	8.96272e-09
Eif4a2	3.03647	6.86196	1.48176e-11	3.17661e-10
Mgat2	3.02279	5.05606	6.63945e-08	4.09696e-07
Polg	3.01597	6.93442	5.75982e-12	1.43444e-10
Gm42838	3.0137	5.00268	1.12227e-07	6.44515e-07
Gm26885	3.00211	10.8578	2.20418e-19	3.05573e-16
2600006K01Rik	3.00008	3.26531	2.76356e-06	1.09882e-05
Snrpf	2.98725	3.98257	5.31396e-06	1.92851e-05
Gm14233	2.97981	4.25633	1.68945e-07	9.19687e-07
Rab35	2.9743	3.28382	8.95101e-06	3.06145e-05
Cdh23	2.96643	5.06263	5.77609e-08	3.65643e-07
B4galt1	2.9212	4.41011	5.96236e-07	2.78623e-06
Gm15247	2.91655	3.72353	0.000177017	0.000447819
Gm10143	2.88635	11.2351	1.79639e-18	1.02774e-15
Gm2453	2.8839	5.61958	3.32456e-07	1.67193e-06
Pank2	2.87182	3.6458	3.38587e-06	1.32224e-05
Sub1	2.87038	3.81615	2.73782e-05	8.42827e-05
Gm11788	2.84128	7.07358	1.67066e-12	5.18527e-11
Slc16a11	2.83923	4.2869	5.88354e-07	2.75559e-06
Dclre1c	2.83307	5.81929	1.95271e-09	1.80876e-08
Gm2895	2.82547	5.61215	2.42685e-07	1.2744e-06
4930524O07Rik	2.81463	10.5236	1.16905e-17	3.74005e-15
Gm50092	2.81274	5.0768	1.77121e-06	7.39228e-06
Tada1	2.80675	4.39163	8.11215e-06	2.80219e-05
Coq9	2.804	3.17589	8.46498e-06	2.90957e-05
Slc43a1	2.8011	5.6333	1.79749e-08	1.31615e-07
4930560O18Rik	2.79353	3.79167	3.61996e-06	1.40442e-05
Vps29	2.79259	6.74536	2.61739e-11	5.01646e-10
Ubap1	2.78888	5.81143	7.63007e-08	4.61913e-07
Gm36189	2.78541	3.42718	3.07653e-05	9.37383e-05
Gm16712	2.77322	9.51526	8.58973e-16	1.23189e-13
C130083M11Rik	2.76481	6.19644	1.8221e-10	2.48462e-09
Gm48342	2.76032	10.3176	3.84689e-18	1.45447e-15
Gng13	2.73938	6.30587	3.53811e-10	4.29009e-09
Ckap4	2.73777	3.77404	9.02542e-06	3.08437e-05
Micos10	2.72957	3.11041	2.92389e-05	8.93494e-05
Itgb4	2.7271	3.45201	3.86511e-06	1.4843e-05
Nsun2	2.72513	3.1064	0.000569692	0.00127453
Gm50394	2.71742	8.26892	8.60946e-13	3.11912e-11
Fam13b	2.70767	3.56702	9.70664e-06	3.30359e-05
Bmyc	2.70765	5.05221	3.93653e-07	1.93752e-06
Gm10337	2.70443	3.26269	1.06805e-05	3.60604e-05
Cops6	2.69887	7.38722	6.94351e-11	1.09802e-09
Rapgef3os1	2.69124	3.16332	1.23494e-05	4.09708e-05
Gm17035	2.67625	7.93062	3.39576e-10	4.12952e-09
Gm48574	2.67481	5.57366	7.06517e-08	4.31484e-07
Nusap1	2.66036	6.02971	5.85864e-08	3.69183e-07
Mki67	2.64875	4.66752	1.10748e-06	4.85091e-06
Eid1	2.64129	3.18133	1.5922e-05	5.18152e-05
Gm14302	2.63629	5.46533	1.08773e-07	6.28314e-07
Gm47112	2.61651	6.11017	4.00942e-09	3.41006e-08
Gm31834	2.61111	9.47112	2.1436e-15	2.62212e-13
Gm12999	2.61061	9.8413	9.39263e-17	2.056e-14
Cyc1	2.60462	3.38526	7.82211e-06	2.71327e-05
Gm45760	2.5991	10.1271	3.10425e-16	5.86844e-14
BC037032	2.5876	8.24938	1.97138e-14	1.51832e-12
Ybx3	2.58409	5.00832	5.69295e-07	2.67537e-06
Gm10602	2.56459	7.24859	2.34622e-11	4.64664e-10
Gm15760	2.54707	5.3445	2.75669e-07	1.42601e-06
Bysl	2.54218	9.56885	1.6461e-16	3.26005e-14
Tbc1d17	2.54028	13.6751	1.33395e-18	9.24647e-16
Gm10874	2.53343	5.80483	4.97123e-09	4.10225e-08
Wdr61	2.52846	4.13498	3.88623e-06	1.48979e-05
Mroh8	2.51416	8.80992	2.87748e-13	1.3151e-11
Ezh1	2.51077	3.31778	3.10865e-05	9.4529e-05
Mxd3	2.50844	9.21201	2.76604e-15	3.10918e-13
Rufy1	2.50775	5.50182	3.47846e-08	2.35234e-07
Ezh2	2.49904	3.53602	0.000178896	0.000452297
Slc25a35	2.49415	6.96292	1.05692e-09	1.07939e-08
Clic4	2.48521	4.18735	4.57634e-05	0.000134035
Acat3	2.48104	11.129	1.9769e-18	1.02774e-15
Klc1	2.47522	4.14716	3.70951e-05	0.000111072
Ell2	2.47496	3.45139	3.64943e-05	0.00010943
Sel1l	2.46841	3.82319	5.13173e-05	0.000148112
0610038B21Rik	2.46408	4.54882	5.19658e-06	1.8975e-05
mt-Ta	2.4628	8.22617	6.55199e-13	2.50468e-11
Hdgf	2.46151	4.55652	2.20471e-06	8.97202e-06
mt-Tp	2.43902	9.39724	2.29042e-15	2.72168e-13
St3gal6	2.42658	4.13588	3.56551e-06	1.38588e-05
Canx	2.42421	4.61802	2.28643e-06	9.26828e-06
A430088P11Rik	2.42339	4.33795	4.62046e-06	1.72037e-05
Gm13199	2.41221	8.35694	2.83556e-12	7.80999e-11
Gm50336	2.40984	5.66548	2.22824e-08	1.58686e-07
Gm46218	2.39901	6.27373	9.021e-09	6.94784e-08
Hif1a	2.39187	4.44101	0.000358897	0.000844259
Gm44085	2.39156	5.78784	7.81382e-08	4.69778e-07
Riox2	2.38315	6.03955	5.21688e-09	4.27107e-08
Rnf146	2.37763	9.02846	5.53258e-15	5.47857e-13
Dxo	2.37685	4.79163	1.46876e-06	6.24598e-06
1700030C12Rik	2.36848	7.84798	8.77465e-13	3.11912e-11
Gm45453	2.36702	4.66535	1.77208e-06	7.39228e-06
Fndc9	2.36334	8.20055	5.68043e-13	2.29368e-11
Gm42529	2.35971	4.1545	7.08922e-06	2.48811e-05
Syngr2	2.35419	3.95858	1.31919e-05	4.35092e-05
1700120K04Rik	2.34603	5.15185	1.96033e-07	1.0493e-06
4933408J17Rik	2.3426	8.77286	2.04701e-11	4.15293e-10
Gm11110	2.33881	5.80236	2.49022e-08	1.75539e-07
2310033P09Rik	2.3336	3.65948	1.78825e-05	5.73797e-05
Dnah11	2.32647	6.94278	5.82483e-11	9.46308e-10
Ndufaf3	2.3206	5.73728	2.26444e-07	1.20279e-06
G530011O06Rik	2.31387	4.36781	9.91452e-06	3.36883e-05
Eif1ax	2.31018	4.45746	6.99426e-05	0.000195772
Nudc	2.30502	3.7116	3.36677e-05	0.000101614
Hsp90b1	2.30077	7.76723	1.73579e-09	1.64072e-08
Gm9905	2.29901	8.25627	1.85147e-13	8.85087e-12
Vps35	2.29747	4.63206	1.92078e-06	7.97257e-06
Tmem132a	2.29096	8.70977	4.00701e-14	2.77753e-12
Ccdc116	2.29081	5.48241	3.65421e-07	1.8201e-06
Tspan31	2.28595	5.62105	9.12885e-08	5.4161e-07
Lmnb1	2.28205	3.5751	2.76257e-05	8.49817e-05
Gm20163	2.28151	4.11354	3.23187e-05	9.79691e-05
Mroh2a	2.27941	8.31885	3.12409e-13	1.41229e-11
Gm47210	2.27799	6.48851	7.77038e-10	8.48154e-09
Wsb2	2.27484	5.05326	1.19881e-06	5.20445e-06
A230087F16Rik	2.27269	6.61194	4.95928e-10	5.77749e-09
Gm28626	2.26738	5.37259	1.42399e-07	7.9709e-07
Gm44732	2.26497	4.84976	1.31316e-06	5.65366e-06
Gm41396	2.26155	8.26186	1.99406e-11	4.06534e-10
Usp34	2.24455	9.32977	5.25537e-14	3.31168e-12
1700101I11Rik	2.24033	4.78858	7.3571e-06	2.56837e-05
Trim24	2.23218	4.67473	2.60957e-06	1.04358e-05
Nup50	2.22745	3.57197	0.000143571	0.000370418
Vav2	2.22549	4.84011	4.54622e-06	1.69881e-05
mt-Tc	2.22261	6.28182	4.05039e-07	1.97718e-06
9530018F02Rik	2.22095	3.36304	0.000457497	0.00104834
Gm8774	2.21721	4.31824	4.50996e-05	0.000132371
Rnf19b	2.21506	3.60883	7.56538e-05	0.000208788
Gm44775	2.20536	5.81108	3.41334e-07	1.70831e-06
Eme1	2.20131	8.41767	6.6105e-12	1.61507e-10
Malsu1	2.18278	7.0612	7.33298e-10	8.06822e-09
Pdha1	2.17967	5.32781	2.34432e-05	7.3226e-05
Alg3	2.17619	5.55587	1.37299e-06	5.88081e-06
Atp8b2	2.16971	4.16339	7.23736e-05	0.000201474
Clec4g	2.16889	4.696	1.36748e-05	4.49592e-05
Lrrc47	2.16734	3.43175	0.000345244	0.000814909
Cyb5r3	2.16697	5.16258	1.488e-06	6.31111e-06
Akap9	2.16297	6.86884	1.72806e-09	1.63713e-08
Fkbp8	2.15784	4.81854	1.28855e-05	4.26679e-05
Gm45669	2.1555	6.34978	6.18403e-09	4.95557e-08
Mafg	2.15388	3.65948	0.000114478	0.000302486
Cdk4	2.14402	9.203	1.90914e-14	1.49813e-12
Mir1905	2.1313	4.19779	8.52903e-05	0.000232758
Gm15890	2.13005	3.86384	8.1544e-05	0.000223413
Pip4p1	2.12927	10.6705	5.95001e-15	5.75491e-13
Arl5c	2.12796	4.78278	4.6544e-05	0.000135938
Hyou1	2.12788	3.4151	0.000380192	0.000888325
Gm50068	2.12495	5.7534	1.39217e-07	7.82438e-07
Rps2	2.11825	4.51128	0.000409046	0.000947229
Trip4	2.11715	4.72209	3.41897e-06	1.33391e-05
Psmd7	2.11482	3.79287	0.000141876	0.00036627
Lhb	2.11333	3.89418	0.000137594	0.000356321
Gm12905	2.09925	7.08614	8.37707e-10	8.96272e-09
Nek6	2.09854	10.7818	4.4494e-16	7.45215e-14
Ercc2	2.08411	4.61657	4.74131e-05	0.000138186
Gm44198	2.08003	3.99912	0.000212747	0.000530146
Paip2	2.07674	5.43238	3.78328e-07	1.87095e-06
Scyl3	2.07448	6.75345	1.89108e-08	1.37788e-07
Ccdc38	2.07302	9.17267	6.88409e-14	4.09014e-12
Dhx57	2.07107	4.19888	8.55702e-05	0.000233368
Gm11491	2.06195	7.87972	5.15601e-12	1.29963e-10
Gse1	2.06041	7.2368	1.20856e-09	1.21275e-08
Gm38155	2.05986	6.6498	9.7121e-10	1.01235e-08
Ybx1	2.05889	5.87006	2.0879e-07	1.11471e-06
Mir1957b	2.05732	5.08285	6.69902e-06	2.3697e-05
1600012H06Rik	2.05111	7.7903	9.65498e-12	2.2559e-10
Thyn1	2.03848	4.40379	1.86482e-05	5.93859e-05
Eprs	2.03793	3.47138	0.000464406	0.00106269
Gm11100	2.02977	9.45275	9.1397e-15	8.44711e-13
Atf5	2.02862	8.6671	8.67074e-13	3.11912e-11
Rnaseh2a	2.02832	8.62756	4.21302e-13	1.80638e-11
Gm44036	2.02749	5.3025	9.47941e-07	4.21206e-06
Ivns1abp	2.027	5.86198	6.55548e-07	3.02936e-06
Cfap410	2.02313	5.5492	4.87075e-07	2.33381e-06
Xrcc6	2.0198	8.73431	1.76827e-13	8.75502e-12
2310001H17Rik	2.01714	6.24864	8.75106e-07	3.9202e-06
Gm26631	2.01311	10.5446	1.13349e-15	1.5207e-13
Gm5831	2.00711	5.98071	3.41805e-08	2.31903e-07
4731419I09Rik	2.00287	6.1417	1.02807e-07	6.00526e-07
mt-Nd2	1.9979	7.7068	2.42823e-11	4.76368e-10
Rnf167	1.99163	4.30687	4.35151e-05	0.000128172
Gm10197	1.98307	7.51453	2.04373e-08	1.47056e-07
Gm49150	1.97596	6.77125	2.45641e-09	2.22575e-08
Gm47327	1.97273	7.18608	9.61653e-10	1.0049e-08
Primpol	1.96961	6.49587	5.98729e-09	4.81647e-08
Gm16984	1.96955	7.94882	1.02077e-11	2.36325e-10
Gm43361	1.96304	8.99175	1.07172e-12	3.56582e-11
Kcnk7	1.95882	3.48485	0.000659595	0.00145146
Galr2	1.95692	3.66615	0.000256583	0.000625516
Phykpl	1.95294	12.7473	1.01538e-14	9.18038e-13
mt-Tn	1.95059	6.76256	1.05579e-07	6.11562e-07
Gm14573	1.9496	6.20505	2.52352e-07	1.3152e-06
Alyref	1.94737	3.92675	0.000237476	0.00058338
Gm13066	1.94558	4.62129	2.26912e-05	7.11708e-05
Gm15829	1.94233	7.87918	3.32961e-10	4.06095e-09
Naa15	1.94142	4.03343	0.000102945	0.000276404
Acbd5	1.93985	3.86574	0.000137367	0.000356179
Gm26642	1.9268	8.99753	6.44399e-13	2.50468e-11
Lonp1	1.92367	3.73585	0.000570008	0.00127455
Txnrd2	1.9222	4.93087	1.66786e-05	5.38144e-05
C030005K06Rik	1.92199	6.28264	1.17485e-07	6.68425e-07
Asxl1	1.91634	4.71019	7.95072e-05	0.000218842
Gm14455	1.91023	4.13289	0.000121933	0.000319948
Aebp2	1.90938	5.62356	2.0071e-06	8.25777e-06
Gm26737	1.90679	7.75689	4.40413e-10	5.20363e-09
Sfmbt1	1.90662	3.6898	0.000196044	0.000491468
Tk1	1.90457	7.47404	5.29879e-10	6.05431e-09
Pou2af1	1.89799	4.00119	0.000164385	0.000419178
P2rx3	1.89637	8.61112	1.71871e-11	3.57405e-10
Gm13008	1.89225	8.77408	3.53403e-13	1.58043e-11
Becn1	1.89064	3.81459	0.000466206	0.00106536
Tnk1	1.88614	3.61173	0.0009352	0.00198242
Prss57	1.88436	5.93622	4.71433e-07	2.27195e-06
Ddb1	1.88429	4.08177	0.000689382	0.00151141
Pcbp2	1.88176	5.0946	4.21882e-06	1.5922e-05
Dhx58os	1.87445	8.09082	1.34793e-09	1.31907e-08
1700060J05Rik	1.86793	5.54375	4.16838e-06	1.5789e-05
Phax	1.86682	4.9958	6.91638e-06	2.43773e-05
Sec11c	1.86473	3.95221	0.00216282	0.0042611
Spcs1	1.86359	4.60651	8.66071e-05	0.000235887
Suz12	1.8623	3.96373	0.000123465	0.000322748
Gm10138	1.85483	10.2236	2.94952e-14	2.11501e-12
Gm28913	1.8536	5.17072	4.97682e-06	1.83174e-05
Mcmdc2	1.84493	6.3259	5.67357e-08	3.59701e-07
Lrrc24	1.84182	5.04564	7.89066e-06	2.73477e-05
Gm28914	1.83929	5.1358	1.61255e-05	5.23137e-05
Gm10653	1.83829	5.84249	3.88993e-07	1.91685e-06
Gm42413	1.82978	10.2168	1.09737e-14	9.50825e-13
A930035D04Rik	1.82762	4.8142	1.69735e-05	5.46382e-05
AY074887	1.82736	8.03012	5.73813e-11	9.38056e-10
Ccn6	1.82388	4.06932	0.000816519	0.00175862
1700018A23Rik	1.81856	8.91452	4.53526e-13	1.91585e-11
H2aj	1.81749	4.01869	0.000646871	0.00142875
Gm17206	1.81259	6.81082	1.98854e-08	1.43333e-07
Gstz1	1.8105	7.7578	1.24661e-09	1.24034e-08
Gm9823	1.80762	11.1215	7.8021e-16	1.15889e-13
Gm44002	1.80097	7.65974	2.25722e-10	2.94288e-09
G3bp1	1.79606	3.64725	0.000716256	0.00156127
Kif4	1.79136	6.65297	2.52938e-08	1.77998e-07
Rpl41	1.78766	4.39211	0.000222004	0.000549919
Sdf2	1.78729	5.25931	6.95932e-06	2.45079e-05
Ankrd28	1.7765	4.59192	6.34658e-05	0.000179439
Gm44729	1.7759	9.77111	2.10493e-12	6.34376e-11
Gm10734	1.77461	8.52639	3.65703e-11	6.51274e-10
Ccnc	1.76896	7.80434	9.38335e-11	1.39376e-09
Shc4	1.76627	10.367	7.13321e-14	4.17845e-12
Gm14232	1.76383	4.65664	4.49361e-05	0.000132171
AI413582	1.76055	5.20634	5.44489e-06	1.96916e-05
Gm14820	1.75972	9.23916	4.86871e-12	1.2577e-10
Gm16062	1.75859	9.19373	2.32442e-12	6.80794e-11
Klhl42	1.75402	3.73327	0.000512591	0.00115611
Tbc1d8	1.75058	7.35336	8.89815e-10	9.37316e-09
Psmc1	1.74782	3.86713	0.00172949	0.00347654
Rrp7a	1.7476	8.22648	1.42974e-11	3.12962e-10
Smim27	1.74469	8.74351	6.41619e-12	1.57899e-10
Ddit3	1.74207	6.8968	9.90239e-09	7.5567e-08
Ube2m	1.73997	4.86219	4.09645e-05	0.000121607
Pdia3	1.73451	5.24552	1.07969e-05	3.63303e-05
Gm17080	1.73339	7.88994	1.66272e-10	2.3068e-09
Gm48145	1.73203	3.98666	0.000434633	0.00100035
Gm10550	1.72849	8.43655	1.45369e-11	3.13259e-10
Gm48746	1.72424	5.30346	1.79399e-05	5.7394e-05
Wapl	1.7207	4.85712	2.86541e-05	8.78205e-05
Psph	1.7204	8.63299	1.30571e-10	1.86613e-09
Ppp1r14b	1.71877	4.42455	0.000275153	0.000664554
C77080	1.71706	5.27483	1.39687e-05	4.57809e-05
Sqstm1	1.70673	7.18159	1.84142e-09	1.7133e-08
Zfc3h1	1.7064	4.20849	0.000566321	0.00126835
Eif2ak1	1.70631	8.57919	3.18861e-11	5.81642e-10
Gm20512	1.70539	9.4976	2.96391e-11	5.50309e-10
Anp32e	1.7045	3.54332	0.00119156	0.00246552
Stard6	1.70198	4.5207	0.000120269	0.000315981
Gm15945	1.70165	5.70607	4.23221e-06	1.59436e-05
Loxl3	1.7011	9.46618	1.17453e-12	3.8163e-11
Npm1	1.70074	6.87674	7.48668e-07	3.41042e-06
Hnrnpd	1.69588	6.15598	1.52632e-06	6.45119e-06
Rpl35a	1.69515	2.94438	0.0257707	0.0398143
Sem1	1.68987	4.2826	0.00362875	0.00680432
Tex9	1.68704	5.73765	4.76671e-06	1.76849e-05
Stat3	1.6837	5.70383	2.26858e-06	9.20491e-06
Otulinl	1.68329	5.77132	4.44282e-06	1.66316e-05
Gm37676	1.68295	8.48151	6.37018e-11	1.01508e-09
Gm50149	1.67975	5.67035	1.96272e-06	8.13041e-06
Mrpl13	1.67917	6.79037	1.23259e-08	9.25335e-08
Gm10459	1.67348	8.95867	3.56028e-11	6.38241e-10
Rrp1	1.66958	4.28997	0.000311097	0.000743801
Nudcd1	1.66453	8.8757	1.65008e-11	3.46599e-10
Ddx28	1.66209	5.10856	4.21556e-05	0.000124787
Ttc41	1.65641	4.04464	0.000891445	0.00189532
Mical3	1.65496	4.91371	7.40892e-05	0.000205151
Ercc1	1.65041	6.49183	8.28817e-07	3.73867e-06
Fam166a	1.64681	8.75997	4.85564e-11	8.24269e-10
Gm45022	1.64178	5.43067	9.40285e-06	3.20808e-05
6430562O15Rik	1.63653	8.61562	3.6643e-11	6.51274e-10
Gm20604	1.6354	8.2738	9.18976e-11	1.3699e-09
Rbm18	1.63469	4.71171	0.000123245	0.000322578
D430001F17Rik	1.63266	9.64676	4.61437e-13	1.91912e-11
Gm17661	1.63136	6.91314	1.34152e-07	7.55128e-07
Rapgef1	1.62744	4.30991	0.000393849	0.000917657
Gm49383	1.62579	8.05206	2.37497e-10	3.08611e-09
Dok4	1.61492	6.53104	9.09251e-08	5.40225e-07
Gm44170	1.61324	10.8506	8.0015e-14	4.55866e-12
Gm11201	1.61258	6.67538	1.04572e-07	6.07421e-07
Gm28989	1.60965	7.25962	4.17489e-09	3.51485e-08
Rab21	1.60701	4.86928	9.73738e-05	0.000262631
2610020C07Rik	1.60634	9.78095	1.10604e-11	2.54144e-10
Gm26672	1.60406	4.47147	0.000240815	0.000590884
Gm20535	1.60328	4.19487	0.00103877	0.00217534
Trmt13	1.59746	7.15145	1.63519e-08	1.20795e-07
Pdzd9	1.59718	9.86266	6.62454e-13	2.50468e-11
9530080O11Rik	1.59518	6.23619	2.92658e-07	1.49897e-06
mt-Rnr2	1.59443	5.69511	0.000823768	0.00177273
Gm16272	1.59069	8.57995	2.93952e-11	5.48227e-10
B3gntl1	1.58964	7.55416	4.2786e-09	3.58764e-08
Gm49727	1.58932	8.41008	1.9784e-10	2.6587e-09
Nfkb1	1.58759	3.68892	0.00804895	0.0139365
4930558J22Rik	1.58349	4.61066	0.000477451	0.00108806
Gm2245	1.58311	4.00107	0.00128071	0.00262862
Orc2	1.57098	3.98547	0.000750295	0.00162779
Mtdh	1.57084	6.62742	8.02633e-07	3.63237e-06
Larp1	1.57015	4.41719	0.00288987	0.00555919
0610005C13Rik	1.56977	6.89429	2.28222e-08	1.617e-07
Gm9754	1.56846	9.23672	2.00991e-12	6.10161e-11
Yipf3	1.56797	3.89176	0.00195703	0.003893
Surf2	1.56752	7.28859	7.33766e-09	5.75799e-08
Lrrc57	1.56422	5.17972	3.43801e-05	0.000103689
Hoxb3os	1.55953	4.42827	0.000508048	0.00114711
Gm15726	1.55898	5.52151	1.17294e-05	3.91827e-05
Marcks	1.55035	7.1154	1.03507e-07	6.03765e-07
Mpp1	1.54681	5.77606	1.31018e-05	4.32464e-05
Mypopos	1.54532	3.84807	0.00181049	0.0036228
Zswim8	1.5451	4.39657	0.000830954	0.00178509
Mrpl47	1.54309	9.82303	3.10486e-12	8.38515e-11
Gm47958	1.5406	6.21292	3.71737e-07	1.84454e-06
Gm44986	1.53595	7.97465	7.79021e-10	8.48154e-09
Gm37539	1.53517	6.12828	1.05982e-06	4.66432e-06
Tomt	1.53516	9.83715	4.56046e-13	1.91585e-11
Cfap157	1.53425	4.94307	0.000247225	0.000603763
Trub2	1.53394	5.07833	0.000187524	0.000471816
Sptbn2	1.53257	4.26539	0.00124831	0.00256888
Hars2	1.52895	8.07254	2.88622e-09	2.57592e-08
Dnajc14	1.52667	8.72461	1.05628e-10	1.54143e-09
Gm33051	1.52369	10.7335	7.31839e-14	4.22738e-12
Zfp513	1.52289	4.79954	0.000648669	0.00143047
Gabpa	1.52154	8.12023	3.26676e-10	4.00781e-09
Gm43031	1.52097	4.76693	0.000156703	0.000401556
Fgf22	1.51899	6.24559	5.80275e-07	2.72082e-06
Znhit3	1.51742	3.8278	0.00291615	0.00560455
Cacfd1	1.50714	4.63598	0.00278281	0.00537063
1700110K17Rik	1.50539	5.50863	1.56842e-05	5.11213e-05
Rpl28	1.50418	6.33687	6.4299e-07	2.98126e-06
Btbd18	1.50293	4.57495	0.000268539	0.00065009
Snw1	1.5022	5.49049	1.86783e-05	5.94362e-05
Gm17122	1.5014	8.8664	8.9118e-11	1.33324e-09
Gm21691	1.50047	6.8982	6.38042e-08	3.96654e-07
Nop58	1.49399	3.93602	0.00610242	0.0108554
Hspd1	1.49391	4.30948	0.000855303	0.00182984
4930455C13Rik	1.48732	8.71332	4.70835e-11	8.02542e-10
Cmtr1	1.48596	8.0159	8.6521e-10	9.17961e-09
Gm10658	1.47758	6.69475	3.88726e-07	1.91685e-06
Ywhae	1.47673	4.79749	0.00070928	0.00154932
Pdia4	1.4746	3.86149	0.0184937	0.0296056
Gm48045	1.46952	8.76724	8.03838e-11	1.2246e-09
Calm3	1.46847	4.94021	0.000137489	0.000356271
Dock3	1.4667	4.24228	0.00122453	0.0025287
Rundc3a	1.4631	4.48985	0.000482456	0.00109767
Gm45053	1.45987	5.95731	3.71173e-06	1.43334e-05
Gm10535	1.459	5.38747	2.85439e-05	8.7612e-05
Fam83f	1.45889	4.11202	0.00250781	0.00488523
Gm13427	1.45685	7.29902	1.19125e-07	6.76833e-07
Tmem129	1.45481	4.02354	0.00190871	0.00380371
Gm16796	1.45413	6.92214	2.91105e-07	1.49285e-06
Coa6	1.45411	4.47824	0.000615852	0.00136823
Gm26787	1.45314	7.31832	1.54074e-08	1.14428e-07
Ptcd1	1.45169	9.36569	7.11413e-11	1.09991e-09
Eif3b	1.45009	4.57312	0.000579654	0.00129334
Smarcb1	1.44772	5.44369	0.000107094	0.000285517
Sla2	1.44706	10.1542	5.14027e-11	8.62031e-10
Rtbdn	1.44152	4.08901	0.00124748	0.00256888
Gm48226	1.43995	4.6304	0.000569081	0.00127385
Jmjd6	1.43815	4.30743	0.00195467	0.00389156
Rab5if	1.43638	3.74438	0.00313049	0.00596687
Gm45758	1.43587	6.4671	1.16766e-06	5.07982e-06
Gm16121	1.43027	6.61376	5.99964e-07	2.80051e-06
Rbm3os	1.4302	10.7086	1.16388e-12	3.81149e-11
Gm10676	1.43004	4.66858	0.00064818	0.00143047
Ppp3r1	1.42996	4.56958	0.0010267	0.00215224
Fancf	1.42949	3.9442	0.00426009	0.00787455
Gm15938	1.42728	5.31171	0.000141328	0.000365309
Wdr26	1.42109	5.12038	0.000113354	0.000299898
Usp16	1.42049	5.39461	5.68553e-05	0.000162628
Hsp90aa1	1.42039	6.24927	2.76774e-06	1.09943e-05
Mettl5	1.42002	10.0276	1.81729e-12	5.55742e-11
Gm43791	1.41857	4.97267	0.000242949	0.000595769
Tomm6os	1.41719	10.2023	5.12285e-13	2.08882e-11
mt-Cytb	1.41675	8.68271	4.53779e-08	2.9674e-07
Ydjc	1.41387	8.25015	4.34058e-09	3.63229e-08
Gm10252	1.41349	12.3204	8.59144e-15	8.12086e-13
Csnk1d	1.41285	4.21233	0.00128113	0.00262862
2200002D01Rik	1.41178	7.84484	2.82149e-09	2.53447e-08
Gm44771	1.41078	7.62558	7.13512e-08	4.35117e-07
Abhd14b	1.4107	4.95412	0.000300873	0.000720813
Thoc6	1.40986	5.97261	1.66722e-05	5.38144e-05
Gspt1	1.40419	4.55866	0.00105059	0.00219788
Spef1	1.40332	8.79621	7.97057e-11	1.21873e-09
Exoc3l	1.4015	4.20006	0.00391479	0.0072979
Nono	1.40061	4.59679	0.00101232	0.00212746
Gm37256	1.39825	5.00764	0.000122712	0.000321636
Gm1976	1.39725	5.82958	1.33663e-05	4.39797e-05
Gm43126	1.39646	8.11907	5.20621e-09	4.27073e-08
Gm43118	1.39461	9.3189	1.0885e-10	1.5829e-09
Smc1a	1.39285	3.51882	0.0317786	0.0481132
Gm12356	1.38964	8.20884	2.78006e-09	2.50266e-08
Rhoq	1.38785	7.54912	9.49787e-09	7.2747e-08
Gm9988	1.38018	7.70356	2.39489e-07	1.264e-06
Xrcc3	1.37853	8.46135	7.15437e-09	5.65685e-08
Gm15927	1.37675	8.69787	1.27203e-09	1.26262e-08
Gm12500	1.37562	7.20531	6.98266e-07	3.2054e-06
Spopl	1.3745	4.52382	0.00159873	0.00323557
Gm17089	1.37005	6.00885	1.12389e-05	3.77262e-05
Zranb2	1.36631	3.91922	0.00797339	0.0138287
Slc24a5	1.36459	8.50931	1.77388e-09	1.67291e-08
Traf3ip1	1.36343	4.13744	0.00356231	0.00669483
Dnajb13	1.36223	7.95127	3.71164e-09	3.21598e-08
Nudt1	1.35176	6.87264	1.04788e-06	4.62157e-06
Pde12	1.35139	4.5783	0.00170364	0.00343106
Gm8373	1.3493	7.04986	1.32702e-07	7.48858e-07
Gm17108	1.34924	10.0337	2.69843e-11	5.12456e-10
Hspa9	1.34806	3.96529	0.00443707	0.00816177
Kdm1b	1.34724	10.0178	8.97743e-12	2.13355e-10
Gm28800	1.34689	5.98091	6.24612e-06	2.22984e-05
Ccdc117	1.34685	4.95213	0.000259799	0.000632242
Calr	1.34568	5.48445	0.00183467	0.00366317
Ggnbp1	1.34504	8.41955	2.12068e-09	1.95131e-08
Zbtb12	1.34379	4.22049	0.00222649	0.00437823
Pcbp1	1.34291	4.00714	0.00487188	0.00886359
Zbtb37	1.34276	5.9312	1.23336e-05	4.09708e-05
Ssrp1	1.3416	4.5544	0.00255236	0.00496272
Gm42858	1.34113	6.97733	1.20225e-06	5.21394e-06
Psma4	1.3401	4.42514	0.0029854	0.00571652
Supt20	1.33975	7.12848	1.92409e-07	1.03122e-06
Mlst8	1.33894	4.70988	0.00127872	0.00262628
Gm20628	1.33784	4.12946	0.00966388	0.0164519
Rnf34	1.33531	7.96066	7.79912e-09	6.04032e-08
Nasp	1.33397	4.22094	0.00453214	0.00831458
Xpa	1.33352	8.04326	4.31219e-08	2.86022e-07
Prorp	1.3301	6.43382	1.02257e-06	4.52432e-06
Pip4k2b	1.32957	3.77708	0.0056526	0.010142
Gm48933	1.32883	7.48392	1.5356e-08	1.1425e-07
Gm10767	1.32521	8.32914	1.3125e-09	1.29476e-08
Prpf39	1.3206	9.94582	1.33382e-11	2.96651e-10
Gm15884	1.31892	10.8301	2.20017e-12	6.48973e-11
Gpank1	1.31703	4.06719	0.00436422	0.00803843
Mars1	1.3161	5.64376	0.00011061	0.000294136
Tcp1	1.31294	4.64158	0.00212686	0.00419821
Ssr3	1.31239	4.07583	0.0109962	0.0185011
Gon4l	1.31094	7.12084	1.55754e-07	8.56852e-07
Chmp4b	1.30906	5.11756	0.000527851	0.00118795
Sod1	1.30731	4.65002	0.00328707	0.00623388
Tbcb	1.30721	7.18917	1.20649e-07	6.83621e-07
Tgm4	1.30657	7.10802	1.98745e-07	1.06244e-06
Ccdc78	1.30652	4.9604	0.000705419	0.0015425
Tmpo	1.30628	4.16545	0.00552196	0.00992902
Cideb	1.29819	6.12809	0.000103731	0.000278154
Serhl	1.29605	9.328	2.98713e-10	3.69747e-09
Gadl1	1.28859	6.12185	1.80839e-05	5.78101e-05
Msh6	1.28854	4.88174	0.00074835	0.00162442
Mrpl27	1.28759	3.85166	0.00560977	0.0100739
Nkapd1	1.28743	7.20625	2.45253e-07	1.28142e-06
Tcf3	1.28738	4.75854	0.000626098	0.00138729
Gm12977	1.28682	8.60346	6.39161e-10	7.11527e-09
Oip5os1	1.2828	4.73115	0.00086863	0.00185358
Yrdc	1.28155	5.38532	0.00014699	0.000378066
mt-Tq	1.28082	6.79464	2.09953e-06	8.59444e-06
D830035M03Rik	1.2806	4.78497	0.0006626	0.0014573
Rnf139	1.27866	5.99049	1.78941e-05	5.73797e-05
Gm12868	1.27401	8.63689	3.98635e-09	3.40738e-08
Gm31462	1.27218	3.91601	0.00967089	0.0164571
Atic	1.27079	4.99596	0.000404754	0.000939905
Ccnd3	1.27068	4.57905	0.00227438	0.00446397
Gm17638	1.26947	11.9281	1.05958e-12	3.56582e-11
Rpgrip1	1.26716	9.77089	4.05746e-11	7.06066e-10
Plod3	1.26495	6.89547	5.06779e-07	2.42263e-06
Tmem94	1.26208	4.00975	0.00433947	0.00799994
Ccna2	1.26074	8.55118	3.6011e-09	3.12672e-08
Gm15559	1.25776	8.516	1.14727e-09	1.15813e-08
Gm16793	1.25682	6.86752	6.9351e-07	3.19061e-06
Gm17949	1.25588	6.34241	4.88978e-06	1.8093e-05
Ankrd49	1.25558	5.89305	5.17905e-05	0.00014927
Gm11508	1.25541	10.5484	2.58726e-11	5.00484e-10
Macroh2a1	1.25323	5.53569	6.35632e-05	0.000179541
Gm13068	1.25241	6.47693	2.06007e-05	6.52042e-05
Ruvbl2	1.25082	6.9483	4.39534e-07	2.12808e-06
Gm15540	1.25021	5.06572	0.000487007	0.00110681
Inpp5e	1.2493	9.4228	1.81226e-10	2.47934e-09
Rxrb	1.24896	3.97449	0.00971607	0.0165205
Gm10432	1.24777	4.47888	0.00746255	0.0130133
Lpcat3	1.2466	7.10178	3.96055e-07	1.94226e-06
Hspa5	1.24201	5.91019	0.000613038	0.00136271
Gm20406	1.23978	7.93126	2.81019e-07	1.45187e-06
Fbl-ps2	1.23852	6.50125	2.62525e-06	1.04884e-05
Nab1	1.23264	4.22795	0.00547848	0.0098551
Rps26	1.23241	5.59361	0.000106111	0.00028344
Pfkp	1.23221	7.35283	1.53993e-07	8.5054e-07
Gm11842	1.22913	3.85362	0.0171693	0.0276987
Eml5	1.22883	8.66688	1.93115e-09	1.79278e-08
Spout1	1.22742	7.08286	5.7373e-07	2.69316e-06
mt-Nd1	1.2262	7.20261	0.000315964	0.000753926
E130317F20Rik	1.22428	9.9074	6.14637e-11	9.90805e-10
Gm45732	1.22243	7.49718	2.42428e-07	1.2744e-06
Dusp4	1.22242	3.7406	0.0186381	0.0297952
Snx22	1.21963	12.2172	1.31896e-13	7.1241e-12
Mrpl10	1.21932	4.29518	0.00503884	0.00914334
Gm17017	1.21748	9.50915	4.38971e-11	7.51309e-10
Myo19	1.21684	6.51627	8.35676e-06	2.87475e-05
Arpc1b	1.2148	6.73614	1.07889e-06	4.73823e-06
Gm17134	1.21265	10.9234	1.06929e-12	3.56582e-11
B430218F22Rik	1.20253	9.46359	9.92781e-10	1.02711e-08
mt-Nd5	1.20007	9.29752	3.12466e-09	2.77089e-08
Mcm9	1.19966	9.08764	2.11464e-09	1.95006e-08
Gm15964	1.19738	9.94139	1.81518e-09	1.7003e-08
Gm26850	1.1945	8.37462	3.76479e-09	3.25431e-08
Rpl22l1	1.19384	4.95721	0.00417499	0.00773098
1500002C15Rik	1.19366	9.63987	5.61712e-11	9.27048e-10
Gm6598	1.18986	7.97027	2.76553e-08	1.92018e-07
Ap4m1	1.18316	9.37983	8.73423e-10	9.24317e-09
Plpp1	1.18226	7.14304	1.59728e-05	5.19398e-05
Smim19	1.18218	5.34292	0.000428286	0.000986838
Atl1	1.18128	10.4444	3.8346e-11	6.75767e-10
Gm42884	1.17973	5.84422	5.74608e-05	0.000164134
Ptma	1.17866	7.20872	0.000238684	0.000586001
Atp1a1	1.17777	4.16944	0.0177057	0.0285197
Tbc1d22bos	1.17693	6.68617	2.10477e-06	8.60742e-06
Tap1	1.17655	5.57366	0.00028972	0.000697709
Dis3l	1.17637	4.90403	0.000907989	0.00192768
A230005M16Rik	1.17617	10.7831	2.77381e-12	7.69086e-11
Ptpre	1.17554	5.71486	0.00022037	0.000546523
Gm17477	1.17521	8.32129	1.62304e-08	1.20111e-07
Top1	1.17181	3.83777	0.0136271	0.0224456
Gm16066	1.16919	6.45567	4.06364e-05	0.000120806
Gm12898	1.16512	6.93534	1.48888e-06	6.31111e-06
Gm45236	1.16307	7.55652	9.95446e-08	5.86411e-07
Crbn	1.15985	8.79242	7.25154e-09	5.71196e-08
Mea1	1.15887	7.88299	3.91874e-08	2.63166e-07
Map3k12	1.1571	11.7236	1.73646e-13	8.75393e-12
Gm47079	1.15698	9.35764	2.11487e-10	2.78346e-09
Gm28901	1.15306	4.42123	0.00963811	0.0164215
Ncl	1.14903	6.74245	0.000123356	0.000322666
Tmem123	1.14648	5.84092	0.000208065	0.000520037
Gm44616	1.14495	7.02616	3.67222e-06	1.42204e-05
Endog	1.14377	8.15153	2.64877e-08	1.85147e-07
4930551O13Rik	1.14279	5.60576	0.000357701	0.000841924
Rad51	1.1412	7.02121	4.61524e-06	1.71996e-05
Dalrd3	1.13047	9.1792	6.39844e-10	7.11527e-09
Rhbdd3	1.12965	9.66185	1.41921e-10	2.00766e-09
7530414M10Rik	1.12826	4.92496	0.00278593	0.00537415
Dnajc19	1.12677	9.12359	6.31489e-10	7.06012e-09
Rps27a	1.1254	4.44788	0.0198831	0.0315747
Eaf1	1.12469	6.65675	5.23232e-06	1.90553e-05
Acss2os	1.12366	5.59171	0.000189621	0.000476517
Oaz3	1.12267	9.1348	6.95902e-09	5.52339e-08
Gm38316	1.12097	7.99016	1.04223e-07	6.06823e-07
Tmed5	1.11967	9.03757	1.04132e-09	1.06934e-08
Gm17092	1.11922	11.3895	2.48571e-12	6.98517e-11
Gm7008	1.11698	8.07665	3.1294e-07	1.58143e-06
Tvp23a	1.11681	10.8039	1.26145e-11	2.85129e-10
Ppig	1.11572	4.73041	0.00601731	0.010727
BC024978	1.11569	9.72771	3.8199e-10	4.60492e-09
Gm42893	1.11445	7.10826	4.08321e-06	1.55087e-05
Gm10553	1.11386	5.04595	0.00245886	0.00480113
Stk11	1.1135	3.93146	0.0147245	0.024053
A730017L22Rik	1.11304	3.58925	0.0255252	0.0394644
Gja5	1.1115	6.33989	1.51897e-05	4.95483e-05
Agbl5	1.11077	10.5235	6.2169e-11	9.97258e-10
Fbxo11	1.10919	5.52409	0.000416569	0.00096304
Tyw5	1.10866	7.59456	6.65911e-07	3.07383e-06
Abi1	1.10842	4.58688	0.00477724	0.00872193
Snapin	1.1079	6.36282	0.000111513	0.00029597
Zdhhc2	1.1071	8.34558	9.48677e-08	5.61245e-07
Plekhj1	1.10592	5.40945	0.000700955	0.00153355
Rnf123	1.10588	7.83411	1.0178e-07	5.95364e-07
Aup1	1.10486	4.78173	0.00196062	0.00389782
1810046K07Rik	1.10483	6.14212	0.00137024	0.00280041
1810008B01Rik	1.10445	7.69557	1.43891e-07	8.03277e-07
Gm17103	1.10227	7.39651	3.45575e-06	1.347e-05
Rabepk	1.10176	4.14122	0.018846	0.0300884
Dek	1.10004	5.01622	0.00206671	0.00409306
Glmp	1.09872	3.88017	0.0161623	0.0262062
Serbp1	1.09539	5.94472	0.00178738	0.00358223
Ash2l	1.09362	3.66621	0.020281	0.0321246
Rplp1	1.09324	5.6069	0.000977883	0.00206447
Oga	1.09033	4.70455	0.00345609	0.00651287
Ccnl2	1.08883	4.447	0.00840131	0.0144803
Yipf2	1.08704	9.29788	4.09088e-09	3.46517e-08
Sco2	1.08577	7.09185	8.30676e-06	2.85992e-05
Tinf2	1.08527	9.27253	1.36263e-09	1.33032e-08
E230015B07Rik	1.07986	4.55356	0.00482118	0.00878672
Gm48141	1.07953	5.60274	0.000441523	0.00101397
Scpep1os	1.07756	8.79007	3.98014e-09	3.40738e-08
E130218I03Rik	1.07572	9.49277	2.99568e-08	2.05594e-07
Hsp90ab1	1.07548	7.9136	0.00025961	0.000632153
Thoc1	1.07421	7.0628	4.9148e-06	1.81212e-05
Gm15672	1.07232	6.95404	6.34903e-06	2.26269e-05
Gm17029	1.07186	9.26858	3.30033e-09	2.90192e-08
Gm48860	1.06816	5.39957	0.000608294	0.00135289
Btf3	1.06795	5.45981	0.0034855	0.00656531
Sycp3	1.06678	4.74175	0.00397318	0.00738358
Tmem88	1.06612	8.13705	5.92313e-08	3.72389e-07
Gm16163	1.0652	7.04531	2.52574e-06	1.01298e-05
Gm15788	1.06412	5.23076	0.00103537	0.00216932
Entr1	1.06289	5.11697	0.0039493	0.00734905
Mtf1	1.06099	6.97728	1.2264e-05	4.08047e-05
Mypop	1.06006	6.96631	3.60883e-06	1.40141e-05
Rpl27a	1.05851	6.45345	1.73107e-05	5.56376e-05
1700027A07Rik	1.05796	5.84154	0.000436575	0.00100427
Gm11537	1.05773	8.85439	4.3583e-08	2.88175e-07
Ppp1cc	1.05753	4.09698	0.0124304	0.0206133
Mbd3	1.05686	4.14046	0.0216761	0.034161
Thumpd3	1.05624	4.444	0.00742036	0.0129506
Gm17590	1.05583	5.6943	0.00190718	0.00380247
Ctdnep1	1.05495	5.29862	0.000848265	0.00181759
Rad54l	1.05345	5.81158	0.000315865	0.000753926
Ccdc73	1.05311	7.81078	2.90799e-07	1.49285e-06
Pspc1	1.04768	4.29549	0.0246856	0.0384091
Hnrnpm	1.04754	5.75282	0.000541952	0.00121639
Polr3h	1.04419	7.86595	2.44166e-07	1.27774e-06
Wdr38	1.04112	4.7277	0.0117327	0.0196086
Gm42670	1.03803	8.31034	1.89658e-07	1.01779e-06
Ankrd42	1.03747	6.35452	3.16942e-05	9.61461e-05
Gm29773	1.03577	6.82243	7.71732e-06	2.6814e-05
Dhx32	1.03537	7.48303	3.95492e-06	1.5049e-05
Nif3l1	1.03461	9.27822	2.94966e-07	1.50894e-06
Mpnd	1.03356	5.18559	0.00367861	0.00688229
Gm50256	1.03343	5.23877	0.00140237	0.00286325
Cenpo	1.03194	8.21091	6.9805e-07	3.2054e-06
Lsmem2	1.0312	7.91433	2.34688e-06	9.46719e-06
Dvl1	1.02504	4.94312	0.00300298	0.00574225
4930556J24Rik	1.02427	9.81589	1.7126e-08	1.26289e-07
Map3k15	1.0233	9.91406	2.83849e-10	3.55581e-09
Gm11583	1.02302	9.88894	1.21012e-09	1.21275e-08
Gm45133	1.02297	8.48958	9.44494e-08	5.59565e-07
Srsf4	1.02166	5.94121	0.000260676	0.000634008
Gm16033	1.02043	8.37031	9.70731e-08	5.73476e-07
Fuz	1.0202	8.17765	1.6351e-07	8.93612e-07
B230334C09Rik	1.01995	5.48258	0.0006662	0.00146367
Plppr3	1.01894	11.3037	2.4785e-10	3.18151e-09
Dnm2	1.01812	5.74091	0.00047321	0.00107958
Rmi1	1.01811	10.0293	5.91477e-10	6.66653e-09
Hcfc1r1	1.01736	8.11947	2.96979e-07	1.51736e-06
Mrpl19	1.01537	7.38861	1.14067e-06	4.97278e-06
Doc2a	1.01324	9.64034	3.93564e-09	3.38189e-08
Lrwd1	1.01196	8.48122	4.23733e-08	2.81518e-07
Rbbp6	1.01116	6.05991	0.00056119	0.00125754
Gm43737	1.00841	9.21574	7.61683e-08	4.61784e-07
Atp1b1	1.00678	5.41245	0.00102012	0.00213953
Gm34882	1.00578	6.33354	0.00023667	0.00058206
Smyd5	1.00465	4.85895	0.00522005	0.00943511
Psd	1.00015	11.1476	1.24142e-09	1.24034e-08
Gm20692	-1.00106	4.34123	0.0179171	0.0288156
Dcaf15	-1.00313	4.91834	0.0052816	0.00953393
Gm16206	-1.00366	6.9604	1.02572e-05	3.47108e-05
Dnajb12	-1.00499	6.17643	0.00168025	0.00338574
Gm18329	-1.00572	4.63954	0.0155376	0.025282
Wnk4	-1.0083	4.33877	0.0130444	0.0215455
Gm37939	-1.01231	8.16566	2.90063e-07	1.49231e-06
Gm50431	-1.01385	4.51598	0.00941845	0.0160802
Zbtb11os1	-1.01571	7.43732	2.7151e-05	8.37071e-05
Cog5	-1.01716	7.29918	2.11131e-06	8.61723e-06
Pgls	-1.01754	4.44159	0.019785	0.0314307
2810039B14Rik	-1.01911	3.69793	0.024321	0.0378984
Fanca	-1.01964	8.54687	6.51433e-08	4.03171e-07
Bet1l	-1.02035	6.31086	0.000399633	0.000930093
Gm10638	-1.02079	6.12228	0.00016954	0.000430213
Nsd1	-1.02975	4.63568	0.0122176	0.0203171
Pnrc1	-1.03199	4.47108	0.00895053	0.015357
Gm10524	-1.03468	5.19613	0.00225647	0.00443301
Gm16618	-1.03562	4.75901	0.0113698	0.0190674
Zfp974	-1.03779	4.62766	0.00929004	0.0158979
Ecsit	-1.03942	5.57605	0.000851652	0.00182297
Mphosph8	-1.03991	6.29473	9.65435e-05	0.00026073
Sirt3	-1.0441	4.38519	0.0128582	0.0212634
Fam228a	-1.04587	7.26504	9.12655e-06	3.11637e-05
Gm26879	-1.04681	8.37116	5.51335e-08	3.51149e-07
Fbxl17	-1.0472	4.48726	0.0125947	0.020869
Tas1r3	-1.04803	4.83035	0.00486795	0.00886359
Ptpn6	-1.05175	4.40046	0.0227036	0.0356184
Sqle	-1.05176	5.18158	0.00317385	0.00603844
Pitpnm1	-1.05216	5.73824	0.00365739	0.00684876
Ppp2r5a	-1.05225	5.70954	0.00106578	0.0022252
Ryr1	-1.05567	5.8372	0.000518994	0.00116928
1700019L13Rik	-1.05603	6.45279	3.05076e-05	9.30895e-05
Usp24	-1.05612	3.8367	0.0294134	0.0448096
Pwwp2a	-1.05636	3.63049	0.0234095	0.0365603
Gm43338	-1.05658	3.53313	0.0247254	0.0384566
Gm15738	-1.05812	5.43615	0.0036559	0.00684876
Cryzl1	-1.05851	4.25861	0.0128417	0.0212445
Gm32401	-1.05939	8.37776	6.16671e-08	3.84518e-07
H2-Aa	-1.05983	5.37748	0.00670064	0.0118235
Gm39326	-1.06168	6.93775	1.85851e-05	5.92303e-05
Tox4	-1.06207	8.38525	6.33405e-07	2.94339e-06
Cyp2t4	-1.06207	5.9383	0.000276674	0.000667838
Naa60	-1.06217	3.79821	0.0245897	0.0383029
Taf6l	-1.06255	3.82336	0.0204756	0.0323787
Gm44226	-1.06445	8.33784	8.718e-07	3.91273e-06
Atl3	-1.06488	3.48396	0.0247391	0.0384635
Eif4h	-1.06525	3.55519	0.0248249	0.0385681
Slc31a2	-1.06625	5.78947	0.000877123	0.00186787
Akap8l	-1.06775	3.92573	0.0168014	0.0271684
Rnf207	-1.06943	4.37815	0.0104563	0.0176708
Gm30054	-1.07245	6.70352	1.43339e-05	4.69038e-05
Kdm6bos	-1.07573	7.13624	6.61839e-06	2.34463e-05
Gm49886	-1.07696	4.0572	0.0148971	0.0243064
Slc38a2	-1.07734	3.89189	0.0291196	0.0444434
Zrsr2	-1.07868	4.88498	0.00711304	0.0124823
A730061H03Rik	-1.07971	6.85898	7.96347e-06	2.75541e-05
Psip1	-1.07972	7.09182	0.000138733	0.000359049
Polg2	-1.08558	4.65107	0.00617812	0.0109854
Gm16042	-1.08768	9.83511	2.56777e-10	3.26586e-09
Slc26a10	-1.08805	11.5618	6.34521e-12	1.57082e-10
Dexi	-1.08833	10.5459	1.5407e-11	3.26926e-10
Arhgap15os	-1.08942	7.57119	4.2949e-06	1.61651e-05
Serinc4	-1.09015	9.70489	5.21147e-10	6.00402e-09
Son	-1.09138	7.16085	1.0682e-05	3.60604e-05
9330175E14Rik	-1.09769	4.92977	0.00285687	0.00549824
Mindy1	-1.09816	5.77773	0.000643421	0.00142264
Heca	-1.10018	3.69431	0.0168407	0.0272108
Kdm2b	-1.10228	5.45607	0.000996305	0.00209698
Man2a1	-1.10346	5.06885	0.0013145	0.00269178
Nlrc3	-1.10388	4.9104	0.00476473	0.00870291
Naa35	-1.10596	6.69398	2.31017e-05	7.22948e-05
Donson	-1.10969	4.60636	0.00945048	0.0161282
Gm17968	-1.10996	4.70812	0.00385229	0.00719106
E130116L18Rik	-1.11127	6.49173	1.26378e-05	4.18811e-05
Gm12276	-1.11155	3.8792	0.0252543	0.0391329
Gm44141	-1.11225	4.32683	0.0128744	0.0212816
Dynlt1a	-1.11316	3.652	0.016964	0.0273781
Gm37655	-1.11483	5.08737	0.00176424	0.00353783
Rell2	-1.1153	7.2931	7.25791e-06	2.54302e-05
Mis18bp1	-1.1162	4.51968	0.0053196	0.0095942
Hexim1	-1.11891	4.43788	0.0162043	0.0262642
Gm48283	-1.11909	8.13457	1.15307e-07	6.59646e-07
Tnk2os	-1.12085	8.14778	1.83128e-08	1.33854e-07
Chd7	-1.12413	3.62059	0.0160994	0.0261245
Rab1a	-1.12714	6.11402	7.31943e-05	0.000203214
Ctcf	-1.12954	5.30107	0.00215298	0.00424573
Gm37768	-1.12997	5.24027	0.00101769	0.0021355
Pkd2l2	-1.13043	8.75238	2.60678e-09	2.35687e-08
Gm16573	-1.13057	8.25396	6.4166e-08	3.97714e-07
Prss53	-1.13084	5.91317	0.000107979	0.000287323
Bcl2l13	-1.13116	5.09893	0.00117078	0.00242857
Ncor1	-1.13181	6.83119	3.789e-06	1.45777e-05
Pik3c2a	-1.13377	4.60279	0.00422195	0.00781098
Gm49801	-1.13435	4.57476	0.0089339	0.0153348
Dgkd	-1.13536	4.51964	0.0231425	0.0362113
Gm10762	-1.13564	5.41025	0.00108204	0.00225575
Dstyk	-1.13602	3.73586	0.0156529	0.0254398
Gm50019	-1.13621	4.20544	0.0285772	0.043728
Nek11	-1.13914	5.00161	0.00173391	0.00348374
Gm48900	-1.13983	6.26931	0.000165273	0.000420924
Msn	-1.14137	5.20251	0.00643654	0.0114107
Glud1	-1.1424	3.6112	0.0248604	0.0385947
Gm44140	-1.15278	6.04441	7.17412e-05	0.000199981
Rfx1	-1.15482	3.58616	0.0331381	0.0499533
A630072L19Rik	-1.15573	9.72878	7.09492e-11	1.09991e-09
Pspn	-1.15585	3.43232	0.0169217	0.0273204
Ier5	-1.15768	4.97697	0.0057515	0.0102972
A130010J15Rik	-1.15783	8.83074	1.72386e-08	1.26895e-07
Bcl9l	-1.15994	8.18612	2.09054e-08	1.49906e-07
Rabep2	-1.16101	5.05221	0.00333246	0.00630846
Bsn	-1.16162	5.31983	0.0017432	0.00349903
D530033B14Rik	-1.16208	5.76972	0.000153545	0.00039395
Itpr3os	-1.16456	9.06426	6.69484e-10	7.42502e-09
D630008O14Rik	-1.16555	8.65058	1.13008e-08	8.52996e-08
Gm15978	-1.16679	8.08015	2.17185e-08	1.55201e-07
Asf1a	-1.1672	5.63087	0.000236546	0.00058206
Gm50315	-1.17083	8.27296	2.71157e-08	1.88902e-07
Mepce	-1.17333	3.73982	0.0121358	0.0202134
Gm45051	-1.17888	7.95936	2.86088e-08	1.96993e-07
Gm15976	-1.17955	4.02378	0.0154481	0.0251463
Dock11	-1.18168	4.17697	0.0200305	0.0317966
4732487G21Rik	-1.18252	8.29144	3.28139e-08	2.23726e-07
Selenot	-1.18592	3.84266	0.0150097	0.0244805
Mrgbp	-1.18606	4.25566	0.0103949	0.0175813
Vps9d1	-1.1863	5.71572	0.000208459	0.000520534
Gm29477	-1.18641	7.62936	8.94965e-07	3.98945e-06
C920021L13Rik	-1.18907	8.60021	1.92616e-08	1.39806e-07
1700120B22Rik	-1.18973	8.34824	6.19117e-08	3.85465e-07
Cep57	-1.18998	5.11666	0.000891834	0.00189532
Sp140	-1.19159	5.22703	0.00210466	0.00415834
Pdzd8	-1.19251	4.52979	0.00729113	0.0127465
C730034F03Rik	-1.19253	7.79718	5.93911e-08	3.7256e-07
Nudt19	-1.19296	4.19967	0.00674433	0.0118854
Pip4k2a	-1.19305	3.6034	0.0219287	0.0345069
Amt	-1.19432	5.33699	0.000407886	0.000945595
Tmem208	-1.20047	6.47958	2.62627e-05	8.10889e-05
Ino80	-1.20144	3.61051	0.0122996	0.0204289
Gm47641	-1.20269	4.85376	0.00335734	0.0063469
Elk3	-1.20287	4.63112	0.00226837	0.00445428
Gm20402	-1.2044	10.2462	7.25282e-12	1.73359e-10
Kpna2-ps	-1.20594	7.09268	5.19589e-06	1.8975e-05
Eif2d	-1.21163	8.48105	1.09343e-08	8.2834e-08
Gm15747	-1.21269	7.13785	8.66768e-07	3.89718e-06
Arhgap27os2	-1.2144	4.72655	0.00280228	0.00540319
Gm9856	-1.21508	5.74116	0.000236172	0.00058155
Crybg1	-1.21659	5.92828	7.04596e-05	0.000196936
Lrig1	-1.21715	3.61884	0.0126815	0.0210046
Wdr33	-1.22383	5.58982	0.000503376	0.00114009
Pex1	-1.22525	6.89962	8.86125e-06	3.03575e-05
Gm15777	-1.22682	6.76726	6.60814e-06	2.34299e-05
Cdk13	-1.22785	6.94824	1.99253e-06	8.22934e-06
Fgf2	-1.2285	7.39307	2.41564e-07	1.27173e-06
Snx5	-1.22899	4.33431	0.00910928	0.01561
Gm44040	-1.23102	7.13922	2.78501e-06	1.10418e-05
Gm9768	-1.23114	7.40512	1.11469e-07	6.42104e-07
Gimap6	-1.23199	5.05233	0.00266325	0.00516144
Tesk1	-1.23413	10.2377	1.61532e-11	3.41022e-10
Gm42928	-1.23586	9.60745	5.3086e-11	8.83139e-10
Gm44941	-1.2359	4.7127	0.00263562	0.00511028
Ywhaz	-1.23667	4.23271	0.00445806	0.00819313
Galnt6os	-1.23705	7.64363	1.00792e-07	5.92083e-07
Fam98c	-1.24305	4.17914	0.00765019	0.0133126
Gm26891	-1.24475	4.52167	0.00320155	0.0060828
Traf3ip2	-1.24524	6.79222	2.39831e-06	9.65591e-06
Clic3	-1.24752	6.18188	4.10375e-05	0.00012165
N4bp2os	-1.2495	3.62735	0.014375	0.0235377
Rgp1	-1.25066	6.27603	6.69462e-05	0.000188255
Adgra2	-1.25142	4.35193	0.0062569	0.011116
Slc23a1	-1.25213	4.90531	0.00107882	0.00225016
Nelfb	-1.25254	4.64706	0.00197424	0.00392302
Cd79b	-1.25307	5.44393	0.000957505	0.0020266
Gm6934	-1.25424	6.08796	0.00017928	0.000452992
Gm49163	-1.25517	3.70187	0.0161063	0.0261256
Pax5	-1.25572	6.16015	1.1767e-05	3.92769e-05
Gm48008	-1.25931	3.79623	0.00786161	0.0136704
Raf1	-1.26014	6.69136	2.74839e-06	1.09383e-05
Kat5	-1.26175	6.05524	0.000131616	0.000342762
Man2a2	-1.26414	4.64829	0.00230837	0.00452642
Gm37127	-1.26463	6.60309	5.29987e-06	1.92508e-05
Igf2bp3	-1.26536	4.67409	0.00180617	0.00361669
Pcnx3	-1.26541	5.12202	0.00034242	0.000809162
Serp1	-1.26647	5.77896	0.000318072	0.000757653
Aen	-1.27088	4.35928	0.00420519	0.00778344
Gm13204	-1.27427	5.75296	4.06828e-05	0.000120857
A230072E10Rik	-1.27552	5.945	5.05088e-05	0.000146286
Kcnb1	-1.27575	7.10347	1.57219e-06	6.63157e-06
Ppp1ca	-1.27783	6.98255	5.61965e-06	2.02883e-05
Ctbs	-1.28055	3.65776	0.00704685	0.0123766
Asap2	-1.28173	5.66777	0.000107969	0.000287323
Zbtb32	-1.28251	3.47698	0.0073346	0.0128117
Star	-1.28409	6.13486	0.00017089	0.00043311
Smg1	-1.28506	3.32011	0.00935467	0.015991
Gm49085	-1.28533	6.82023	1.32954e-06	5.71234e-06
Gm20531	-1.28618	11.5853	2.59407e-13	1.21222e-11
Anxa9	-1.28664	4.32433	0.00458534	0.00840476
Sipa1	-1.28667	4.22929	0.00428847	0.00792198
Gm43660	-1.2912	6.61884	4.3323e-06	1.62618e-05
4732471J01Rik	-1.29391	8.71394	1.11175e-08	8.40689e-08
Gm29439	-1.29761	12.4707	1.44994e-14	1.23067e-12
Gm49864	-1.29779	5.83925	8.8704e-05	0.000240967
Pptc7	-1.29918	5.17182	0.00050175	0.00113734
Ada	-1.29986	4.17179	0.00337604	0.00637355
Gm16599	-1.30056	6.47975	8.47368e-06	2.91016e-05
Tbl3	-1.30129	5.39948	0.000387633	0.000904695
Cd79a	-1.30161	5.3835	0.00310944	0.00593491
Mideas	-1.30205	4.14094	0.00297186	0.00569825
Leng9	-1.30243	8.38664	2.61996e-08	1.83751e-07
D830024N08Rik	-1.30317	4.44345	0.00489926	0.0089095
Bak1	-1.30329	3.60568	0.00834042	0.0143873
B630019A10Rik	-1.30418	6.03983	0.000216488	0.00053818
Med13	-1.30456	4.70826	0.00334545	0.00632729
4833422C13Rik	-1.30582	3.92821	0.00499569	0.00907295
Grb7	-1.306	5.57104	0.000150467	0.000386768
Proz	-1.30747	6.89895	6.97123e-06	2.45222e-05
Gm16239	-1.31084	3.47404	0.0168288	0.0272021
Map3k3	-1.31167	6.22588	4.09964e-05	0.000121615
Ankle2	-1.31373	4.82422	0.00158582	0.00321414
BC051537	-1.31539	10.6998	2.1683e-12	6.44139e-11
Gm44101	-1.31625	7.73702	2.64008e-08	1.8485e-07
H3f3aos	-1.31695	4.52713	0.00284381	0.00548073
Slc35a4	-1.31839	5.78675	0.000181466	0.000457958
Atrip	-1.31862	5.17527	0.00129813	0.00265956
Smarcd1	-1.31984	4.01934	0.00403548	0.00748932
Gm16575	-1.32255	8.91776	2.1481e-10	2.81795e-09
Gm37376	-1.32626	10.8648	4.37529e-11	7.51309e-10
Gm12869	-1.32729	3.97749	0.00361778	0.00678987
Cmah	-1.32946	4.9824	0.00112132	0.00233295
Gga1	-1.33084	4.11239	0.00855991	0.0147191
Stat6	-1.33237	4.69939	0.00144318	0.00294515
Gna13	-1.33287	4.57511	0.00332563	0.00629841
Bbip1	-1.33329	4.10316	0.00598944	0.010691
Tgfbr2	-1.3369	3.71316	0.010559	0.017837
Sulf2	-1.33818	6.30905	4.96853e-06	1.8303e-05
E130307A14Rik	-1.34206	8.35914	5.53655e-09	4.50617e-08
Bptf	-1.34556	3.7577	0.00878797	0.0150905
Gm17137	-1.34577	3.39961	0.0103939	0.0175813
Ythdc2	-1.35334	4.88564	0.00116541	0.00241863
Hnrnpk	-1.35443	6.87322	4.32116e-07	2.0946e-06
Ddx54	-1.35458	5.62039	8.97899e-05	0.000243757
Itpkc	-1.35711	3.67262	0.00630052	0.0111839
Opn3	-1.35986	5.98099	5.45448e-05	0.000156342
Sgf29	-1.36839	5.07507	0.000509221	0.00114913
Scd1	-1.3691	5.63503	0.000298496	0.000715942
Tssk6	-1.37022	6.18897	8.07466e-05	0.000221667
Lgals8	-1.37277	4.14566	0.0067864	0.0119545
Gm14508	-1.37826	4.21376	0.00816809	0.0141252
Gli1	-1.37844	5.84905	3.49062e-05	0.000105047
Mir6357	-1.37992	5.82479	0.000320015	0.000761544
Gm14966	-1.38443	6.05441	6.54051e-05	0.000184171
Gbp9	-1.38522	3.81018	0.00438669	0.00807267
Gins2	-1.3865	9.66948	1.02481e-10	1.50077e-09
Gm42585	-1.38678	6.71906	5.24312e-07	2.49784e-06
Med22	-1.38684	3.25679	0.0131108	0.0216467
Tdo2	-1.38764	4.40868	0.00398119	0.00739516
Setd2	-1.39144	3.7072	0.012174	0.0202556
Gm10832	-1.39301	3.96768	0.00311567	0.00594134
Gm15886	-1.39537	9.61994	1.02281e-11	2.36325e-10
1700099I09Rik	-1.40016	5.76602	1.72682e-05	5.55442e-05
Rabgap1	-1.40121	3.58714	0.00434369	0.00800416
Gm17039	-1.40274	7.26536	1.62104e-07	8.87094e-07
Gm26513	-1.40282	5.71091	3.66985e-05	0.000109963
Preb	-1.4042	7.74151	4.60214e-08	3.00476e-07
Gm36043	-1.40427	8.44896	4.81575e-10	5.64188e-09
Gm16731	-1.40435	8.75314	7.15737e-11	1.1025e-09
Mir6385	-1.40496	5.43084	0.000105294	0.00028162
Gm11521	-1.4057	5.58072	3.1093e-05	9.4529e-05
4933430L12Rik	-1.40785	6.97958	5.17032e-06	1.89124e-05
Ero1b	-1.40927	5.6825	7.71331e-05	0.000212589
B230319C09Rik	-1.41429	3.3854	0.0047323	0.00865507
Gm15477	-1.41509	5.69664	2.87604e-05	8.80815e-05
Mcmbp	-1.4155	3.8029	0.00333448	0.00630942
1700034H15Rik	-1.41746	6.40705	5.80408e-06	2.08456e-05
Arhgef1	-1.41761	3.72776	0.00476163	0.00870105
Ncf1	-1.41921	3.98501	0.00480221	0.00875599
Dtymk	-1.41939	3.77884	0.00515344	0.00932688
Gm38058	-1.42135	5.32157	9.25289e-05	0.000250702
Gramd4	-1.42168	6.09069	1.58544e-05	5.16355e-05
Cherp	-1.42248	4.87952	0.000648683	0.00143047
Carhsp1	-1.42329	5.57248	8.78603e-05	0.000238987
Ttpal	-1.42824	5.14799	0.000210477	0.000524805
Lrrc51	-1.42889	5.76451	0.00672869	0.0118629
Ghrl	-1.42964	4.36026	0.00181875	0.00363487
Iqgap1	-1.43011	3.88117	0.00648114	0.01148
Etohd2	-1.43056	9.2687	3.09831e-11	5.67659e-10
Mvd	-1.43639	5.44546	3.32675e-05	0.000100552
Cse1l	-1.44279	4.7086	0.000968345	0.00204746
Tor4a	-1.44376	6.53402	1.07101e-05	3.60966e-05
Gm37850	-1.44454	4.44294	0.0023226	0.00454787
Msl1	-1.44484	4.41904	0.00163318	0.00330049
Gm12319	-1.44492	5.92089	8.07686e-06	2.79232e-05
Gngt2	-1.44507	7.08402	1.3856e-06	5.9226e-06
Spag9	-1.44658	3.3471	0.0119644	0.0199599
Clec2i	-1.45028	3.40947	0.00388298	0.00724185
Gm17022	-1.45202	4.97296	0.00082987	0.00178368
Gm6293	-1.45231	5.85012	2.19282e-05	6.91428e-05
4930562C15Rik	-1.45307	3.60165	0.00356967	0.00670563
Zeb2	-1.45378	5.41625	0.000843334	0.00180888
Malat1	-1.45574	4.75176	0.00151489	0.00307789
Gm38162	-1.45738	5.00955	0.000134544	0.000349294
Brpf3	-1.45877	3.78086	0.00752664	0.0131141
Gm47827	-1.45978	5.49296	0.000864828	0.00184642
Zfp473	-1.46002	4.54256	0.00665073	0.0117404
Gm43379	-1.46007	4.25587	0.00235843	0.0046137
Gm49911	-1.46365	4.59998	0.00165604	0.0033418
6330409D20Rik	-1.46525	7.55768	4.67908e-08	3.04067e-07
1700016A09Rik	-1.46693	5.30431	0.000111856	0.000296626
Atg16l2	-1.46866	6.37213	1.20151e-05	4.00406e-05
A930037H05Rik	-1.4708	8.91874	2.93129e-11	5.48227e-10
Gmpr2	-1.47153	8.38041	2.94292e-10	3.65361e-09
Ubtf	-1.47272	5.6581	2.43753e-05	7.58809e-05
Tspan32os	-1.47984	6.45666	5.49644e-07	2.60955e-06
Gm10916	-1.48008	3.69829	0.0136618	0.0224939
Gm37564	-1.48206	5.00541	0.000282383	0.000681224
Slc22a23	-1.48258	3.58595	0.00818869	0.0141549
Ablim1	-1.48711	3.85835	0.0024837	0.00484508
Zfp668	-1.49157	8.14293	3.30007e-09	2.90192e-08
Zfp85os	-1.49196	3.79662	0.00162387	0.00328326
Gm45355	-1.49695	4.84522	0.000328	0.000778626
Ripor1	-1.50028	4.42511	0.00507201	0.0091955
Tmem33	-1.5044	3.41297	0.0042501	0.00785957
Smg7	-1.50467	5.23228	0.000181577	0.000457962
Stk10	-1.50556	3.43324	0.00372942	0.00697109
Fbxw2	-1.50561	5.85268	2.91988e-05	8.92924e-05
Sptbn5	-1.50712	6.36155	1.09673e-06	4.81152e-06
Ccni	-1.50743	4.17668	0.0116289	0.019447
Fbxo24	-1.50975	5.95901	4.5625e-06	1.70336e-05
Ccdc157	-1.51181	4.33139	0.0029842	0.00571652
Zfp236	-1.51188	4.43457	0.000989849	0.0020875
Fchsd2	-1.5127	5.42951	0.000297462	0.000714698
Gm15893	-1.51483	4.36926	0.0016193	0.00327561
Cap1	-1.51749	7.26466	1.55459e-07	8.56362e-07
Abr	-1.52164	4.27243	0.000731492	0.00159115
Rarres2	-1.52171	8.05428	1.5073e-09	1.45112e-08
Zfp865	-1.52247	5.67574	4.68225e-05	0.00013663
Gm26782	-1.52422	4.61084	0.000619322	0.00137395
Gnl1	-1.52665	5.40417	5.06446e-05	0.000146577
Abhd11os	-1.53425	4.82485	0.000308018	0.000737506
Leng8	-1.53659	4.94683	0.000377339	0.000882154
St7l	-1.54143	7.12139	3.24417e-08	2.21551e-07
4930458D05Rik	-1.5432	5.73898	6.10154e-06	2.1801e-05
Kat6a	-1.54518	4.00051	0.0012942	0.00265282
Btla	-1.54588	4.45712	0.00213553	0.00421331
Mier1	-1.54798	3.6293	0.00263068	0.00510577
Trim65	-1.54961	3.77407	0.00229219	0.00449681
Commd1	-1.55121	7.07028	4.17684e-08	2.78682e-07
Gm15122	-1.55453	5.79407	6.98106e-06	2.45222e-05
Setx	-1.55511	3.31414	0.0059183	0.0105731
Gm12265	-1.56192	5.62282	4.32165e-05	0.000127655
Gm16093	-1.56409	7.77436	1.31687e-09	1.29476e-08
Dazap2	-1.57435	3.97624	0.00091366	0.00193873
Gm13477	-1.57574	4.03899	0.00181618	0.00363149
Pold1	-1.58172	4.45973	0.000637754	0.00141086
Zfp335	-1.58181	8.95942	4.93795e-12	1.26055e-10
Flicr	-1.5825	4.8784	0.000118683	0.000312407
Gm29585	-1.58625	10.8337	4.22606e-14	2.83487e-12
Fxr1	-1.58645	5.05711	0.000171559	0.00043454
Tmem67	-1.58757	4.91081	0.000266866	0.000647547
Gm5711	-1.58848	3.98178	0.000939854	0.00199025
Eml3	-1.59122	7.05543	1.86081e-07	9.99887e-07
H2-Q4	-1.59667	6.38494	7.76075e-07	3.51886e-06
Gm9967	-1.60602	3.12294	0.00410179	0.00760898
Mylpf	-1.6136	5.29301	7.52942e-05	0.000208072
Apobec2	-1.61494	4.18406	0.00276835	0.00535266
Wrap73	-1.61533	4.64389	0.000208514	0.000520534
Ccdc71l	-1.61554	4.52113	0.000513355	0.00115721
Card14	-1.62033	8.27022	1.17953e-10	1.70336e-09
Slc35e2	-1.62394	6.91863	5.52812e-07	2.61862e-06
Mrpl24	-1.6262	6.36985	3.6918e-07	1.83443e-06
Gm43962	-1.6297	3.6714	0.00696098	0.0122361
Trio	-1.63407	4.7233	0.000309285	0.000740114
Gm41077	-1.63715	4.66059	0.000427404	0.00098535
Gm37270	-1.63734	7.295	4.90665e-09	4.06509e-08
Gm43474	-1.639	8.96443	3.57143e-10	4.3179e-09
Gm44987	-1.6421	9.43487	9.31794e-13	3.25658e-11
Dennd4b	-1.64348	3.26172	0.00790688	0.0137363
Prkcz2	-1.64403	6.2662	4.16574e-07	2.02873e-06
Diaph1	-1.64486	3.66125	0.00148569	0.00302595
Ccdc66	-1.64506	8.50823	1.78064e-10	2.44412e-09
Gm14048	-1.64546	5.03802	8.00007e-05	0.000219909
Otub2	-1.64756	5.07254	0.000168105	0.000427352
Gm20275	-1.65094	4.17251	0.000938245	0.00198786
Gm38118	-1.65466	4.93967	0.000116244	0.000306181
Abcb10	-1.65907	5.17657	0.000525166	0.00118255
Cd37	-1.66581	4.37445	0.000336531	0.000796603
Btbd6	-1.66656	5.08946	7.96296e-05	0.000219034
Prc1	-1.66732	4.82649	6.17412e-05	0.000175158
Uba6	-1.66986	5.42778	2.85986e-05	8.7715e-05
Brd7	-1.67522	4.61272	0.000507473	0.00114643
Smad2	-1.67785	3.51468	0.00149901	0.00304859
Gm41442	-1.67939	5.19807	7.11945e-05	0.000198723
Prox2	-1.67995	4.47761	0.000179776	0.00045397
A830052D11Rik	-1.68225	7.89286	4.75487e-10	5.5863e-09
Gm15494	-1.6847	5.85912	0.00071734	0.00156282
Gm2011	-1.68997	3.14123	0.0015756	0.00319498
Sting1	-1.69308	4.2612	0.000247029	0.000603763
Gm36956	-1.6932	4.65502	0.000770129	0.00166561
Cd72	-1.69729	9.37898	7.20345e-12	1.73174e-10
Erap1	-1.69747	7.69402	4.23797e-10	5.02157e-09
Gm44199	-1.69765	6.09432	1.17134e-06	5.09051e-06
Gpr137b-ps	-1.69773	6.13192	9.65958e-07	4.28296e-06
Msl2	-1.70757	3.17821	0.00231421	0.00453571
N4bp2	-1.7088	3.90523	0.00183887	0.0036698
Smim5	-1.70949	5.21056	2.31265e-05	7.23182e-05
Rufy2	-1.70972	3.28813	0.00293194	0.0056297
Api5	-1.71032	5.99985	1.13384e-05	3.80294e-05
Cd180	-1.71449	5.49804	6.55194e-06	2.32505e-05
Gm10209	-1.71465	6.06098	3.98446e-07	1.94957e-06
Gabpb1	-1.7199	4.88187	6.2021e-05	0.000175712
Zfp445	-1.72003	3.54703	0.00261728	0.0050842
Xpo7	-1.72329	4.14941	0.000623769	0.00138287
Arsa	-1.73099	4.80387	9.85141e-05	0.000265363
Tgif2	-1.73317	6.4562	8.72108e-07	3.91273e-06
Tut7	-1.73331	3.55323	0.000696836	0.00152614
Fam120c	-1.73349	4.26851	0.000282883	0.000682034
Gp1ba	-1.73554	5.27197	0.000125214	0.000327113
Ciita	-1.73776	3.39877	0.00292143	0.00561211
Resf1	-1.74152	3.40994	0.0012904	0.00264634
Ifi30	-1.74336	5.70074	3.70508e-06	1.4321e-05
Gm28370	-1.74844	6.29338	6.97923e-06	2.45222e-05
Erbin	-1.75054	3.78565	0.00154381	0.00313511
Cep250	-1.75179	4.21391	0.000403994	0.000938664
Pik3r2	-1.75254	8.16672	5.75149e-11	9.38056e-10
Ebf1	-1.75422	3.73166	0.00117238	0.00243067
Zmym1	-1.75657	5.50772	1.66787e-05	5.38144e-05
Gfm2	-1.75811	9.23832	3.8857e-13	1.70112e-11
Flna	-1.75842	4.05398	0.00253588	0.00493298
Rangrf	-1.75913	4.09828	0.000247223	0.000603763
Gm48899	-1.76031	6.42647	3.50631e-07	1.75273e-06
Gm37362	-1.76046	3.99917	0.000570704	0.00127489
Fam114a1	-1.76372	3.44964	0.000724759	0.00157815
Prkcb	-1.76566	3.15563	0.00122957	0.00253659
Gm15819	-1.76887	5.92064	1.76887e-06	7.39228e-06
Pde8b	-1.77207	3.92925	0.000698867	0.00152978
Pou2f2	-1.77225	3.83103	0.000289894	0.000697725
Golgb1	-1.77271	4.26714	0.000334942	0.000793294
Gm9208	-1.7728	3.35142	0.00171106	0.00344115
Vwa7	-1.77361	5.36215	2.91041e-05	8.90684e-05
Appl2	-1.7747	3.225	0.00118511	0.0024534
Mppe1	-1.77488	3.72741	0.00294586	0.00565123
Pisd-ps1	-1.77773	4.70304	0.000763422	0.00165196
Zfp397	-1.77804	3.59453	0.000426089	0.000982865
Dus2	-1.77806	5.00224	0.000134303	0.000348886
Aff4	-1.77889	3.54049	0.0016647	0.00335765
Scn4a	-1.78053	3.22303	0.0120512	0.0200966
Arhgap45	-1.78109	3.47895	0.0011291	0.00234797
Zbtb7a	-1.78487	3.73665	0.000414707	0.000959269
Gm17334	-1.78547	9.29855	6.58938e-13	2.50468e-11
Orc1	-1.78594	3.47389	0.00050098	0.0011367
Dtx1	-1.79012	6.28435	1.46588e-07	8.15273e-07
Cdc42bpa	-1.79252	4.16407	0.000334319	0.00079227
Ago2	-1.7988	4.22552	0.000920213	0.00195164
Hdgfl3	-1.79983	9.21131	1.29925e-12	4.12488e-11
Cacnb4	-1.80128	5.14768	1.37057e-05	4.49897e-05
Zfp36l2	-1.80204	4.71409	0.000365426	0.000857705
2010016I18Rik	-1.80289	7.62724	1.67311e-10	2.31179e-09
Gm13331	-1.80451	5.60916	4.3171e-06	1.62273e-05
Tmc3	-1.80611	5.77563	5.43849e-06	1.96855e-05
Pcolce	-1.81145	5.01698	0.000370872	0.000868991
Cul5	-1.81202	5.38626	4.52298e-06	1.69164e-05
A930029G22Rik	-1.81295	5.8641	2.62368e-05	8.10691e-05
Ppp1r18	-1.81615	5.30951	5.66913e-06	2.04138e-05
Rarb	-1.8169	3.81818	0.000434273	0.00100008
Gnal	-1.81812	8.71944	2.39961e-12	6.91111e-11
Klf3	-1.81947	4.74558	0.000114014	0.000301453
Adcy5	-1.82004	3.25342	0.00125371	0.00257872
Tead2	-1.82934	7.67457	3.35155e-09	2.93454e-08
Epha1	-1.83328	3.80092	0.000290661	0.000698763
Insyn2b	-1.8376	4.10457	0.00049605	0.00112613
Dgka	-1.84101	3.53453	0.00029816	0.000715942
Tlnrd1	-1.84388	3.77934	0.000593338	0.00132174
Gm43604	-1.84488	4.47112	0.000201984	0.000505749
Gm26587	-1.84495	4.72034	0.000356555	0.000840286
Gm14137	-1.8468	4.42108	0.000162034	0.000413434
9530052E02Rik	-1.85192	6.04129	4.03393e-07	1.97146e-06
Anks3	-1.85242	4.98677	7.18804e-05	0.000200235
Iglv3	-1.85262	8.98535	9.56794e-13	3.31609e-11
Gm43172	-1.85795	3.20911	0.00170944	0.00343956
Fhod1	-1.86022	5.4186	4.42522e-06	1.65806e-05
Gm17315	-1.86595	5.41911	5.15178e-06	1.88611e-05
Gm19719	-1.87071	4.00425	0.000111903	0.000296626
Ep300	-1.87589	5.43848	2.29486e-05	7.19242e-05
Pus3	-1.878	5.64996	2.00605e-06	8.25777e-06
Pdzd4	-1.88063	4.85217	6.27414e-05	0.000177511
Tm9sf1	-1.885	3.54613	0.000776152	0.0016776
Gm43460	-1.888	5.39946	4.11305e-06	1.56078e-05
Heatr5a	-1.88906	5.12956	0.000213916	0.000532469
Gm26964	-1.88968	6.44468	6.1429e-08	3.83608e-07
Tm6sf1	-1.88992	3.08817	0.0101914	0.0172581
Dapp1	-1.89005	3.74473	0.000645833	0.00142722
Map11	-1.89393	4.53995	0.000122863	0.00032178
Gm37419	-1.89643	6.21388	1.20059e-07	6.81209e-07
Pmel	-1.89647	7.20238	3.51496e-09	3.05831e-08
A930015D03Rik	-1.89725	6.05494	8.80815e-07	3.93904e-06
Rbpjl	-1.90259	3.66361	0.000236798	0.00058206
2310044K18Rik	-1.90336	3.45779	0.00173883	0.00349194
Gm28402	-1.90442	4.10531	0.000106572	0.000284489
Tmem62	-1.90834	3.2745	0.000877062	0.00186787
Gm45235	-1.90851	5.11069	4.84741e-05	0.00014108
Rcbtb1	-1.90889	3.82423	0.000714605	0.00155849
Git2	-1.9091	2.80487	0.0181998	0.0292138
Gm16316	-1.91154	3.00012	0.000708823	0.00154913
Trim13	-1.91613	3.4336	0.000327354	0.000777535
Med14	-1.91748	3.51795	0.00163633	0.00330524
Gm33280	-1.92066	4.15582	0.000213935	0.000532469
Gm15943	-1.92134	5.5062	2.97195e-06	1.17382e-05
Fcgrt	-1.92324	3.29248	0.000862119	0.00184234
Cfap74	-1.92838	4.94338	1.23533e-05	4.09708e-05
Ccdc142os	-1.93033	7.11014	2.25711e-09	2.06314e-08
Kif22	-1.93292	4.36804	0.000160696	0.000410777
Nrbp1	-1.93573	4.96136	0.000114767	0.000302866
Cmtm7	-1.9454	3.37455	0.000339576	0.000802898
Malt1	-1.94693	3.6132	0.000570771	0.00127489
Map4k2	-1.94876	4.28865	0.00031792	0.000757653
9430025C20Rik	-1.94898	4.11288	0.00101383	0.00212956
4921511I17Rik	-1.95132	4.26875	0.000133189	0.000346424
Ccnb2-ps	-1.95565	6.26535	3.10118e-07	1.5729e-06
Gm45745	-1.95768	5.1657	2.73161e-05	8.41539e-05
Ccdc97	-1.96385	4.6593	6.00784e-05	0.000171024
Lmbrd1	-1.96405	4.47969	4.32481e-05	0.000127657
Gm43388	-1.96595	7.84668	5.36693e-10	6.11536e-09
Zfp740	-1.97337	5.25338	3.06923e-06	1.20766e-05
Inka2	-1.97354	3.68674	0.000169311	0.000429894
1700058P15Rik	-1.98155	7.12241	5.7366e-10	6.4833e-09
Nrm	-1.987	5.43672	1.39815e-06	5.97011e-06
Olfr99	-1.98857	6.25598	7.98536e-08	4.78546e-07
Lysmd1	-1.98895	4.23838	6.47531e-05	0.000182582
Gm15478	-1.99069	3.69939	0.000221551	0.000549124
Ighm	-1.99312	4.9433	0.000506304	0.00114503
Zmym5	-1.99876	2.88066	0.000492804	0.00111937
Sys1	-2.00519	3.53593	0.00759019	0.0132137
Chd2	-2.00519	3.7887	0.000736546	0.00160047
Lrrc75aos2	-2.01008	4.44962	5.5462e-05	0.000158861
Rom1	-2.01126	3.58537	0.000320072	0.000761544
Clec2g	-2.01224	5.29021	3.86087e-06	1.48405e-05
Ppp6r2	-2.01244	4.93434	1.32348e-05	4.3616e-05
Tatdn1	-2.01677	4.44268	7.94961e-05	0.000218842
Slc30a7	-2.02347	5.77671	4.31527e-07	2.09419e-06
Hdac5	-2.02424	4.20958	5.39885e-05	0.000155068
Rpe	-2.02564	4.93348	9.95227e-06	3.3789e-05
Glra4	-2.02601	3.28738	0.000232481	0.000574162
Ptpn18	-2.03001	5.98071	1.20865e-07	6.83915e-07
Mef2d	-2.03036	3.97659	0.000969534	0.00204789
Gm22573	-2.03311	3.06128	0.000531463	0.00119479
Smim6	-2.03409	4.99478	4.58669e-05	0.000134149
Zfp36	-2.04283	3.83321	0.000111113	0.000295096
Hnrnph1	-2.04406	5.88652	1.23071e-05	4.09155e-05
Gm26801	-2.04423	5.52196	2.47137e-06	9.93085e-06
Heatr1	-2.05497	3.46296	0.000186332	0.000469101
Nme7	-2.05628	3.64871	0.00044338	0.00101767
Hvcn1	-2.06483	7.86205	1.76498e-11	3.65202e-10
Zeb2os	-2.06483	3.79599	0.00050357	0.00114009
Gm12462	-2.07005	3.73924	0.000403266	0.000937499
Zbtb2	-2.07225	4.56416	3.16568e-05	9.61026e-05
Klf13	-2.07557	4.06769	0.000202283	0.000506193
Mga	-2.07576	3.47467	0.000365729	0.000857906
Sgpp2	-2.07579	7.45285	5.73256e-11	9.38056e-10
Gm46440	-2.08686	3.61127	8.85481e-05	0.0002407
Senp7	-2.09458	3.83025	0.000263342	0.000639742
Gm43592	-2.09779	3.79565	8.08347e-05	0.000221762
Gm13031	-2.09951	3.92691	0.000439345	0.00100952
Wnt2b	-2.09962	3.10105	0.000328715	0.000779878
Ak3	-2.10312	7.53091	2.50616e-10	3.19728e-09
Btg1	-2.1039	4.97385	1.79369e-05	5.7394e-05
Orm3	-2.10396	3.75129	0.00019577	0.000491077
Gm5901	-2.10672	4.76566	3.26599e-05	9.89312e-05
Trex1	-2.10775	4.84957	1.51652e-05	4.95071e-05
1700048M11Rik	-2.11025	4.11322	0.000121078	0.000317907
Gm17112	-2.11106	5.71818	3.02437e-07	1.54147e-06
D830025C05Rik	-2.11582	5.19515	4.68463e-05	0.00013663
Iglc2	-2.11619	4.17235	4.87597e-05	0.000141713
Chtop	-2.12012	4.54484	1.68338e-05	5.42727e-05
Brca2	-2.12242	5.02073	2.57815e-05	7.98995e-05
Ap1s2	-2.12373	3.79199	5.32974e-05	0.000153401
Dmxl1	-2.12556	3.80459	0.000217434	0.000540209
H2-Ob	-2.13154	3.57113	0.000996047	0.00209698
Mtfr1	-2.13183	6.29788	4.65455e-08	3.02946e-07
Klf2	-2.13476	3.58035	9.74647e-05	0.000262706
Gm42502	-2.13676	3.63527	0.000224411	0.00055522
Gigyf1	-2.14013	5.4028	3.9274e-06	1.49716e-05
Nr2c2	-2.14316	5.98881	4.97908e-08	3.22052e-07
Cp	-2.14698	6.71015	5.8824e-09	4.74126e-08
Usp33	-2.15425	3.07944	0.00205648	0.0040767
Parp8	-2.16037	3.52117	6.82703e-05	0.000191719
Cbx7	-2.16248	7.29519	4.11144e-09	3.46846e-08
Gm17530	-2.16347	2.96649	0.000161933	0.000413431
B430319F04Rik	-2.16415	4.52589	2.41718e-05	7.53038e-05
Snx2	-2.16613	5.34519	2.69509e-06	1.07365e-05
Sin3a	-2.17172	4.73329	3.44187e-05	0.00010373
Pan3	-2.17389	5.28773	1.05498e-06	4.64793e-06
Gm43980	-2.18151	7.17152	2.4806e-08	1.75158e-07
Gm16229	-2.19512	9.1262	2.31707e-14	1.69064e-12
Nans	-2.19773	3.93212	0.000320473	0.000762063
Cept1	-2.19916	6.78667	3.34812e-09	2.93454e-08
Prr33	-2.19931	8.11793	3.92484e-11	6.85858e-10
Macf1	-2.19952	5.25669	1.10169e-05	3.70109e-05
Arhgap27os1	-2.20315	5.85495	1.34176e-07	7.55128e-07
Zscan30	-2.21232	5.39435	3.72101e-07	1.84454e-06
Arid1b	-2.21398	4.25297	1.37032e-05	4.49897e-05
4930444A19Rik	-2.21908	8.37451	2.4095e-12	6.91111e-11
Tnip2	-2.2252	3.02486	0.000115432	0.000304235
Pdpr	-2.23131	4.81528	1.51324e-05	4.94388e-05
Atp2a3	-2.23243	3.77683	0.00036177	0.000850537
Gm12802	-2.23269	6.07525	2.75578e-08	1.9166e-07
Orm2	-2.23355	4.61074	4.86489e-06	1.80331e-05
Add3	-2.23553	4.44395	7.33116e-05	0.000203404
Gm36279	-2.23676	9.49959	8.36959e-14	4.70393e-12
Gm45001	-2.24212	3.55879	0.000345208	0.000814909
Gm43850	-2.24982	4.02	0.00016188	0.000413431
Krtcap3	-2.25204	4.75307	7.35085e-06	2.56837e-05
Ets1	-2.25308	5.61036	5.23818e-06	1.906e-05
Ubl5	-2.25379	8.62305	1.12838e-13	6.17489e-12
D730005E14Rik	-2.25441	7.65259	1.39516e-11	3.0701e-10
Prkcd	-2.25708	6.3182	7.05297e-09	5.5873e-08
Tsc2	-2.25756	7.36935	2.00533e-10	2.68173e-09
Akap13	-2.25959	4.87622	7.36114e-06	2.56837e-05
Vps37b	-2.26351	7.56957	2.0605e-11	4.16e-10
Retreg1	-2.26367	3.13752	0.000399509	0.000930093
Gm37829	-2.26752	5.59232	1.79272e-06	7.47087e-06
4930512B01Rik	-2.27926	6.22442	5.35861e-08	3.42342e-07
Clk1	-2.28335	3.02076	0.000112855	0.000298768
Hopxos	-2.2872	6.80346	5.31574e-08	3.40126e-07
Slc7a7	-2.28839	5.43568	2.06516e-06	8.46209e-06
Mrpl38	-2.29431	3.68498	0.000286456	0.00069025
Gm43461	-2.29585	4.38173	8.93498e-06	3.05849e-05
Armc6	-2.29667	4.94972	4.21476e-06	1.59211e-05
Gm16209	-2.29865	3.31006	6.15599e-05	0.000174763
H2-Pa	-2.30077	3.60387	0.000234912	0.000578792
Emc4	-2.30159	6.79309	7.43395e-09	5.80006e-08
Nr2f6	-2.32462	5.43507	3.89014e-06	1.48979e-05
Cmc1	-2.32467	4.55941	4.91273e-06	1.81212e-05
1700008B11Rik	-2.32565	5.30897	9.64748e-07	4.28216e-06
Gm38287	-2.33572	5.66761	6.45888e-07	2.99137e-06
Poc1b	-2.33901	5.73506	1.67221e-07	9.11494e-07
Gm26574	-2.33985	4.62466	8.14456e-06	2.81106e-05
Gm14252	-2.34789	5.53563	1.69749e-07	9.20812e-07
Zfhx2os	-2.349	4.45744	5.2233e-06	1.90401e-05
6030442K20Rik	-2.35438	3.78872	2.51775e-05	7.82609e-05
E130215H24Rik	-2.3549	6.8151	8.47779e-10	9.0408e-09
Gm16091	-2.35676	7.38934	2.60741e-10	3.30198e-09
Syk	-2.35702	4.48677	1.63659e-05	5.30106e-05
4930595D18Rik	-2.36171	3.79674	0.000650747	0.00143426
Kdm2a	-2.36527	2.6974	0.00084952	0.00181934
Ciz1	-2.36895	3.77095	0.00012273	0.000321636
Notch2	-2.37054	3.73765	4.27642e-05	0.000126498
Gm37847	-2.38944	3.83469	4.85399e-05	0.000141173
Apc2	-2.39182	3.73327	5.86705e-05	0.000167475
Utp20	-2.39191	2.99842	0.000677743	0.00148667
C230038L03Rik	-2.40153	3.12545	6.72932e-05	0.000189103
Gm13620	-2.40187	6.10242	7.67735e-09	5.96824e-08
Gm27209	-2.40893	4.55681	2.23762e-05	7.02889e-05
Gpr182	-2.41272	5.04995	3.35926e-06	1.31431e-05
Prrt3	-2.41632	4.18846	7.90167e-06	2.73631e-05
Ddx39a	-2.41655	11.1724	4.85237e-18	1.68175e-15
Lbh	-2.42993	3.06853	5.34764e-05	0.000153809
P2rx4	-2.44823	5.33089	2.70832e-07	1.40273e-06
Gm38384	-2.45623	5.86104	1.15765e-06	5.04155e-06
Tmem91	-2.46008	2.85916	4.14613e-05	0.000122819
Txndc11	-2.4618	7.67293	4.82282e-12	1.25363e-10
Gm38244	-2.46836	3.2975	3.53111e-05	0.000106112
Iffo2	-2.47221	3.41065	0.00120006	0.00247946
Sdccag8	-2.47918	6.80896	3.04193e-10	3.75412e-09
Susd6	-2.486	3.10896	3.94291e-05	0.000117553
Gm15872	-2.5032	4.9078	1.74138e-06	7.3008e-06
Lpar2	-2.5034	3.02059	9.48699e-05	0.000256877
Zbtb7b	-2.50438	3.31763	4.34068e-05	0.000127944
Gm50130	-2.50666	3.98758	6.5801e-05	0.00018516
Gm16174	-2.5067	4.13788	5.66561e-06	2.04138e-05
Gpx3	-2.51096	3.62573	0.000464785	0.00106269
Gm47009	-2.51261	4.62975	2.97608e-06	1.17434e-05
Pde3b	-2.51592	5.20367	2.21865e-06	9.01989e-06
Abcd1	-2.51705	6.35255	3.08861e-07	1.57036e-06
Gm11212	-2.52553	2.87965	4.40623e-05	0.000129692
Chil5	-2.52784	5.01979	3.01651e-06	1.18916e-05
Klhl24	-2.54565	3.18448	7.13388e-05	0.000198993
Stk17b	-2.55863	4.04597	0.000105263	0.00028162
Il17c	-2.5597	3.52832	2.5268e-05	7.84838e-05
Med12l	-2.56181	3.59094	1.98069e-05	6.28832e-05
Dgat1	-2.57239	2.70027	2.10744e-05	6.66021e-05
Mast4	-2.57275	6.83284	4.52389e-10	5.32999e-09
Sirt2	-2.57558	6.43901	1.46797e-09	1.42314e-08
Gm44148	-2.58843	4.44353	7.53924e-05	0.000208205
4930562F07Rik	-2.59598	9.76782	6.02889e-16	9.6439e-14
Lmo2	-2.60017	3.96934	5.00797e-06	1.83994e-05
1700084E18Rik	-2.60204	5.12408	1.4702e-07	8.15273e-07
Lratd2	-2.6042	2.91249	3.80011e-05	0.000113376
Tut4	-2.60892	4.27513	3.93209e-06	1.49758e-05
Trim12c	-2.60896	4.78734	6.77249e-07	3.1227e-06
Irak3	-2.60901	4.29605	7.13801e-06	2.50312e-05
Tubb6	-2.61169	4.69027	1.04164e-06	4.60379e-06
Ptprc	-2.61926	5.71024	8.43935e-07	3.80274e-06
Gm20033	-2.62438	4.43726	9.98512e-07	4.42259e-06
Slc49a4	-2.62459	3.47049	5.0844e-05	0.000146949
2310043M15Rik	-2.634	5.38649	1.01311e-07	5.94292e-07
Fbxl3	-2.63687	3.92596	3.05809e-05	9.32448e-05
Esyt1	-2.64622	3.59449	6.36609e-06	2.26683e-05
Gm47862	-2.64689	3.72005	3.75386e-05	0.000112238
Rps11	-2.6534	9.10964	4.50132e-14	2.88015e-12
Avpr2	-2.65767	9.92472	1.63745e-15	2.12818e-13
Serpinc1	-2.67086	7.82713	8.63198e-13	3.11912e-11
Stx5a	-2.6728	3.58925	4.58174e-05	0.000134099
Nomo1	-2.68007	5.46464	3.88082e-07	1.91685e-06
Zfp597	-2.68274	2.72181	0.000114767	0.000302866
Lgals1	-2.68283	3.95154	2.12974e-05	6.72047e-05
Bbs4	-2.68575	3.6963	7.33247e-06	2.56698e-05
Kdm7a	-2.69225	3.21191	5.07357e-05	0.000146738
Itgb7	-2.69271	2.61313	7.35636e-05	0.000203831
Marchf1	-2.69613	3.78131	2.0398e-05	6.46117e-05
4930599N23Rik	-2.70224	7.49059	1.12586e-11	2.55872e-10
Ifi27	-2.71138	5.31726	2.14584e-07	1.14417e-06
Gvin3	-2.71519	3.30892	0.000350903	0.000827796
Ankrd11	-2.73182	6.94497	5.08818e-11	8.56751e-10
Fcamr	-2.73196	7.41217	6.66553e-12	1.61507e-10
Sfi1	-2.76755	7.69769	8.70245e-13	3.11912e-11
Sh3kbp1	-2.78037	2.88162	6.99488e-05	0.000195772
Cerkl	-2.78668	7.30797	2.59037e-12	7.23045e-11
Sult1a1	-2.79405	3.09402	0.00013652	0.000354203
4930426D05Rik	-2.82095	6.92728	8.0985e-11	1.22926e-09
Scarf1	-2.84389	3.41245	0.000375291	0.000877861
Cd27	-2.84462	5.28929	6.95447e-08	4.26097e-07
Angptl1	-2.85038	4.82833	3.91759e-06	1.49617e-05
Lnpep	-2.85477	2.68889	8.34679e-05	0.000228234
Kcnh6	-2.85799	3.89879	0.000393396	0.000917116
St8sia4	-2.85899	2.80811	0.000127134	0.000331713
Olfr173	-2.86237	2.93576	6.02203e-05	0.000171311
H60b	-2.87246	4.16836	1.07555e-05	3.62202e-05
B3gnt5	-2.87297	3.20535	1.30357e-05	4.30623e-05
Gm48570	-2.88394	2.86529	5.90953e-05	0.000168571
Cytip	-2.88548	3.70317	4.04947e-06	1.53947e-05
Rnf216	-2.88556	5.05053	1.10931e-07	6.39894e-07
Myo5a	-2.88628	4.88054	1.82963e-06	7.60944e-06
BC035044	-2.89161	3.66326	2.28978e-06	9.27282e-06
Gm8250	-2.9141	3.44511	7.09812e-05	0.000198261
Ccar2	-2.92334	5.73225	1.46934e-07	8.15273e-07
Arhgap25	-2.9258	2.74228	4.33598e-05	0.000127896
Wwp1	-2.92648	3.13375	3.34894e-06	1.31151e-05
Naa25	-2.93222	4.18428	8.29839e-06	2.8594e-05
Trim8	-2.93867	5.26921	3.15982e-07	1.59487e-06
Epc1	-2.97949	4.24267	2.82609e-06	1.1194e-05
1700001K23Rik	-2.99131	4.1645	5.89879e-07	2.75962e-06
Mthfd1	-2.99525	3.47011	3.72818e-05	0.00011155
Vim	-3.01292	4.72243	1.73947e-07	9.38319e-07
Gm15650	-3.01978	5.15922	1.69505e-07	9.20812e-07
Cass4	-3.02989	4.17088	1.55013e-06	6.54518e-06
G0s2	-3.04732	2.49197	0.000214558	0.0005337
Gm29264	-3.04844	2.81439	2.61488e-05	8.08965e-05
Gm18030	-3.04983	3.87716	3.37726e-06	1.32011e-05
Icosl	-3.06271	2.88295	2.11215e-05	6.67003e-05
Gvin-ps7	-3.06853	3.52914	2.20049e-05	6.92797e-05
Tubb4a	-3.07729	3.64994	3.08137e-05	9.38171e-05
9930014A18Rik	-3.07967	7.33766	3.8703e-11	6.7918e-10
Filip1l	-3.08062	3.15584	4.28377e-05	0.000126625
Gm20519	-3.08137	3.6083	1.41182e-06	6.02231e-06
Gm27240	-3.09992	3.15977	2.03546e-06	8.35682e-06
Ifi203	-3.10619	3.06093	8.42446e-05	0.000230055
Gm42870	-3.10672	6.15922	3.77152e-09	3.25431e-08
Slc16a6	-3.10823	6.31005	6.18273e-10	6.93099e-09
Irf2bpl	-3.10993	4.96661	7.79072e-08	4.69588e-07
Gm13822	-3.11481	2.90673	6.14248e-05	0.000174498
Gm10584	-3.12039	6.21266	1.2439e-09	1.24034e-08
Hsd11b1	-3.12421	5.09597	2.20801e-07	1.17581e-06
Trim12a	-3.12671	2.65703	9.49237e-06	3.23332e-05
Hhex	-3.13621	3.05999	5.35732e-05	0.000153981
Prr29	-3.14011	2.95774	7.16747e-07	3.28299e-06
Tnfrsf10b	-3.14499	3.25379	8.75162e-06	3.00066e-05
Mst1	-3.14542	5.60003	3.99424e-09	3.40738e-08
1700093J21Rik	-3.14637	3.2274	2.56879e-05	7.96688e-05
Cfap45	-3.15777	3.86857	7.5393e-07	3.43063e-06
Snapc4	-3.16576	2.72181	1.15337e-05	3.85911e-05
Gm45548	-3.17452	3.64266	4.76229e-07	2.28711e-06
Gm43413	-3.20531	3.44593	2.0125e-05	6.37957e-05
Sgsm2	-3.21007	4.18922	4.55417e-07	2.20242e-06
Ampd3	-3.21517	4.63699	1.59329e-07	8.74207e-07
Haao	-3.23686	4.05062	3.12917e-07	1.58143e-06
Atxn2	-3.24868	3.66656	5.99205e-06	2.14311e-05
Wdr19	-3.25439	2.72235	4.98513e-06	1.83317e-05
Gm14834	-3.25463	3.51359	6.29525e-07	2.93167e-06
Gm37844	-3.25701	8.20831	6.32752e-13	2.50468e-11
Gm47248	-3.26412	8.68134	7.03188e-16	1.08317e-13
Dop1b	-3.27742	2.52474	2.05053e-06	8.41041e-06
Gm15342	-3.29721	6.69692	2.78936e-11	5.27315e-10
Lyn	-3.31228	3.94256	1.04323e-07	6.06823e-07
Gm6610	-3.35875	3.2076	3.65216e-06	1.4156e-05
Hes5	-3.35925	3.83529	4.5988e-07	2.22142e-06
Gm47177	-3.35928	3.31279	2.38704e-07	1.26146e-06
Kcnrg	-3.36783	2.9535	6.70057e-06	2.3697e-05
Gm53028	-3.36821	2.96351	2.15081e-06	8.76123e-06
Scx	-3.37241	3.33183	2.26857e-07	1.20344e-06
Usp18	-3.37638	3.86278	2.44243e-07	1.27774e-06
Gm29811	-3.37818	3.18613	5.1168e-06	1.87496e-05
Gm26716	-3.38305	3.29947	1.3887e-05	4.5549e-05
Sbk1	-3.41746	3.11078	1.49593e-07	8.27339e-07
Trim5	-3.42089	2.81722	2.43123e-06	9.779e-06
Morc3	-3.42973	2.78911	3.89794e-06	1.4914e-05
Slfn5os	-3.42994	6.34571	2.69668e-10	3.39863e-09
Gm10561	-3.43301	3.60304	6.79615e-06	2.40146e-05
Arhgef3	-3.44036	2.84301	5.25205e-06	1.90938e-05
Ap1g1	-3.47187	4.3005	5.8284e-08	3.68394e-07
Gm45472	-3.48326	4.76689	1.56821e-08	1.1626e-07
Ltk	-3.48662	2.86612	1.4898e-06	6.31111e-06
Gm15991	-3.49469	3.37534	6.43144e-06	2.28618e-05
5430431A17Rik	-3.49521	3.39949	2.84891e-06	1.12737e-05
Snord35b	-3.49821	5.35119	5.62846e-07	2.66281e-06
Acss1	-3.50394	3.55788	2.36352e-07	1.25222e-06
Lrba	-3.50593	3.38911	3.55746e-07	1.77414e-06
Ptpdc1	-3.54769	3.17639	3.7724e-06	1.45272e-05
Gm16214	-3.56595	8.50759	1.93038e-15	2.43287e-13
Dusp28	-3.56896	2.62841	1.33401e-05	4.39282e-05
B3gnt8	-3.57067	2.88439	5.67927e-07	2.67498e-06
Gm20421	-3.58162	5.03149	3.2418e-08	2.21551e-07
Gm26789	-3.58804	5.46424	1.08909e-08	8.26553e-08
Bank1	-3.59	3.00341	9.41108e-06	3.20825e-05
Nup160	-3.59094	2.13964	8.90494e-07	3.97805e-06
Stard10	-3.59848	4.99755	5.5074e-09	4.49123e-08
Gm43668	-3.60995	2.70344	4.97692e-07	2.38194e-06
Nfkbiz	-3.61145	2.55858	4.31922e-06	1.62273e-05
Pigr	-3.63792	2.41092	1.21929e-06	5.28231e-06
Sec22c	-3.65322	4.39366	7.2349e-07	3.31023e-06
Fundc1	-3.66487	3.24662	8.83538e-08	5.25699e-07
Tapbpl	-3.67284	5.23927	4.51648e-09	3.74931e-08
Cr2	-3.67352	3.70118	1.00571e-05	3.4117e-05
Zfp318	-3.67463	3.22262	5.3698e-08	3.4253e-07
Gm41555	-3.68506	7.32954	8.54145e-13	3.11912e-11
Mybbp1a	-3.69364	4.44304	2.371e-07	1.25458e-06
Gm48682	-3.69992	3.50003	2.34118e-06	9.45851e-06
Brwd1	-3.70358	4.25436	4.46667e-08	2.94346e-07
Oprm1	-3.70912	2.68888	5.44084e-07	2.58611e-06
Gm47861	-3.7112	2.20208	3.0931e-07	1.57072e-06
Ccdc125	-3.71846	3.49218	1.4046e-07	7.88355e-07
Siglecg	-3.72674	2.70425	3.55766e-07	1.77414e-06
Gm43963	-3.72768	7.09989	1.55048e-12	4.84846e-11
Pygm	-3.74012	2.44941	6.8705e-07	3.16438e-06
4930523C07Rik	-3.75242	2.74479	2.85107e-07	1.46934e-06
Pigv	-3.76232	5.2225	7.18779e-09	5.67249e-08
Nacad	-3.77411	6.89245	2.37152e-11	4.67447e-10
4930439D14Rik	-3.77959	5.47315	1.95549e-08	1.41442e-07
Kctd12	-3.79213	3.26674	4.28483e-07	2.08428e-06
Gm16083	-3.8086	8.50092	4.47953e-16	7.45215e-14
Gm9530	-3.81945	2.25285	1.83957e-07	9.89749e-07
Gm17552	-3.82384	9.00878	4.30684e-16	7.45215e-14
Cd302	-3.82698	3.01106	2.52769e-07	1.31573e-06
Palm3	-3.82886	4.32986	9.26903e-09	7.11253e-08
Gm15337	-3.83612	6.30675	2.56456e-11	4.98411e-10
Edaradd	-3.85971	3.0326	1.4166e-07	7.94022e-07
Gm15408	-3.86336	6.12171	4.47995e-08	2.94346e-07
Hipk2	-3.86791	3.85017	1.16391e-07	6.64021e-07
F830208F22Rik	-3.87209	2.25207	1.82454e-07	9.82937e-07
Kif9	-3.89353	2.28051	1.14287e-07	6.54709e-07
Rpl13-ps5	-3.89569	2.29043	1.72042e-07	9.29252e-07
Bach2os	-3.90351	8.05546	1.04107e-14	9.21239e-13
Mgat5	-3.93252	3.02367	1.79187e-05	5.7394e-05
Tmem120b	-3.946	4.50355	5.8459e-08	3.68939e-07
Gm35060	-3.96599	2.35986	4.83825e-07	2.32091e-06
Gm10645	-3.96715	3.43676	1.58612e-06	6.67679e-06
C430042M11Rik	-4.02784	3.96161	6.39104e-08	3.96721e-07
Pcnx2	-4.06909	2.9202	3.17471e-08	2.17523e-07
Slc35g2	-4.09126	3.17359	4.31887e-08	2.86022e-07
Usf3	-4.11067	2.4274	1.5968e-07	8.74981e-07
Rln3	-4.12929	2.93683	3.78378e-08	2.5464e-07
Ralgps2	-4.13655	3.68906	1.2696e-06	5.47639e-06
Chrnb1	-4.15616	4.12394	2.24978e-08	1.59673e-07
Gm15356	-4.15831	2.43627	3.92313e-08	2.63166e-07
Cd55	-4.17096	3.59108	1.49483e-07	8.27339e-07
Gm44401	-4.19282	2.46995	5.03571e-08	3.24706e-07
Usp36	-4.21648	3.6255	5.13352e-08	3.2948e-07
Olfr164	-4.22915	3.95414	2.40036e-07	1.26528e-06
Gm43990	-4.24206	2.46798	3.98378e-08	2.66375e-07
Kcng1	-4.26185	5.56239	6.16043e-10	6.92465e-09
Gm47243	-4.26653	2.69068	1.4457e-07	8.05988e-07
Gm13561	-4.28142	3.64692	9.99778e-08	5.88129e-07
Prkce	-4.28386	4.06124	1.32652e-08	9.92266e-08
Otud1	-4.29237	3.42593	4.89671e-06	1.81026e-05
Gm28720	-4.2924	2.90282	1.1202e-07	6.44388e-07
Gm43769	-4.31113	2.76563	7.41747e-08	4.51012e-07
Cpne5	-4.31213	2.73239	1.12352e-07	6.44515e-07
Gm22720	-4.3251	2.53401	4.18124e-08	2.78682e-07
Gm34006	-4.33231	2.48048	5.04573e-08	3.24848e-07
Gm13594	-4.33373	3.80049	1.8251e-09	1.70193e-08
Gm14965	-4.35093	4.91931	1.24562e-06	5.38515e-06
Dennd1c	-4.35302	2.77229	9.23237e-07	4.11107e-06
Gm26581	-4.3557	4.06402	1.56542e-09	1.5036e-08
Fcrl1	-4.36608	2.49762	8.37051e-08	5.00906e-07
Klhl14	-4.38906	5.54057	7.10565e-11	1.09991e-09
Rftn2	-4.40236	2.51332	3.93737e-08	2.63696e-07
Vmn2r97	-4.40417	5.40575	3.724e-08	2.51023e-07
Sorl1	-4.40655	4.0791	4.4503e-09	3.70176e-08
1700071M16Rik	-4.42235	2.03211	5.73784e-09	4.65179e-08
Vmn2r84	-4.42729	4.27314	1.2881e-09	1.27552e-08
Gm12490	-4.44585	2.018	6.14394e-09	4.93294e-08
Arhgef18	-4.4562	2.04912	1.74777e-08	1.28427e-07
Olfr98	-4.46095	3.62405	1.31638e-09	1.29476e-08
Pdcd11	-4.46486	7.21518	6.15971e-14	3.71279e-12
Polr2e	-4.4724	2.60356	1.3022e-08	9.75828e-08
Gm15336	-4.47452	5.19011	3.2045e-10	3.94305e-09
Gm28289	-4.48121	6.01344	1.91089e-10	2.59166e-09
Cc2d2b	-4.50648	4.7737	5.69418e-09	4.62541e-08
Pex11g	-4.51372	4.62408	1.00421e-08	7.63533e-08
Tmcc2	-4.51518	3.1192	5.82584e-09	4.70479e-08
Tsc22d3	-4.54379	2.04912	7.28665e-09	5.72877e-08
Gm33489	-4.56309	2.0895	4.37314e-09	3.65219e-08
Mapk12	-4.57858	4.12064	4.47986e-08	2.94346e-07
Ccne1	-4.60382	4.36283	4.0999e-09	3.46575e-08
Psd3	-4.65826	2.14097	2.42833e-09	2.20512e-08
Gm20612	-4.65969	3.43175	7.38579e-09	5.77396e-08
Il24	-4.67206	3.19291	3.1539e-09	2.79086e-08
Gm16170	-4.67508	8.69262	3.14701e-17	8.18025e-15
Gm9937	-4.70293	2.69589	2.3993e-09	2.18352e-08
Gm16274	-4.70746	2.67826	5.45556e-09	4.45769e-08
Gm26560	-4.7889	2.21565	3.03189e-09	2.69437e-08
Tbc1d2	-4.81159	2.20015	1.4393e-09	1.39861e-08
Chad	-4.88434	5.16396	3.99807e-09	3.40738e-08
Samd9l	-4.9305	3.02856	2.55362e-08	1.794e-07
Gm15154	-4.93138	2.83729	4.94984e-09	4.09272e-08
Fam149b	-4.9914	8.35917	2.74058e-15	3.10918e-13
Gm29417	-5.04241	3.63474	1.05888e-09	1.07939e-08
2310015A10Rik	-5.07529	3.11424	1.66801e-09	1.59111e-08
Lrrk2	-5.13333	2.89916	1.03106e-09	1.06407e-08
Aim2	-5.14679	3.43415	7.62566e-10	8.34609e-09
Nxpe4	-5.20012	6.26166	2.12205e-12	6.34937e-11
Igkv4-81	-5.2168	2.40191	4.1399e-10	4.93885e-09
Rapgef4os2	-5.2591	5.10377	1.14593e-09	1.15813e-08
Kbtbd11	-5.28476	3.23206	8.64588e-10	9.17961e-09
Rapgef4os3	-5.32746	4.02946	1.04002e-09	1.06934e-08
Gm3443	-5.34071	2.49951	2.08461e-10	2.76111e-09
Nxpe1-ps	-5.34363	4.85016	2.61205e-10	3.30198e-09
Cd55os	-5.34487	8.48224	4.70611e-15	4.89317e-13
Gm19261	-5.37005	4.7372	2.41019e-10	3.1034e-09
Gm20234	-5.39901	3.0379	1.98172e-10	2.6587e-09
Ms4a6c	-5.40364	7.71758	4.17161e-15	4.44865e-13
4632428C04Rik	-5.46914	4.37269	7.91432e-10	8.57179e-09
Sell	-5.83055	2.70466	3.01059e-11	5.56491e-10
Gm16015	-5.85883	4.46171	8.90214e-10	9.37316e-09
Cd38	-5.9036	4.84831	2.15356e-09	1.97283e-08
Gm15908	-5.95742	3.72698	1.91929e-10	2.59166e-09
Gm45694	-6.08155	3.92666	4.23843e-11	7.34485e-10
Sele	-6.40198	3.01965	1.78585e-12	5.50175e-11
Slc4a3	-6.47485	3.05449	3.20317e-12	8.53974e-11
Ighd	-6.54379	3.0678	1.45254e-11	3.13259e-10
Gm15354	-6.57687	4.80053	2.38192e-10	3.08611e-09
Gm43198	-6.64145	6.03398	5.04127e-12	1.27845e-10
6530413G14Rik	-6.85543	7.36873	7.35103e-13	2.75432e-11
Bckdha	-7.24572	3.43542	2.43962e-12	6.94957e-11

## Sheet: Supplementary File 1c
Supplementary File 1c. Differentially expressed genes between day 4 mock and day 4 VC B cells.
Gene	logFC (VC/Mock)	AveExpr	P.Value	adj.P.Val
Gm13192	4.6564	2.56993	5.35948e-07	0.000930941
Rnf165	3.64945	4.47952	3.13485e-06	0.00217809
Gm48840	1.33183	10.0004	4.40363e-07	0.000930941
1700120K04Rik	1.28241	5.51315	9.26328e-05	0.0229704
Gm5340	1.08813	6.02699	6.5404e-05	0.0217859
Lrp2bp	-1.08215	8.78519	1.71676e-05	0.00852003

## Sheet: Supplementary File 1d
Supplementary File 1d. Components of B27 serum free supplement.
The table modified from Gibco/ThermoFisher. Note that the concentrations were undiscoled.
Vitamins	Antioxidative?
Biotin (vitamin B7)
DL Alpha Tocopherol Acetate (vitamin E)	yes
DL Alpha-Tocopherol (vitamin E)	yes
Vitamin A (acetate)
Proteins	Antioxidative?
BSA, fatty acid free Fraction V
Catalase	yes
Human Transferrin
Superoxide Dismutase	yes
Hormones
Corticosterone
Human Recombinant Insulin
Progesterone
T3 (triodo-I-thyronine)
Other Components
D-Galactose
Ethanolamine HCl
Glutathione (reduced)	yes
L-Carnitine HCl
Linoleic Acid
Linolenic Acid
Putrescine 2HCl
Sodium Selenite
